1 **Dopamine Negatively Modulates the NCA Ion Channels in *C. elegans***

2

3

4 Irini Topalidou<sup>\*</sup>, Kirsten Cooper<sup>1</sup>, Laura Pereira<sup>†</sup>, and Michael Ailion<sup>\*</sup>

5

6

7 Department of Biochemistry, University of Washington, Seattle, WA, USA

8 <sup>†</sup>Department of Biological Sciences, Howard Hughes Medical Institute, Columbia University, New York, NY,

9 USA

10 <sup>1</sup>Current address: Fred Hutchinson Cancer Research Center, Seattle, WA, USA

11

12

13

14 <sup>\*</sup>Corresponding authors

15 Email: [it2117@uw.edu](mailto:it2117@uw.edu) (IT), [mailion@uw.edu](mailto:mailion@uw.edu) (MA)

16

17 Short title: NCA modulation by GRK-2 and dopamine

18

## 19 **Abstract**

20 The NALCN/NCA ion channel is a cation channel related to voltage-gated sodium and calcium channels.  
21 NALCN has been reported to be a sodium leak channel with a conserved role in establishing neuronal  
22 resting membrane potential, but its precise cellular role and regulation are unclear. The *Caenorhabditis*  
23 *elegans* orthologs of NALCN, NCA-1 and NCA-2, act in premotor interneurons to regulate motor circuit  
24 activity that sustains locomotion. Recently we found that NCA-1 and NCA-2 are activated by a signal  
25 transduction pathway acting downstream of the heterotrimeric G protein G<sub>q</sub> and the small GTPase Rho.  
26 Through a forward genetic screen, here we identify the GPCR kinase GRK-2 as a new player affecting  
27 signaling through the G<sub>q</sub>-Rho-NCA pathway. Using structure-function analysis, we find that the GPCR  
28 phosphorylation and membrane association domains of GRK-2 are required for its function. Genetic  
29 epistasis experiments suggest that GRK-2 acts on the D2-like dopamine receptor DOP-3 to inhibit G<sub>o</sub>  
30 signaling and positively modulate NCA-1 and NCA-2 activity. Through cell-specific rescuing experiments,  
31 we find that GRK-2 and DOP-3 act in premotor interneurons to modulate NCA channel function. Finally, we  
32 demonstrate that dopamine, through DOP-3, negatively regulates NCA activity. Thus, this study identifies a  
33 pathway by which dopamine modulates the activity of the NCA channels.

34

## 35 **Author summary**

36 Dopamine is a neurotransmitter that acts in the brain by binding seven transmembrane receptors that  
37 are coupled to heterotrimeric GTP-binding proteins (G proteins). Neuronal G proteins often function by  
38 modulating ion channels that control membrane excitability. Here we identify a molecular cascade  
39 downstream of dopamine in the nematode *C. elegans* that involves activation of the dopamine receptor  
40 DOP-3, activation of the G protein GOA-1, and inactivation of the NCA-1 and NCA-2 ion channels. We also  
41 identify a G protein-coupled receptor kinase (GRK-2) that inactivates the dopamine receptor DOP-3, thus  
42 leading to inactivation of GOA-1 and activation of the NCA channels. Thus, this study connects dopamine  
43 signaling to activity of the NCA channels through G protein signaling pathways.

44

## 45 Introduction

46 Heterotrimeric G proteins modulate neuronal activity in response to experience or environmental  
47 changes. G<sub>q</sub> is one of the four types of heterotrimeric G protein alpha subunits [1] and is a positive  
48 regulator of neuronal activity and synaptic transmission [2–4]. In the canonical G<sub>q</sub> pathway, G<sub>q</sub> activates  
49 phospholipase C $\beta$  (PLC $\beta$ ) to cleave the lipid phosphatidylinositol 4,5-bisphosphate (PIP2) into diacylglycerol  
50 (DAG) and inositol trisphosphate (IP3), which act as second messengers. In a second major G<sub>q</sub> signal  
51 transduction pathway, G<sub>q</sub> directly binds and activates Rho guanine nucleotide exchange factors (GEFs),  
52 activators of the small GTPase Rho [5–8]. Rho regulates many biological functions including actin  
53 cytoskeleton dynamics and neuronal development, but less is known about Rho function in mature  
54 neurons. In *C. elegans*, Rho has been reported to stimulate synaptic transmission through multiple  
55 pathways [9–11]. We recently identified the *C. elegans* orthologs of the NALCN ion channel, NCA-1 and  
56 NCA-2, as downstream targets of a G<sub>q</sub>-Rho signaling pathway [12]. We aim to understand the mechanism  
57 of activation of this pathway.

58 The NALCN/NCA ion channel is a nonselective cation channel that is a member of the voltage-gated  
59 sodium and calcium channel family [13–15]. The NALCN channel was proposed to be the major contributor  
60 to the sodium leak current that helps set the resting membrane potential of neurons [16], though there is  
61 controversy whether NALCN is indeed a sodium leak channel [17–19]. In humans, mutations in *NALCN* or  
62 its accessory subunit *UNC80* have been associated with a number of neurological symptoms, including  
63 cognitive and developmental delay [20–33]. In other organisms, mutations in NALCN/NCA or its accessory  
64 subunits lead to defects in rhythmic behaviors [16,34–42]. Specifically in *C. elegans*, the NCA channels act  
65 in premotor interneurons where they regulate persistent motor circuit activity that sustains locomotion  
66 [43]. In addition to the G<sub>q</sub>-Rho pathway described above, two other mechanisms have been reported to  
67 regulate the activity of the NALCN channel: a G protein-independent activation of NALCN by G protein-



68 coupled receptors [44,45] and a G protein-dependent regulation by extracellular  $\text{Ca}^{2+}$  [46]. Here we  
69 identify a molecular cascade downstream of dopamine in the nematode *C. elegans* that involves the D2-  
70 like dopamine receptor DOP-3 and the G protein-coupled receptor kinase GRK-2 to modulate activity of  
71 the NCA-1 and NCA-2 ion channels.

72 G protein-coupled receptor kinases (GRKs) are protein kinases that phosphorylate and desensitize G  
73 protein-coupled receptors (GPCRs). Mammalian GRKs have been divided into three groups based on their  
74 sequences and function: 1) GRK1 and GRK7, 2) GRK2 and GRK3, and 3) GRK4, GRK5 and GRK6 [47]. *C.*  
75 *elegans* has two GRKs: GRK-1 and GRK-2, orthologs of the GRK4/5/6 and GRK2/3 families respectively [48].  
76 Mammalian GRK2 is ubiquitously expressed [49,50] and GRK2 knock-out mice die as embryos [51]. In *C.*  
77 *elegans*, *grk-2* is expressed in the nervous system and required for normal chemosensation [52] and egg-  
78 laying [53]. In this study, we find that *C. elegans grk-2* mutants have locomotion defects due to decreased  
79  $G_q$  signaling. We identify the D2-like dopamine receptor DOP-3 as the putative GRK-2 target and find that  
80 GRK-2 acts through DOP-3 to inhibit  $G_o$  signaling. This in turn leads to activation of the NCA channels  
81 through the  $G_q$ -Rho signaling pathway. We also find that GRK-2 and DOP-3 exert their effect by acting in  
82 the premotor interneurons, where the NCA channels also act to regulate persistent motor neuron activity  
83 [43].

84 The D2-like receptors are GPCRs that couple to members of the inhibitory  $G_{i/o}$  family [54]. In  
85 mammals, GRK2 has been connected to the regulation of D2-type dopamine receptors, but the reported  
86 results are based mainly on effects of GRK2 overexpression in heterologous expression systems [55–59].  
87 The results reported here provide a direct connection between GRK-2 and D2-type receptor signaling in a  
88 behaviorally relevant *in vivo* system. In *C. elegans*, dopamine, through *dop-3*, causes the slowing of the  
89 worm's locomotion rate on food [60]; DOP-3 signals through  $G_o$  to inhibit locomotion [61]. Here we find  
90 that dopamine, through activation of DOP-3, negatively modulates the activity of the NCA channels. This

91 suggests a model in which dopamine signaling negatively regulates NCA channel activity and sustained  
92 locomotion through G protein signaling acting in premotor interneurons.

93

## 94 **Results**

95

### 96 **The G protein-coupled receptor kinase GRK-2 promotes G<sub>q</sub> signaling**

97 To identify regulators of G<sub>q</sub> signaling, we performed a forward genetic screen in the  
98 nematode *C. elegans* for suppressors of the activated G<sub>q</sub> mutant *egl-30(tg26)* [62,63]. The *egl-30(tg26)*  
99 mutant is hyperactive and has a tightly coiled “loopy” posture (Fig 1A and B). These phenotypes were  
100 suppressed by the *yak18* mutation isolated in our screen (Fig 1A). When outcrossed away from the *egl-*  
101 *30(tg26)* mutation, *yak-18* mutant animals are shorter than wild type animals, have slow locomotion (Fig  
102 1C, Right), and are egg-laying defective.

103 We mapped *yak18* to the left arm of Chromosome III and cloned it by whole-genome sequencing and a  
104 complementation test with the deletion allele *grk-2(gk268)* (see Methods). *yak18* is a G to A transition  
105 mutation in the W02B3.2 (*grk-2*) ORF that leads to the missense mutation G379E in the kinase domain of  
106 GRK-2. GRK-2 is a serine/threonine protein kinase orthologous to the human GPCR kinases GRK2 and GRK3  
107 [52]. The deletion allele *grk-2(gk268)* also suppresses the loopy posture and hyperactive locomotion of  
108 activated G<sub>q</sub> (Fig 1A and B) and causes defects in locomotion, egg-laying, and body-size similar to *grk-*  
109 *2(yak18)* (Fig 1C Left, S1A and S1B). We also found that *grk-2* mutant animals are defective in swimming  
110 (Fig S2), a locomotion behavior that has distinct kinematics to crawling [64]. Additionally, *grk-2* mutants  
111 restrict their movements to a limited region of a bacterial lawn, whereas wild-type animals explore the  
112 entire lawn (Fig S1C).

113 Our data suggest that GRK-2 regulates locomotion and is a positive regulator of G<sub>q</sub> signaling. The  
114 standard model of GRK action is that GPCR phosphorylation by GRK triggers GPCR binding to the inhibitory  
115 protein beta-arrestin; binding of arrestin blocks GPCR signaling and mediates receptor internalization [65].

116 We tested whether loss of arrestin causes defects similar to loss of *grk-2* by using a deletion allele in *arr-1*,  
117 the only *C. elegans* beta-arrestin homolog. We found that *arr-1(ok401)* mutant animals do not have slow  
118 locomotion (Fig S3A). To test whether an *arr-1* mutation suppresses activated  $G_q$ , we constructed an *egl-*  
119 *30(tg26)* mutant strain carrying an *arr-1* mutation in trans to a closely linked RFP marker (that is, an *egl-*  
120 *30(tg26); arr-1/RFP* strain). Surprisingly, this strain segregated few viable non-red animals, suggesting that  
121 *egl-30(tg26); arr-1* double mutants are subviable. The few *egl-30(tg26); arr-1* viable animals looked similar  
122 to the *egl-30(tg26)* single mutant (Fig S3B), but died as young adults. These results suggest that GRK-2 acts  
123 independently of arrestin to regulate locomotion rate and  $G_q$  signaling.

124 In addition to phosphorylation of GPCRs, mammalian GRK2 can also regulate signaling in a  
125 phosphorylation-independent manner [66,67]. Thus, we tested whether the kinase activity of GRK-2 is  
126 required for proper locomotion and  $G_q$  signaling by assaying whether a kinase-dead GRK-2[K220R] mutant  
127 [48,68] is capable of rescuing the *grk-2(gk268)* and *egl-30(tg26); grk-2(gk268)* mutants. Wild type GRK-2  
128 rescued the locomotion defect of *grk-2(gk268)* mutants (Fig 1C, Left), but the kinase dead GRK-2[K220R],  
129 although it was properly expressed (Fig 2G), did not rescue either the locomotion defect or the  
130 suppression of activated  $G_q$  (Fig 1C and D). We conclude that GRK-2 acts as a kinase to regulate locomotion  
131 rate and  $G_q$  signaling.

132

### 133 **GPCR-phosphorylation and membrane association domains of GRK-2 are required for its function in** 134 **locomotion**

135 To examine whether GRK-2 acts as a GPCR kinase to control locomotion, we took a structure-function  
136 approach (Fig 2A). We took advantage of previously-described mutations that disrupt specific activities of  
137 GRK-2, but do not disrupt GRK-2 protein expression or stability [48]. These mutations all affect conserved  
138 residues in well-characterized domains of GRK-2 [48].

139 Although GRKs act as kinases for activated GPCRs, mammalian GRKs have been shown to interact with  
140 and phosphorylate other molecules as well [66,67]. Therefore, although the kinase activity of GRK-2 is  
141 required for locomotion, it is possible that the relevant targets are proteins other than GPCRs. To examine  
142 whether phosphorylation of GPCRs is required for GRK-2 function in locomotion, we expressed GRK-2 with  
143 mutations (D3K, L4K, V7A/L8A, and D10A) that have been shown to reduce mammalian GRK2  
144 phosphorylation of GPCRs, but that do not affect phosphorylation of other targets [69]. These N-terminal  
145 residues of mammalian GRKs form an amphipathic  $\alpha$ -helix that contributes specifically to GPCR  
146 phosphorylation [70–74]. *grk-2(gk268)* mutants expressing any of these mutant GRK-2 constructs had slow  
147 locomotion like *grk-2(gk268)* (Fig 2B, 2C and 2G), indicating that GPCR phosphorylation is required for  
148 GRK-2 function in locomotion *in vivo*.

149 In mammalian GRKs, interaction of the N-terminal region with the kinase domain stabilizes a closed  
150 and more active conformation of the enzyme, important for phosphorylation of GPCRs and other  
151 substrates [70–72]. Specifically, mutation of mammalian GRK1 Arg191 disrupted phosphorylation of target  
152 substrates in addition to GPCRs, suggesting that this residue is critical for conformational changes  
153 important for GRK function as a kinase [71]. To determine whether the analogous residue in GRK-2 is  
154 required for its function in locomotion, we expressed GRK-2[R195A] in *grk-2(gk268)* mutants. GRK-  
155 2[R195A] did not rescue the *grk-2(gk268)* locomotion phenotype (Fig 2D and 2G), further supporting the  
156 model that GRK-2 acts as a GPCR kinase to regulate locomotion.

157 The RH (Regulator of G protein Signaling Homology) domain of mammalian GRK2 (Fig 2A) does not act  
158 like other RGS domains as an accelerator of the intrinsic GTPase activity of the  $G_q$  subunit, but instead  
159 interacts with  $G_q$  and participates in the uncoupling of GPCRs linked to  $G_q$  via a phosphorylation-  
160 independent mechanism [67,74]. To examine whether the  $G_q$ -binding residues of the RH domain are  
161 needed for GRK-2 function in locomotion, we expressed GRK-2[R106A], Y109I, and D110A that correspond  
162 to mutations previously shown to disrupt mammalian GRK2 binding to  $G_{q/11}$  [75]. All three mutant GRK-2

163 constructs rescued the slow locomotion defect of *grk-2(gk268)* (Fig 2E and 2G). These results suggest that  
164 GRK-2 binding to G<sub>q</sub> and phosphorylation-independent desensitization of GPCR signaling are not required  
165 for GRK-2 function in locomotion.

166 The pleckstrin homology (PH) domain of mammalian GRK2 (Fig 2A) mediates interactions of GRK2 with  
167 membrane phospholipids and Gβγ subunits [67,76–78]. To examine whether these activities are required  
168 for GRK-2 function in locomotion, we expressed GRK-2[K567E] that disrupts phospholipid binding [79] and  
169 GRK-2[R587Q] that disrupts binding to Gβγ [79]. Neither of these GRK-2 mutants rescued the locomotion  
170 defect of the *grk-2(gk268)* mutant (Fig 2F and 2G), suggesting that both phospholipid and Gβγ binding  
171 through the PH domain of GRK-2 are required for GRK-2 function in locomotion.

172

### 173 **GRK-2 acts in head acetylcholine neurons to control locomotion and G<sub>q</sub> signaling**

174 GRK-2 is broadly expressed in body and head neurons [52]. To determine where GRK-2 acts to control  
175 locomotion, we expressed the *grk-2* cDNA under the control of neuron-specific promoters. Expression  
176 of *grk-2* under the pan-neuronal (*Prab-3*) or acetylcholine neuron (*Punc-17*) promoters fully rescued *grk-*  
177 *2(gk268)* mutant locomotion (Fig 3A). Interestingly, expression in ventral cord acetylcholine motor neurons  
178 (*Pacr-2*) did not rescue the locomotion phenotype, but expression driven by an *unc-17* promoter derivative  
179 that is expressed mainly in the head acetylcholine neurons (*Punc-17H* [80,81]) rescued the locomotion  
180 phenotype (Fig 3A). Additionally, expression driven in a number of interneurons and head motoneurons  
181 by the *glr-1* promoter did not rescue (Fig 3A). To exclude the possibility that the described role of GRK-2 in  
182 chemosensation [52] contributes to the slow locomotion phenotype of *grk-2* mutants, we expressed *grk-2*  
183 under ciliated sensory neuron promoters (*Pxbx-1* and *Posm-6*). Expression of *grk-2* in ciliated sensory  
184 neurons did not rescue the slow locomotion of *grk-2* mutants (Fig 3A). We conclude that *grk-2* acts in head  
185 acetylcholine neurons to regulate locomotion.

186 To determine if *grk-2* also acts in head acetylcholine neurons to regulate G<sub>q</sub> signaling, we expressed  
187 the *grk-2* cDNA in the head acetylcholine neurons of *egl-30(tg26); grk-2* double mutants. Expression in  
188 head acetylcholine neurons reversed the *grk-2* suppression of the loopy posture and hyperactive  
189 locomotion of activated G<sub>q</sub> – that is, the *egl-30(tg26); grk-2* double mutants expressing *grk-2* cDNA in the  
190 head acetylcholine neurons resemble the activated G<sub>q</sub> single mutant (Fig 3B and C). These results suggest  
191 that *grk-2* acts in head acetylcholine neurons to positively regulate G<sub>q</sub> signaling.

192 To confirm that *grk-2* is expressed in the head acetylcholine neurons, we coexpressed tagRFP fused to  
193 GRK-2 driven by the *grk-2* promoter (*grk-2::tagRFP*) and GFP driven by the head acetylcholine neuron  
194 promoter (*Punc-17H::GFP*). We observed that *grk-2::tagRFP* is expressed broadly in head neurons and  
195 colocalizes with GFP in several head acetylcholine neurons (Fig 3D). We conclude that GRK-2 is expressed  
196 in head acetylcholine neurons to regulate locomotion and G<sub>q</sub> signaling.

197

### 198 **GRK-2 acts upstream of G<sub>o</sub> to regulate locomotion**

199 Our results suggest that GRK-2 acts as a GPCR kinase to regulate locomotion. If GRK-2 were a kinase for  
200 a GPCR coupled to G<sub>q</sub> (EGL-30 in *C. elegans*) then we would expect GRK-2 to negatively regulate G<sub>q</sub>, which  
201 does not agree with our data. Alternatively, GRK-2 could be a kinase for a GPCR coupled to G<sub>o</sub> (GOA-1 in *C.*  
202 *elegans*). The *C. elegans* G<sub>q</sub> and G<sub>o</sub> pathways act in opposite ways to regulate locomotion by controlling  
203 acetylcholine release [82]. EGL-30 is a positive regulator of acetylcholine release whereas GOA-1 negatively  
204 regulates the EGL-30 pathway through activation of the RGS protein EAT-16 and the diacylglycerol kinase  
205 DGK-1. *egl-30* loss-of-function mutants are immobile whereas *egl-30* gain-of-function mutants are  
206 hyperactive and have a loopy posture [83,84]. *goa-1* and *eat-16* mutants have locomotion phenotypes  
207 opposite those of *egl-30*; they are hyperactive and have a loopy posture [85–87]. *dgk-1* loss-of-function  
208 mutants are hyperactive but do not have a loopy posture [88]. To test whether GRK-2 acts on a G<sub>o</sub>-coupled  
209 GPCR, we examined whether *goa-1* mutations suppress *grk-2* mutants. We found that the *goa-1; grk-2*

210 double mutant is hyperactive and has a loopy posture like the *goa-1* single mutant (Fig S4A, S4C and S4D),  
211 indicating that GRK-2 acts upstream of *goa-1*. This result suggests that GRK-2 could be acting on GPCR(s)  
212 coupled to GOA-1.

213 To further dissect the GRK-2 pathway, we examined whether *grk-2* mutations suppress the hyperactive  
214 phenotypes of *eat-16* and *dgk-1* mutants. The *eat-16; grk-2* double mutant is hyperactive and has a loopy  
215 posture like the *eat-16* single mutant (Fig S4A, S4C and S4D) indicating that *eat-16*, like *goa-1*, acts  
216 downstream of GRK-2. By contrast, the *grk-2; dgk-1* double mutant is similar to *grk-2* (Fig S4B). Expression  
217 of the kinase dead GRK-2[K220R] in *grk-2; dgk-1* mutants does not restore *dgk-1* hyperactive locomotion  
218 (Fig S4E). In addition, expression of GRK-2 under a head acetylcholine neuron promoter in *grk-2; dgk-1*  
219 mutants restores *dgk-1* hyperactive locomotion (Fig S4F). Thus, GRK-2 regulation of the locomotion rate,  
220 G<sub>q</sub> signaling, and DAG signaling all depend on the GRK-2 kinase activity and a function of GRK-2 in head  
221 acetylcholine neurons.

222

### 223 **GRK-2 regulates the DOP-3 dopamine receptor**

224 In a search for potential G<sub>o</sub>-coupled GPCR targets for GRK-2, we considered the G<sub>o</sub>-coupled D2-like  
225 dopamine receptor DOP-3. In *C. elegans*, dopamine is required for the “basal slowing response”, a  
226 behavior in which wild type animals slow down when on a bacterial lawn [89]. This behavior is mediated by  
227 the mechanosensory activation of dopamine neurons caused by physical contact of the worm body with  
228 bacteria. *cat-2* mutants that are deficient in dopamine biosynthesis [90] or *dop-3* mutants that lack the D2-  
229 like dopamine receptor DOP-3, are defective in basal slowing [61,89]. DOP-3 has been proposed to act  
230 through G<sub>o</sub> in ventral cord acetylcholine motor neurons to decrease acetylcholine release and promote the  
231 basal slowing response [61].

232 If *grk-2* acts in the dopamine pathway to mediate proper locomotion, possibly by phosphorylating and  
233 inactivating DOP-3, then mutations in *dop-3* and *cat-2* should suppress the *grk-2* locomotion phenotype.

234 Indeed, the *grk-2* mutant slow locomotion phenotype was suppressed by mutations in *dop-3* and *cat-2* (Fig  
235 4A). A *dop-3* mutation also suppressed the swimming defect of the *grk-2* mutant (Fig S2). In addition, the  
236 *dop-3* and *cat-2* mutations reversed the *grk-2* suppression of the loopy posture and hyperactive  
237 locomotion of activated G<sub>q</sub> – that is, the triple mutants resemble the activated G<sub>q</sub> single mutant (Fig 4B-E  
238 and Fig S5). These results suggest that GRK-2 acts in the dopamine pathway to regulate locomotion and G<sub>q</sub>  
239 signaling by negatively regulating the D2-like dopamine receptor DOP-3.

240 Our results suggest that GRK-2 acts in head acetylcholine neurons to regulate locomotion. To test if  
241 DOP-3 acts in the same neurons as GRK-2, we expressed the *dop-3* cDNA under a pan-neuronal promoter  
242 (*Prab-3*), an acetylcholine neuron promoter (*Punc-17*), a head acetylcholine neuron promoter (*Punc-17H*),  
243 and an acetylcholine motor neuron promoter (*Pacr-2*) in the *grk-2; dop-3* double mutant. Expression  
244 driven by the pan-neuronal, acetylcholine neuron, and head acetylcholine neuron promoters reversed the  
245 *dop-3* suppression of the slow locomotion of *grk-2(gk268)* mutant animals – that is, *grk-2; dop-3* mutants  
246 expressing *dop-3* cDNA by these three promoters resemble the *grk-2* mutant (Fig S6A). By contrast,  
247 expression of the *dop-3* cDNA by an acetylcholine ventral cord motor neuron promoter did not reverse the  
248 *grk-2; dop-3* locomotion phenotype (Fig S6A) or the hyperactive locomotion and loopy posture of *egl-*  
249 *30(tg26); grk-2; dop-3* mutant animals (Fig S6C-E). We conclude that *dop-3*, like *grk-2*, acts in head  
250 acetylcholine neurons, consistent with the model that GRK-2 acts directly on DOP-3. Moreover, *dop-3*  
251 expression under the *grk-2* promoter reversed the *dop-3* suppression of the slow locomotion of *grk-2*  
252 mutants (Figure S7A), supporting the idea that GRK-2 and DOP-3 act in the same neurons.

253 We observed that *grk-2; dop-3* and *cat-2; grk-2* double mutant animals still retain some of the  
254 characteristic *grk-2* phenotypes: the animals have shorter bodies and are egg-laying defective. In addition,  
255 *grk-2* mutants do not fully explore a bacterial lawn and this behavior remains in the *grk-2; dop-3* double  
256 mutant (Fig S1C). Thus, GRK-2 has additional neuronal functions that do not depend on *dop-3*.



257 The D1-like dopamine receptor DOP-1 has been shown to act antagonistically to DOP-3 to regulate the  
258 basal slowing response: *dop-1* mutations suppress the *dop-3* basal slowing phenotype [61]. By contrast, we  
259 found that DOP-1 is not involved in the GRK-2 and DOP-3 pathway that regulates locomotion rate because  
260 *dop-1* mutations do not affect the locomotion rate of the *grk-2; dop-3* double mutant (Fig S6B). Thus, the  
261 role of DOP-3 in GRK-2-regulated locomotion is independent of its role in the basal slowing response.

262 Exposure of *C. elegans* to exogenous dopamine causes DOP-3-dependent paralysis — *dop-3* mutants  
263 are significantly resistant to the paralytic effects of exogenous dopamine [61]. If GRK-2 negatively  
264 regulates DOP-3, then *grk-2* mutants might be hypersensitive to dopamine due to increased DOP-3  
265 activity. Indeed, we found that *grk-2* mutants are hypersensitive to dopamine and this hypersensitivity  
266 depends on *dop-3* (Fig 4F).

267 In an effort to dissect the molecular mechanism by which *grk-2* regulates DOP-3 activity, we  
268 expressed GFP-tagged DOP-3 under the *grk-2* promoter in *dop-3* and *grk-2; dop-3* mutant animals and  
269 examined the levels of expression of DOP-3::GFP both by Western and by fluorescence microscopy (Fig  
270 S7). Although *Pgrk-2::DOP-3::GFP* fully reversed the *dop-3* suppression of the slow locomotion of *grk-2*  
271 mutants (Fig S7A), we did not observe any difference in the level of DOP-3 expression in a *grk-2* mutant  
272 (Fig S7B-D) nor did we observe any obvious change in the subcellular localization of DOP-3::GFP in a *grk-2*  
273 mutant (Fig S7C). However, one caveat is that we do not have the resolution to distinguish between DOP-3  
274 localization on the plasma membrane or in an intracellular compartment.

## 275

### 276 **GRK-2 is a positive modulator of NCA-1 and NCA-2 channel activity**

277 In addition to genes within the canonical  $G_q$ -PLC $\beta$  pathway, our screen for suppressors of activated  $G_q$   
278 also identified the Trio RhoGEF (UNC-73 in *C. elegans*) as a new direct  $G_q$  effector [8]. Recently, we  
279 identified the cation channels NCA-1 and NCA-2 as downstream targets of this  $G_q$ -Rho pathway.  
280 Specifically, we found that mutations in genes that encode accessory subunits of the NCA channels (*unc-*

281 79, *unc-80*) or in the NCA channels per se (*nca-1*; *nca-2*) suppress the neuronal phenotypes of activated G<sub>q</sub>  
282 and activated Rho [12]. Moreover, mutations in the Rho-NCA pathway suppress the loopy posture of the  
283 activated G<sub>q</sub> mutant more strongly than do mutations in the canonical PLCβ pathway [12]. Like mutations  
284 in the Rho-NCA pathway, *grk-2* mutants also strongly suppress the loopy posture of an activated G<sub>q</sub> mutant  
285 (Fig 1A, 4D and 4E), suggesting that *grk-2* may affect signaling through the Rho-NCA pathway.

286 To further examine whether *grk-2* affects Rho-NCA signaling, we built double mutants of *grk-2* with an  
287 activated Rho mutant (G14V), referred to here as Rho\*, expressed in acetylcholine neurons. Rho\* has a  
288 loopy posture and slow locomotion and a *grk-2* mutation partially suppresses these phenotypes (Fig 5A  
289 and 5B), consistent with *grk-2* affecting signaling through the Rho-NCA pathway.

290 We also built double mutants of *grk-2* and a dominant activating mutation in the NCA-1 channel gene,  
291 *nca-1(ox352)*, referred to here as Nca\* [12,24]. Like Rho\*, Nca\* mutants have a loopy posture and slow  
292 locomotion. However, *grk-2* mutants do not suppress either of these phenotypes because Nca\*; *grk-2*  
293 double mutants behave identically to Nca\* mutants (Fig 5C and 5D). This suggests that *grk-2* acts upstream  
294 of NCA.

295 *C. elegans* has two proteins that encode pore-forming subunits of NCA channels, NCA-1 and NCA-2.  
296 Mutations that disrupt both NCA-1 and NCA-2 channel activity cause a characteristic “fainter” phenotype  
297 in which worms suddenly arrest their locomotion and acquire a straightened posture [35]. Our genetic  
298 experiments indicate that GRK-2 affects Rho-NCA signaling, but *grk-2* mutants are not fainters. Given that  
299 *grk-2* partially suppresses Rho\*, we hypothesized that GRK-2 is not absolutely required for Rho-NCA  
300 signaling, but provides modulatory input. To test this hypothesis, we built double mutants between *grk-2*  
301 and *nlf-1*, which is partially required for localization of the NCA-1 and NCA-2 channels and has a weak  
302 fainter mutant phenotype [12,91]. A *grk-2* mutation strongly enhanced the weak fainter phenotype of an  
303 *nlf-1* mutant so that the double mutants resembled the stronger fainter mutants that completely abolish  
304 NCA-1 and NCA-2 channel activity (Fig 6A and 6B). Moreover, double mutants between *grk-2* and the

305 RhoGEF Trio *unc-73* were also strong fainters, supporting the hypothesis that GRK-2 modulates the Rho-  
306 NCA pathway (Fig 6C). By contrast, double mutants between *grk-2* and the *egl-8* PLC $\beta$  do not have a  
307 fainter phenotype (Fig 6C). These results suggest that GRK-2 is a positive modulator of NCA-1 and NCA-2  
308 channel activity.

309 If GRK-2 modulates the NCA channels by acting as a negative regulator of G<sub>o</sub> then we would expect  
310 that mutations in other proteins that act as negative regulators of G<sub>o</sub> might enhance the fainter phenotype  
311 of *nlf-1* mutants. Indeed, a mutation in *egl-10*, encoding the RGS that negatively regulates G<sub>o</sub> [92], strongly  
312 enhances the *nlf-1* fainter phenotype (Fig 6D). As controls, mutations in genes involved in dense-core  
313 vesicle biogenesis (*eipr-1* and *cccp-1*), that cause locomotion defects comparable to *grk-2* or *egl-10* [63,80],  
314 did not enhance the *nlf-1* fainter phenotype, indicating that the interactions of *grk-2* and *egl-10* with *nlf-1*  
315 are specific.

316 *grk-2* acts in head acetylcholine neurons to mediate locomotion. We recently used the same *Punc-17H*  
317 promoter construct to show that *nlf-1* also acts in head acetylcholine neurons and not in ventral cord  
318 motor neurons to regulate locomotion [12]. Therefore, we predicted that expression of an activated G<sub>o</sub>  
319 mutant under a head acetylcholine neuron promoter would enhance the fainter phenotype of *nlf-1*  
320 mutants. Indeed, we found that expression of the activated G<sub>o</sub> mutant GOA-1[Q205L] in head  
321 acetylcholine neurons makes the animals slow (Fig 6E) and significantly enhances the fainter phenotype of  
322 *nlf-1* mutants (Fig 6F). These results support the model that GRK-2 negatively regulates G<sub>o</sub>, and that G<sub>o</sub>  
323 negatively regulates NCA-1 and NCA-2 channel activity.

324

### 325 **Dopamine acts through DOP-3 to negatively modulate NCA-1 and NCA-2 channel activity**

326 Our results are consistent with the model that GRK-2 acts in locomotion by negatively regulating DOP-3  
327 and that GRK-2 is a positive modulator of NCA-1 and NCA-2 activity. These data predict that DOP-3 would  
328 be a negative modulator of NCA-1 and NCA-2 channel activity. Consistent with this model, mutations in

329 *cat-2* and *dop-3* almost fully suppress the *nlf-1* fainter phenotype during forward movement (Fig 7A and  
330 7B). Additionally, *dop-3* mutants partially suppress the strong *grk-2; nlf-1* fainter phenotype, consistent  
331 with the model that DOP-3 is a substrate for GRK-2 (Fig 7C). These results suggest that dopamine, through  
332 DOP-3, negatively modulates NCA-1 and NCA-2 channel activity.

333 To more directly test whether *grk-2* and *dop-3* modulate the NCA channel per se, we created double  
334 mutants between *grk-2* and the pore-forming subunit gene *nca-1*. *nca-1* mutants have a low penetrance,  
335 very weak backward-fainting phenotype that is strongly enhanced in a *grk-2* mutant background (Fig S3C  
336 and S6F). *arr-1* mutants, on the other hand, do not enhance the *nca-1* phenotype, further supporting the  
337 conclusion that arrestin does not play a role in this pathway (Fig S3C). As expected, *dop-3* suppresses the  
338 enhanced fainting phenotype of the *grk-2; nca-1* double mutant (Fig S6F).

339 Our data suggest that GRK-2 and DOP-3 play modulatory and not essential roles in the regulation of  
340 NCA-1 (and possibly NCA-2) channel activity. By contrast, UNC-80 is necessary for the stability and function  
341 of NCA-1 and NCA-2, so *unc-80* mutants are strong fainters [36,39]. As expected for a modulatory role in  
342 regulating NCA-1 and NCA-2 activity, mutations in *dop-3* and *cat-2* do not suppress the strong fainter  
343 phenotype of *unc-80* mutants (Fig S8A and S8B).

344 We showed above that *grk-2* mutants are hypersensitive to the paralytic effects of dopamine. We also  
345 found that low concentrations of dopamine do not paralyze *grk-2* mutants but instead cause them to faint,  
346 and that this effect depends on *dop-3* (Fig 7D). This is consistent with the model that dopamine acts  
347 through DOP-3 to negatively modulate NCA-1 and NCA-2.

348

### 349 **GRK-2 and DOP-3 act in command interneurons to control *grk-2* dependent locomotion**

350 In *C. elegans*, the NCA channels act in premotor interneurons [12,43,91]. To determine whether *grk-2*  
351 acts in a cell autonomous way to regulate NCA, we identified the head acetylcholine neurons where GRK-2  
352 is expressed. We coexpressed GRK-2 fused to tagRFP driven by the *grk-2* promoter (*grk-2::RFP*) and

353 nuclear YFP driven by the choline transporter *cho-1* promoter (*Pcho-1<sup>fosmid</sup>::SL2::YFP::H2B*), which is  
354 expressed in all acetylcholine neurons [93]. We found that *grk-2* is expressed in the following head  
355 acetylcholine neurons: the AVA, AVB, AVD, and AVE premotor interneurons; SMD and RMD head motor  
356 neurons; and in the AIN, AIY, SIA, SIB, and SAA interneurons (Fig 8A).

357 To further determine where GRK-2 acts to control locomotion, we expressed the *grk-2* cDNA under  
358 additional neuron-specific promoters in *grk-2* mutants. We used a *cho-1* promoter fragment for expression  
359 in the SMD and RMD head motor neurons [94], the *ceh-24* promoter for expression in the SIA and SIB  
360 interneurons, and a *ttx-3* promoter fragment for AIY-specific expression [95]. For expression in premotor  
361 command interneurons we used a combination of the *nmr-1* promoter for AVA, AVD and AVE (also PVC  
362 and RIM) expression together with the *sra-11* promoter for AVB (also AIY and AIA) expression, as  
363 previously described [91]. We found that *grk-2* expression in command interneurons fully rescued the slow  
364 locomotion of *grk-2* mutants, but expression in the other neuron types failed to rescue (Fig 8B-8E).  
365 However, expression of *grk-2* in only *sra-11* or only *nmr-1* expressing neurons did not rescue the slow  
366 locomotion defect (Fig S9). Additionally, *grk-2* expression in the command interneurons was sufficient to  
367 rescue the enhanced fainting phenotype of *grk-2; nlf-1* mutants (Fig 8F). Similarly, *dop-3* expression in the  
368 command interneurons was sufficient to reverse the *dop-3* suppression of the slow locomotion of *grk-2*  
369 mutants (Fig 8G). Given that the fainting phenotypes of *nlf-1* mutants and *nca* mutants were also rescued  
370 by expression in command interneurons [43,91], our results suggest that GRK-2, DOP-3, and the NCA  
371 channels act in the same neurons. However, we did not see rescue of the *grk-2* locomotion phenotype  
372 using the *glr-1* promoter (Fig 3A), which in principle is also expressed in the command interneurons, and  
373 similarly we did not observe statistically significant rescue of the *nlf-1* fainting phenotype using the same  
374 *glr-1* promoter [12]. The different results seen between the *glr-1* and the *nmr-1 + sra-11* promoters may  
375 be due to different levels of expression or because of expression in some different neuron types.

376

## 377 Discussion

378 In this study we identified a pathway that modulates the activity of the NCA-1 and NCA-2 channels  
379 through dopamine and G<sub>q</sub> signaling (Fig 9). We found that dopamine acts through the D2-like receptor  
380 DOP-3 to negatively modulate NCA-1 and NCA-2. Furthermore, we identified the GPCR kinase GRK-2 as a  
381 positive (indirect) regulator of G<sub>q</sub> and negative regulator of NCA-1 and NCA-2. Our results suggest that  
382 GRK-2 mediates its regulatory effects by inhibiting DOP-3.

383 In *C. elegans*, GRK-2 was previously found to act in sensory neurons to regulate chemosensation [52].  
384 Here we found that GRK-2 acts in command interneurons to regulate locomotion and G<sub>q</sub> signaling. Using a  
385 structure-function approach, we found that GPCR phosphorylation, Gβγ-binding, and membrane-binding  
386 are required for GRK-2 function in locomotion, but binding to G<sub>q</sub> is not required. Similar results were  
387 reported for the function of GRK-2 in chemosensation [48], suggesting that in both cases GRK-2 acts as a  
388 GPCR kinase and that membrane localization is critical for its function. Additionally, GRK-2 seems to act  
389 independently of arrestin to regulate both locomotion and chemosensation [52]. Because *cat-2* and *dop-3*  
390 mutants are hypersensitive to the aversive odorant octanol [96–98] and *grk-2* mutants are insensitive to  
391 octanol [52], GRK-2 might act as a GPCR kinase for DOP-3 in chemosensory neurons as well.

392 GRK-induced phosphorylation of GPCRs induces endocytosis, which leads to their sorting to either  
393 lysosomes for degradation or to recycling endosomes. GRK-dependent recruitment of arrestins to the  
394 phosphorylated receptor is typically required for endocytosis, but GRK2 was also reported to utilize  
395 arrestin-independent mechanisms to mediate receptor internalization [66]. GRK2 associates with a large  
396 number of proteins with known roles in receptor internalization and signaling. For example, the C-  
397 terminus of GRK2 directly binds clathrin and this interaction has been proposed to be involved in arrestin-  
398 independent internalization [99]. Our data suggest an arrestin-independent role for *C. elegans* GRK-2 in  
399 GPCR regulation, supporting the idea that the role of GRK-2 extends beyond just the recruitment of  
400 arrestin.

401 The D2-type dopamine receptors, like DOP-3, are GPCRs that couple to members of the inhibitory  $G_{i/o}$   
402 family. Mammalian GRK2 and GRK3 (the orthologs of GRK-2) have been connected to the desensitization,  
403 internalization, and recycling of D2-type dopamine receptors [55–59,100]. Interestingly, some of the  
404 effects of GRK2 on D2 receptor function may be independent of receptor phosphorylation [57,58,100],  
405 though one caveat of these studies is that they involve GRK2 overexpression in heterologous cells. Our  
406 structure-function approach indicates that GPCR phosphorylation is important for GRK-2 function in  
407 locomotion and  $G_q$  signaling in *C. elegans*, although we cannot exclude the possibility that phosphorylation  
408 of additional substrates may also be required. *In vivo* studies of the role of mammalian GRKs in the  
409 regulation of dopamine receptors have focused on the analysis of behaviors that are induced by  
410 psychostimulatory drugs such as cocaine that elevate the extracellular concentration of dopamine [59].  
411 Mice with a cell-specific knockout of GRK2 in D2 receptor-expressing neurons have altered spontaneous  
412 locomotion and sensitivity to cocaine [101], though the cellular mechanisms underlying these behavioral  
413 effects are not known. Our findings provide evidence of a direct association between GRK-2 and D2-type  
414 receptor signaling that regulates locomotion in an *in vivo* system.

415 In *C. elegans*, the  $G_q$  and  $G_o$  pathways act in opposite ways to regulate locomotion by controlling  
416 synaptic vesicle release [82].  $G_q$  acts as a positive regulator of acetylcholine release while  $G_o$  negatively  
417 regulates  $G_q$  signaling, through activation of the  $G_q$  RGS EAT-16 and the diacylglycerol kinase DGK-1. DGK-1  
418 phosphorylates the second messenger DAG and thus inhibits its action. Using genetic epistasis, we  
419 demonstrated that GRK-2 acts upstream of GOA-1/ $G_o$  and EAT-16 to positively regulate locomotion and  
420 body posture. Given this result, our cell-specific rescue data, and our data indicating that GRK-2 acts as a  
421 GPCR kinase for a locomotion-related GPCR, we propose that GRK-2 acts as a kinase for the  $G_o$ -coupled  
422 GPCR DOP-3 in premotor interneurons. In this model, GRK-2 driven phosphorylation of DOP-3 reduces  $G_o$   
423 signaling and thereby activates  $G_q$  signaling (Fig 9). Inhibition of  $G_o$  by GRK-2 could promote  $G_q$ -Rho



424 signaling by two mechanisms: (1) by inhibiting the G<sub>q</sub> RGS EAT-16 and thus activating G<sub>q</sub> itself, and (2) by  
425 inhibiting DGK-1 which acts in parallel to G<sub>q</sub>-Rho to regulate DAG levels (Fig 9).

426 Interestingly, a *grk-2* mutant is suppressed by mutations in *goa-1* and *eat-16*, but not by *dgk-1*. This  
427 finding supports other literature that suggests that *goa-1* and *eat-16* have similar interactions with G<sub>q</sub>  
428 signaling, but that *dgk-1* is distinct [87,102]. GOA-1 and EAT-16 act upstream of G<sub>q</sub> to inhibit G<sub>q</sub> signaling.  
429 DGK-1, on the other hand, acts downstream of G<sub>q</sub> to reduce the pool of the G<sub>q</sub>-generated second  
430 messenger DAG. Adding to the complexity, DAG levels may be controlled by both the PLCβ and Rho  
431 branches of the G<sub>q</sub> pathway (Fig 9). Previously, it has been shown that mutations in *dgk-1* partially  
432 suppress the strong locomotion defect of *egl-30*/G<sub>q</sub> loss-of-function mutations [102]. Surprisingly, we  
433 found that a *grk-2* mutation fully suppresses a *dgk-1* mutant. This suggests that the effect of GRK-2 on  
434 locomotion is more complex and may be partially independent of G<sub>q</sub> signaling and of G<sub>q</sub>-generated DAG.  
435 This agrees with our data showing that GRK-2 has additional neuronal functions that do not depend on  
436 DOP-3.

437 G<sub>q</sub> signaling regulates several genetically separable aspects of locomotion behavior including  
438 locomotion rate and waveform. The G<sub>q</sub>-PLCβ signaling pathway has been reported to act in ventral cord  
439 motor neurons to regulate acetylcholine release and locomotion rate [103], whereas the G<sub>q</sub>-Rho pathway  
440 has been reported to act in at least two different classes of neurons including head acetylcholine neurons  
441 to regulate locomotion rate, waveform, and fainting behavior [12]. Our data here further suggest that  
442 DOP-3, GRK-2, and the G<sub>q</sub>-Rho pathway all act together in the premotor command interneurons to  
443 regulate activity of the NCA channels. The command interneurons have been previously shown to regulate  
444 several aspects of locomotion behavior including the propensity to go forward or reverse [104,105] and  
445 the tendency of the worm to sustain persistent locomotion [43]. Our data here suggest that the command  
446 interneurons also regulate the locomotion rate and the posture of the animals. As we reported previously,  
447 mutations in the Rho-NCA pathway suppress both the locomotion rate and loopy posture of activated G<sub>q</sub>



448 mutants whereas mutations in the PLC $\beta$  pathway suppress mainly the locomotion rate [12]. Thus, G<sub>q</sub> acts  
449 through both the PLC $\beta$  pathway and the Rho-NCA pathway to regulate locomotion rate, probably by acting  
450 in different neurons. By contrast, G<sub>q</sub> acts primarily through the Rho-NCA pathway to regulate the posture  
451 of the worms. This agrees with our data showing that *grk-2* mutations, which affect signaling through the  
452 Rho-NCA pathway, strongly suppress the loopy posture of activated G<sub>q</sub>.

453       The identification of GRK-2 as a putative DOP-3 kinase and positive modulator of G<sub>q</sub>-Rho signaling  
454 connects dopamine signaling to modulation of the NCA channels (Fig 9). NCA channels have been shown in  
455 recent years to be important for neuronal excitability and a number of rhythmic behaviors [16,34–42]. In  
456 humans, mutations affecting the NCA channel NALCN cause neurological diseases [20–33]. However,  
457 despite the relevance of this channel to neuronal function it is unclear how it is gated and activated. Two  
458 studies have shown that NALCN-dependent currents can be activated by G protein-coupled receptors in a  
459 G-protein independent way [44,45] whereas another study showed that NALCN can be activated by low  
460 extracellular calcium via a G protein-dependent pathway [46], but the specific mechanisms remain  
461 unknown. Our results suggest that dopamine acts through the DOP-3 G-protein coupled receptor and  
462 downstream G protein signaling pathways to modulate activity of the NCA channels in a physiologically  
463 relevant setting. This is the first study connecting dopamine to the activation of these important channels.  
464

## 465 **Methods**

### 466 **Strains**

467 Strains were maintained at room temperature or 20° on the OP50 strain of *E. coli* [106].

468 The Supplementary Information contains full genotypes of all the strains we used (S1 Table; List of strains).

469

### 470 **Isolation and identification of the *grk-2(yak18)* mutation**

471 The *grk-2(yak18)* mutant was isolated in an ENU screen as a suppressor of the hyperactive locomotion  
472 and loopy posture of the activated G<sub>q</sub> mutant *egl-30(tg26)* [63]. We mapped the *yak18* mutation to the left  
473 arm of Chromosome III (between -27 and -21.8 m.u.) using a PCR mapping strategy that takes advantage of  
474 PCR length polymorphisms due to indels in the Hawaiian strain CB4856 (Jihong Bai, personal  
475 communication). Using whole-genome sequencing (see below), we found that *yak18* is a G to A transition  
476 mutation in the W02B3.2 (*grk-2*) ORF that creates a G379E missense mutation in the kinase domain of  
477 GRK-2. We confirmed the gene identification by performing a complementation test between *grk-2(yak18)*  
478 and the *grk-2(gk268)* deletion mutant, finding that they fail to complement for the slow locomotion  
479 phenotype.

480

### 481 **Whole-Genome Sequencing**

482 Genomic DNA from *grk-2(yak18)* animals was isolated and purified according to the Worm Genomic  
483 DNA prep protocol from the Hobert lab website ([http://hobertlab.org/wp-](http://hobertlab.org/wp-content/uploads/2013/02/Worm_Genomic_DNA_Prep.pdf)  
484 [content/uploads/2013/02/Worm\\_Genomic\\_DNA\\_Prep.pdf](http://hobertlab.org/wp-content/uploads/2013/02/Worm_Genomic_DNA_Prep.pdf)). The sample was sequenced using Ion Torrent  
485 sequencing (DNA Sequencing Core Facility, University of Utah). The sequencing data were uploaded to the  
486 Galaxy web platform and were analyzed as described [107].

487

### 488 **Constructs and transgenes**

489 The Supplemental Information contains a complete list of constructs used (S2 Table; List of plasmids).  
490 All constructs made in this study were constructed using the multisite Gateway system (Invitrogen).  
491 Specifically, a promoter region, a gene region (cDNA), and an N- or C-terminal 3'UTR or fluorescent tag  
492 (GFP or tagRFP) fused to a 3'UTR were cloned into the destination vector pCFJ150. For the cell-specific  
493 rescuing experiments, an operon GFP was included in the expression constructs downstream of the 3'UTR  
494 [108]. This resulted in expression of untagged *grk-2*, *dop-3*, or *goa-1*, but allowed for confirmation of  
495 proper promoter expression by monitoring GFP expression. The *cho-1* fosmid reporter construct *otIs534*  
496 carries an SL2-spliced nuclear localized YFP::H2B immediately after the stop codon of the *cho-1* gene [93].

497 Extrachromosomal arrays were made by standard injection and transformation methods [109]. In all  
498 cases we injected 5-10 ng/ul of the expression vector and isolated multiple independent lines. At least two  
499 lines were tested that behaved similarly.

500

### 501 **Expression of *grk-2***

502 We made a construct driving expression of the *grk-2* cDNA fused to tagRFP under the *grk-2* promoter  
503 and generated worms with extrachromosomal arrays. For the *grk-2* promoter region, we PCR amplified  
504 2892 bp upstream of the start codon using genomic DNA as a template and the following set of primers:  
505 forward primer 5'cagcagctttccatagtgattgg3' and reverse primer 5'tttttgttctgcaaaatcgaattg3'. *grk-2* was  
506 expressed in neurons in the head, ventral cord, and tail, consistent with the published expression pattern  
507 [52]. Neurons were identified by the stereotypical positions of cells expressing the acetylcholine neuron  
508 reporter *cho-1*<sup>*fosmid*</sup>::SL2::YFP::H2B [93,110] that colocalized with *grk-2*::tagRFP.

509

### 510 **Locomotion and egg-laying assays**

511 For most experiments, we measured locomotion rate using the body bend assay. Specifically, first-day  
512 adults were picked to a three-day-old lawn of OP50 and stimulated by poking the tail of the animal with a

513 worm pick. Body bends were then immediately counted for one minute. A body bend was defined as the  
514 movement of the worm from maximum to minimum amplitude of the sine wave [102]. Specifically for the  
515 experiment described in Fig 5D we used a radial locomotion assay. Animals were placed in the center of 10  
516 cm plates with thin one to two-day-old lawns of OP50 and left for one hour. The position of each worm  
517 was marked and the radial distance from the center of the plate was measured (cm travelled/h).

518 Egg-laying assays were performed as described [80]. L4 larvae were placed on plates with OP50 at 25°C  
519 overnight. The next day, five animals were moved to a fresh plate and allowed to lay eggs at 25°C for two  
520 hours. The number of eggs present on the plate was counted.

521

### 522 **Waveform quantification**

523 First-day adult animals were placed on an OP50 plate and allowed to move forward until when they  
524 had completed five to ten tracks. Each animal's tracks were imaged at 40X magnification using a Nikon  
525 SMZ18 microscope with the DS-L3 camera control system. Period and 2X amplitude were measured using  
526 the line tool in Image J. For each worm, five period/ amplitude ratios were averaged and five worms were  
527 used per experiment.

528

### 529 **Fainting assays**

530 The fainting phenotype is characterized by frequent arrest of locomotion, accompanied by a  
531 straightening of the anterior part of the body. We scored fainting as a sudden halt in movement  
532 accompanied by a straightened posture.

533 First-day adults were transferred to plates with two to three-day-old lawns of OP50 and left  
534 undisturbed for one minute. Animals were then poked either on the head (for backward movement) or on  
535 the tail (for forward movement), and we counted the number of body bends before the animal faints. If  
536 the animal made ten body bends, the assay was stopped and we recorded ten as the number. Thus,

537 animals that never faint (for example, wild-type) are scored as 10 in these experiments. Specifically for the  
538 experiment described in Fig 7D the number reported was the percentage of animals that fainted before  
539 making 10 body bends.

540

#### 541 **Swimming assays**

542 Single, first-day adults were transferred to a 25 ul drop of M9 buffer at the center of an empty NGM  
543 plate and video recorded for 30 sec. The swimming behavior was analyzed as described [38,64].

544

#### 545 **Body length measurements**

546 First-day adults were mounted on 2% agarose pads and anesthetized in M9 buffer containing 50 mM  
547 sodium azide for ten minutes. The image of each animal was obtained using a Nikon 80i wide-field  
548 compound microscope. Body size was measured using ImageJ software.

549

#### 550 **Dopamine resistance assays**

551 We used a method similar to the one described [61]. Specifically, first-day adults were transferred to  
552 plates containing dopamine (5 mM, 10 mM, 15 mM, 20 mM, 40 mM) and incubated for 20 min at room  
553 temperature. Animals were then poked using a worm-pick and the number of body bends was counted,  
554 stopping the assay at 10 body bends. We report the percent of animals that moved 10 body bends without  
555 stopping (Percent of animals moving). A body bend was defined as the movement of the worm from  
556 maximum to minimum amplitude of the sine wave. Dopamine plates were prepared fresh just before use,  
557 as described [61].

558

## 559 Immunoblotting

560 For the Western analysis shown in Figure 2G, worm lysates were prepared as follows. Ten transgenic  
561 animals from each strain were transferred to a 6 cm OP50 plate and grown until most of their progeny had  
562 reached adult stage. Animals from five such plates were washed off with M9, collected in a 15 ml Falcon  
563 tube, and spun down at 2000 rpm for 3 min. Animals were washed twice with M9. The pelleted worms  
564 were then resuspended in 2X SDS loading dye and lysed by incubation at 95°C for 20 min. For the Western  
565 analysis shown in Figure S7B, worm lysates were prepared as follows. Two hundred transgenic worms  
566 were individually picked and transferred in a microfuge tube in 10 ul M9. An equal volume of 2X SDS  
567 loading dye was added to the tube and the animals were lysed by incubation at 95°C for 20 min.

568 Samples were resolved on 10% SDS-polyacrylamide gels and blotted onto PVDF membranes. To detect  
569 the desired proteins, we added the following primary antibodies: monoclonal anti-GRK2/3, clone C5/1.1  
570 (1:1000, EMD Millipore #05-465), monoclonal anti-beta-tubulin antibody (1:1000, ThermoFisher, BT7R,  
571 #MA5-16308), rabbit polyclonal anti-GFP (1:1000, Santa Cruz #sc-8334), and monoclonal anti-mCherry  
572 (1:50, a gift from Jihong Bai and the Fred Hutchinson Cancer Research Center antibody development  
573 shared resource center). The secondary antibodies were an Alexa Fluor 680-conjugated goat anti-mouse  
574 antibody (1:20,000, Jackson Laboratory #115-625-144) and an Alexa Fluor 680-conjugated goat anti-rabbit  
575 antibody (1:20,000, Jackson Laboratory #115-625-166). A LI-COR processor was used to develop images.

576

## 577 Imaging

578 For fluorescence imaging, first-day adult animals were mounted on 2% agarose pads and anesthetized  
579 with 50 mM sodium azide for ten minutes before placing the cover slip. The images shown in Figures 3D  
580 and S7C were obtained using an Olympus FLUOVIEW FV1200 confocal microscope. The images shown in  
581 Figure 8A were acquired using a Zeiss confocal microscope (LSM880) with Z-stack analysis and  
582 reconstruction performed using the ZEN software tool.

583 For pictures of worms, first-day adult animals were placed on an assay plate and photographed at 50  
584 or 60X using a Nikon SMZ18 dissecting microscope with a DS-L3 camera control system. The images were  
585 processed using ImageJ.

586

## 587 **Statistics**

588 P values were determined using GraphPad Prism 5.0d (GraphPad Software). Normally distributed data  
589 sets requiring multiple comparisons were analyzed by a one-way ANOVA followed by a Bonferroni or  
590 Dunnett test. Normally distributed pairwise data comparisons were analyzed by two-tailed unpaired t  
591 tests. Non-normally distributed data sets with multiple comparisons were analyzed by a Kruskal-Wallis  
592 nonparametric ANOVA followed by Dunn's test to examine selected comparisons. Non-normally  
593 distributed pairwise data comparisons were analyzed by a Mann-Whitney test. For the experiments shown  
594 in Figures S3C and S6F a chi-square test for multiple comparisons was used.

595

## 596 **Acknowledgments**

597 Special thanks to Denise Ferkey and Jordan Wood for generously providing the *grk-2* mutant  
598 constructs, Jihong Bai for discussions and sharing unpublished methods and equipment, Yongming Dong  
599 for help with the swimming assay, Ithai Rabinowitch for the *sra-11* promoter plasmid, Jill Hoyt for making  
600 the *grk-2; nlf-1* double mutant, Jill Hoyt and Jordan Hoyt for help with the analysis of the whole-genome  
601 sequencing data, Jérôme Cattin-Ortolá for help with confocal microscopy, Dana Miller for sharing  
602 equipment, Oliver Hobert for providing materials and methodology, and Brian Kraemer and Rebecca Kow  
603 for insightful ideas. Some strains were provided by the CGC, which is funded by the NIH Office of Research  
604 Infrastructure Programs (P40 OD010440).

605

## 606 Author Contributions

607 IT and MA conceived and designed the experiments. IT and KC performed the experiments. LP identified  
608 the head acetylcholine neurons where *grk-2* is expressed. IT and MA wrote the paper.

## 609 References

- 610 1. Wilkie TM, Gilbert DJ, Olsen AS, Chen XN, Amatruda TT, Korenberg JR, et al. Evolution of the  
611 mammalian G protein alpha subunit multigene family. *Nat Genet.* 1992;1: 85–91.  
612 doi:10.1038/ng0592-85
- 613 2. Coulon P, Kanyshkova T, Broicher T, Munsch T, Wettschureck N, Seidenbecher T, et al. Activity Modes  
614 in Thalamocortical Relay Neurons are Modulated by G(q)/G(11) Family G-proteins - Serotonergic and  
615 Glutamatergic Signaling. *Front Cell Neurosci.* 2010;4: 132. doi:10.3389/fncel.2010.00132
- 616 3. Gamper N, Reznikov V, Yamada Y, Yang J, Shapiro MS. Phosphatidylinositol 4,5-bisphosphate signals  
617 underlie receptor-specific Gq/11-mediated modulation of N-type Ca<sup>2+</sup> channels. *J Neurosci.* 2004;24:  
618 10980–10992. doi:10.1523/JNEUROSCI.3869-04.2004
- 619 4. Krause M, Offermanns S, Stocker M, Pedarzani P. Functional specificity of G alpha q and G alpha 11 in  
620 the cholinergic and glutamatergic modulation of potassium currents and excitability in hippocampal  
621 neurons. *J Neurosci.* 2002;22: 666–673.
- 622 5. Lutz S, Freichel-Blomquist A, Yang Y, Rümenapp U, Jakobs KH, Schmidt M, et al. The guanine  
623 nucleotide exchange factor p63RhoGEF, a specific link between Gq/11-coupled receptor signaling and  
624 RhoA. *J Biol Chem.* 2005;280: 11134–11139. doi:10.1074/jbc.M411322200



- 625 6. Lutz S, Shankaranarayanan A, Coco C, Ridilla M, Nance MR, Vettel C, et al. Structure of Galphaq-  
626 p63RhoGEF-RhoA complex reveals a pathway for the activation of RhoA by GPCRs. *Science*. 2007;318:  
627 1923–1927. doi:10.1126/science.1147554
- 628 7. Rojas RJ, Yohe ME, Gershburg S, Kawano T, Kozasa T, Sondek J. Galphaq directly activates p63RhoGEF  
629 and Trio via a conserved extension of the Dbl homology-associated pleckstrin homology domain. *J*  
630 *Biol Chem*. 2007;282: 29201–29210. doi:10.1074/jbc.M703458200
- 631 8. Williams SL, Lutz S, Charlie NK, Vettel C, Ailion M, Coco C, et al. Trio’s Rho-specific GEF domain is the  
632 missing Galpha q effector in *C. elegans*. *Genes Dev*. 2007;21: 2731–2746. doi:10.1101/gad.1592007
- 633 9. Chan JP, Hu Z, Sieburth D. Recruitment of sphingosine kinase to presynaptic terminals by a conserved  
634 muscarinic signaling pathway promotes neurotransmitter release. *Genes Dev*. 2012;26: 1070–1085.  
635 doi:10.1101/gad.188003.112
- 636 10. Hiley E, McMullan R, Nurrish SJ. The Galpha12-RGS RhoGEF-RhoA signalling pathway regulates  
637 neurotransmitter release in *C. elegans*. *EMBO J*. 2006;25: 5884–5895. doi:10.1038/sj.emboj.7601458
- 638 11. McMullan R, Hiley E, Morrison P, Nurrish SJ. Rho is a presynaptic activator of neurotransmitter  
639 release at pre-existing synapses in *C. elegans*. *Genes Dev*. 2006;20: 65–76. doi:10.1101/gad.359706
- 640 12. Topalidou I, Chen P-A, Cooper K, Watanabe S, Jorgensen EM, Ailion M. The NCA-1 and NCA-2 ion  
641 channels function downstream of Gq and Rho to regulate locomotion in *Caenorhabditis elegans*.  
642 *Genetics*. 2017;206: 265–282. doi:10.1534/genetics.116.198820
- 643 13. Ren D. Sodium leak channels in neuronal excitability and rhythmic behaviors. *Neuron*. 2011;72: 899–  
644 911. doi:10.1016/j.neuron.2011.12.007

- 645 14. Liebeskind BJ, Hillis DM, Zakon HH. Phylogeny unites animal sodium leak channels with fungal calcium  
646 channels in an ancient, voltage-insensitive clade. *Mol Biol Evol.* 2012;29: 3613–3616.  
647 doi:10.1093/molbev/mss182
- 648 15. Lee JH, Cribbs LL, Perez-Reyes E. Cloning of a novel four repeat protein related to voltage-gated  
649 sodium and calcium channels. *FEBS Lett.* 1999;445: 231–236.
- 650 16. Lu B, Su Y, Das S, Liu J, Xia J, Ren D. The neuronal channel NALCN contributes resting sodium  
651 permeability and is required for normal respiratory rhythm. *Cell.* 2007;129: 371–383.  
652 doi:10.1016/j.cell.2007.02.041
- 653 17. Boone AN, Senatore A, Chemin J, Monteil A, Spafford JD. Gd<sup>3+</sup> and calcium sensitive, sodium leak  
654 currents are features of weak membrane-glass seals in patch clamp recordings. *PloS One.* 2014;9:  
655 e98808. doi:10.1371/journal.pone.0098808
- 656 18. Senatore A, Spafford JD. A uniquely adaptable pore is consistent with NALCN being an ion sensor.  
657 *Channels.* 2013;7: 60–68. doi:10.4161/chan.23981
- 658 19. Senatore A, Monteil A, van Minnen J, Smit AB, Spafford JD. NALCN ion channels have alternative  
659 selectivity filters resembling calcium channels or sodium channels. *PloS One.* 2013;8: e55088.  
660 doi:10.1371/journal.pone.0055088
- 661 20. Al-Sayed MD, Al-Zaidan H, Albakheet A, Hakami H, Kenana R, Al-Yafee Y, et al. Mutations in NALCN  
662 cause an autosomal-recessive syndrome with severe hypotonia, speech impairment, and cognitive  
663 delay. *Am J Hum Genet.* 2013;93: 721–726. doi:10.1016/j.ajhg.2013.08.001

- 664 21. Chong JX, McMillin MJ, Shively KM, Beck AE, Marvin CT, Armenteros JR, et al. De novo mutations in  
665 NALCN cause a syndrome characterized by congenital contractures of the limbs and face, hypotonia,  
666 and developmental delay. *Am J Hum Genet.* 2015;96: 462–473. doi:10.1016/j.ajhg.2015.01.003
- 667 22. Fukai R, Saitsu H, Okamoto N, Sakai Y, Fattal-Valevski A, Masaaki S, et al. De novo missense mutations  
668 in NALCN cause developmental and intellectual impairment with hypotonia. *J Hum Genet.* 2016;61:  
669 451–455. doi:10.1038/jhg.2015.163
- 670 23. Aoyagi K, Rossignol E, Hamdan FF, Mulcahy B, Xie L, Nagamatsu S, et al. A Gain-of-Function Mutation  
671 in NALCN in a Child with Intellectual Disability, Ataxia, and Arthrogryposis. *Hum Mutat.* 2015;36: 753–  
672 757. doi:10.1002/humu.22797
- 673 24. Bend EG, Si Y, Stevenson DA, Bayrak-Toydemir P, Newcomb TM, Jorgensen EM, et al. NALCN  
674 channelopathies: Distinguishing gain-of-function and loss-of-function mutations. *Neurology.* 2016;87:  
675 1131–1139. doi:10.1212/WNL.0000000000003095
- 676 25. Gal M, Magen D, Zahran Y, Ravid S, Eran A, Khayat M, et al. A novel homozygous splice site mutation  
677 in NALCN identified in siblings with cachexia, strabismus, severe intellectual disability, epilepsy and  
678 abnormal respiratory rhythm. *Eur J Med Genet.* 2016;59: 204–209. doi:10.1016/j.ejmg.2016.02.007
- 679 26. Karakaya M, Heller R, Kunde V, Zimmer K-P, Chao C-M, Nürnberg P, et al. Novel Mutations in the  
680 Nonselective Sodium Leak Channel (NALCN) Lead to Distal Arthrogryposis with Increased Muscle  
681 Tone. *Neuropediatrics.* 2016;47: 273–277. doi:10.1055/s-0036-1584084
- 682 27. Köroğlu Ç, Seven M, Tolun A. Recessive truncating NALCN mutation in infantile neuroaxonal  
683 dystrophy with facial dysmorphism. *J Med Genet.* 2013;50: 515–520. doi:10.1136/jmedgenet-2013-  
684 101634

- 685 28. Perez Y, Kadir R, Volodarsky M, Noyman I, Flusser H, Shorer Z, et al. UNC80 mutation causes a  
686 syndrome of hypotonia, severe intellectual disability, dyskinesia and dysmorphism, similar to that  
687 caused by mutations in its interacting cation channel NALCN. *J Med Genet.* 2016;53: 397–402.  
688 doi:10.1136/jmedgenet-2015-103352
- 689 29. Valkanas E, Schaffer K, Dunham C, Maduro V, du Souich C, Rupps R, et al. Phenotypic evolution of  
690 UNC80 loss of function. *Am J Med Genet A.* 2016;170: 3106–3114. doi:10.1002/ajmg.a.37929
- 691 30. Shamseldin HE, Fageih E, Alasmari A, Zaki MS, Gleeson JG, Alkuraya FS. Mutations in UNC80, Encoding  
692 Part of the UNC79-UNC80-NALCN Channel Complex, Cause Autosomal-Recessive Severe Infantile  
693 Encephalopathy. *Am J Hum Genet.* 2016;98: 210–215. doi:10.1016/j.ajhg.2015.11.013
- 694 31. Stray-Pedersen A, Cobben J-M, Prescott TE, Lee S, Cang C, Aranda K, et al. Biallelic Mutations in  
695 UNC80 Cause Persistent Hypotonia, Encephalopathy, Growth Retardation, and Severe Intellectual  
696 Disability. *Am J Hum Genet.* 2016;98: 202–209. doi:10.1016/j.ajhg.2015.11.004
- 697 32. Wang Y, Koh K, Ichinose Y, Yasumura M, Ohtsuka T, Takiyama Y. A de novo mutation in the NALCN  
698 gene in an adult patient with cerebellar ataxia associated with intellectual disability and  
699 arthrogyriposis. *Clin Genet.* 2016;90: 556–557. doi:10.1111/cge.12851
- 700 33. Lozic B, Johansson S, Lovric Kojundzic S, Markic J, Knappskog PM, Hahn AF, et al. Novel NALCN  
701 variant: altered respiratory and circadian rhythm, anesthetic sensitivity. *Ann Clin Transl Neurol.*  
702 2016;3: 876–883. doi:10.1002/acn3.362
- 703 34. Funato H, Miyoshi C, Fujiyama T, Kanda T, Sato M, Wang Z, et al. Forward-genetics analysis of sleep in  
704 randomly mutagenized mice. *Nature.* 2016;539: 378–383. doi:10.1038/nature20142

- 705 35. Humphrey JA, Hamming KS, Thacker CM, Scott RL, Sedensky MM, Snutch TP, et al. A putative cation  
706 channel and its novel regulator: cross-species conservation of effects on general anesthesia. *Curr Biol.*  
707 2007;17: 624–629. doi:10.1016/j.cub.2007.02.037
- 708 36. Jospin M, Watanabe S, Joshi D, Young S, Hamming K, Thacker C, et al. UNC-80 and the NCA ion  
709 channels contribute to endocytosis defects in synaptojanin mutants. *Curr Biol.* 2007;17: 1595–1600.  
710 doi:10.1016/j.cub.2007.08.036
- 711 37. Nash HA, Scott RL, Lear BC, Allada R. An unusual cation channel mediates photic control of  
712 locomotion in *Drosophila*. *Curr Biol.* 2002;12: 2152–2158.
- 713 38. Pierce-Shimomura JT, Chen BL, Mun JJ, Ho R, Sarkis R, McIntire SL. Genetic analysis of crawling and  
714 swimming locomotory patterns in *C. elegans*. *Proc Natl Acad Sci U S A.* 2008;105: 20982–20987.  
715 doi:10.1073/pnas.0810359105
- 716 39. Yeh E, Ng S, Zhang M, Bouhours M, Wang Y, Wang M, et al. A putative cation channel, NCA-1, and a  
717 novel protein, UNC-80, transmit neuronal activity in *C. elegans*. *PLoS Biol.* 2008;6: e55.  
718 doi:10.1371/journal.pbio.0060055
- 719 40. Lear BC, Darrah EJ, Aldrich BT, Gebre S, Scott RL, Nash HA, et al. UNC79 and UNC80, Putative Auxiliary  
720 Subunits of the NARROW ABDOMEN Ion Channel, Are Indispensable for Robust Circadian Locomotor  
721 Rhythms in *Drosophila*. *PLoS One.* 2013;8: e78147. doi:10.1371/journal.pone.0078147
- 722 41. Lear BC, Lin J-M, Keath JR, McGill JJ, Raman IM, Allada R. The ion channel narrow abdomen is critical  
723 for neural output of the *Drosophila* circadian pacemaker. *Neuron.* 2005;48: 965–976.  
724 doi:10.1016/j.neuron.2005.10.030

- 725 42. Yeh S-Y, Huang W-H, Wang W, Ward CS, Chao ES, Wu Z, et al. Respiratory Network Stability and  
726 Modulatory Response to Substance P Require Nalcn. *Neuron*. 2017;94: 294–303.  
727 doi:10.1016/j.neuron.2017.03.024
- 728 43. Gao S, Xie L, Kawano T, Po MD, Pirri JK, Guan S, et al. The NCA sodium leak channel is required for  
729 persistent motor circuit activity that sustains locomotion. *Nat Commun*. 2015;6: 6323.  
730 doi:10.1038/ncomms7323
- 731 44. Lu B, Su Y, Das S, Wang H, Wang Y, Liu J, et al. Peptide neurotransmitters activate a cation channel  
732 complex of NALCN and UNC-80. *Nature*. 2009;457: 741–744. doi:10.1038/nature07579
- 733 45. Swayne LA, Mezghrani A, Varrault A, Chemin J, Bertrand G, Dalle S, et al. The NALCN ion channel is  
734 activated by M3 muscarinic receptors in a pancreatic beta-cell line. *EMBO Rep*. 2009;10: 873–880.  
735 doi:10.1038/embor.2009.125
- 736 46. Lu B, Zhang Q, Wang H, Wang Y, Nakayama M, Ren D. Extracellular calcium controls background  
737 current and neuronal excitability via an UNC79-UNC80-NALCN cation channel complex. *Neuron*.  
738 2010;68: 488–499. doi:10.1016/j.neuron.2010.09.014
- 739 47. Ferguson SS. Evolving concepts in G protein-coupled receptor endocytosis: the role in receptor  
740 desensitization and signaling. *Pharmacol Rev*. 2001;53: 1–24.
- 741 48. Wood JF, Wang J, Benovic JL, Ferkey DM. Structural domains required for *Caenorhabditis elegans* G  
742 protein-coupled receptor kinase 2 (GRK-2) function in vivo. *J Biol Chem*. 2012;287: 12634–12644.  
743 doi:10.1074/jbc.M111.336818

- 744 49. Benovic JL, Onorato JJ, Arriza JL, Stone WC, Lohse M, Jenkins NA, et al. Cloning, expression, and  
745 chromosomal localization of beta-adrenergic receptor kinase 2. A new member of the receptor kinase  
746 family. *J Biol Chem.* 1991;266: 14939–14946.
- 747 50. Schleicher S, Boekhoff I, Arriza J, Lefkowitz RJ, Breer H. A beta-adrenergic receptor kinase-like enzyme  
748 is involved in olfactory signal termination. *Proc Natl Acad Sci U S A.* 1993;90: 1420–1424.
- 749 51. Jaber M, Koch WJ, Rockman H, Smith B, Bond RA, Sulik KK, et al. Essential role of beta-adrenergic  
750 receptor kinase 1 in cardiac development and function. *Proc Natl Acad Sci U S A.* 1996;93: 12974–  
751 12979.
- 752 52. Fukuto HS, Ferkey DM, Apicella AJ, Lans H, Sharmeen T, Chen W, et al. G protein-coupled receptor  
753 kinase function is essential for chemosensation in *C. elegans*. *Neuron.* 2004;42: 581–593.
- 754 53. Wang J, Luo J, Aryal DK, Wetsel WC, Nass R, Benovic JL. G protein-coupled receptor kinase-2 (GRK-2)  
755 regulates serotonin metabolism through the monoamine oxidase AMX-2 in *Caenorhabditis elegans*. *J*  
756 *Biol Chem.* 2017;292: 5943–5956. doi:10.1074/jbc.M116.760850
- 757 54. Pierce KL, Premont RT, Lefkowitz RJ. Seven-transmembrane receptors. *Nat Rev Mol Cell Biol.* 2002;3:  
758 639–650. doi:10.1038/nrm908
- 759 55. Ito K, Haga T, Lamah J, Sadée W. Sequestration of dopamine D2 receptors depends on coexpression  
760 of G-protein-coupled receptor kinases 2 or 5. *Eur J Biochem.* 1999;260: 112–119. doi:10.1046/j.1432-  
761 1327.1999.00125.x
- 762 56. Kim KM, Valenzano KJ, Robinson SR, Yao WD, Barak LS, Caron MG. Differential regulation of the  
763 dopamine D2 and D3 receptors by G protein-coupled receptor kinases and beta-arrestins. *J Biol*  
764 *Chem.* 2001;276: 37409–37414. doi:10.1074/jbc.M106728200

- 765 57. Cho D, Zheng M, Min C, Ma L, Kurose H, Park JH, et al. Agonist-induced endocytosis and receptor  
766 phosphorylation mediate resensitization of dopamine D(2) receptors. *Mol Endocrinol.* 2010;24: 574–  
767 586. doi:10.1210/me.2009-0369
- 768 58. Namkung Y, Dipace C, Javitch JA, Sibley DR. G protein-coupled receptor kinase-mediated  
769 phosphorylation regulates post-endocytic trafficking of the D2 dopamine receptor. *J Biol Chem.*  
770 2009;284: 15038–15051. doi:10.1074/jbc.M900388200
- 771 59. Gurevich EV, Gainetdinov RR, Gurevich VV. G protein-coupled receptor kinases as regulators of  
772 dopamine receptor functions. *Pharmacol Res.* 2016;111: 1–16. doi:10.1016/j.phrs.2016.05.010
- 773 60. Sawin ER, Ranganathan R, Horvitz HR. *C. elegans* locomotory rate is modulated by the environment  
774 through a dopaminergic pathway and by experience through a serotonergic pathway. *Neuron.*  
775 2000;26: 619–631.
- 776 61. Chase DL, Pepper JS, Koelle MR. Mechanism of extrasynaptic dopamine signaling in *Caenorhabditis*  
777 *elegans*. *Nat Neurosci.* 2004;7: 1096–1103. doi:10.1038/nn1316
- 778 62. Doi M, Iwasaki K. Regulation of retrograde signaling at neuromuscular junctions by the novel C2  
779 domain protein AEX-1. *Neuron.* 2002;33: 249–259.
- 780 63. Ailion M, Hannemann M, Dalton S, Pappas A, Watanabe S, Heggermann J, et al. Two Rab2 interactors  
781 regulate dense-core vesicle maturation. *Neuron.* 2014;82: 167–180.  
782 doi:10.1016/j.neuron.2014.02.017
- 783 64. Vidal-Gadea A, Topper S, Young L, Crisp A, Kressin L, Elbel E, et al. *Caenorhabditis elegans* selects  
784 distinct crawling and swimming gaits via dopamine and serotonin. *Proc Natl Acad Sci U S A.* 2011;108:  
785 17504–17509. doi:10.1073/pnas.1108673108



- 786 65. Pitcher JA, Freedman NJ, Lefkowitz RJ. G protein-coupled receptor kinases. *Annu Rev Biochem.*  
787 1998;67: 653–692. doi:10.1146/annurev.biochem.67.1.653
- 788 66. Evron T, Daigle TL, Caron MG. GRK2: multiple roles beyond G protein-coupled receptor  
789 desensitization. *Trends Pharmacol Sci.* 2012;33: 154–164. doi:10.1016/j.tips.2011.12.003
- 790 67. Ribas C, Penela P, Murga C, Salcedo A, García-Hoz C, Jurado-Pueyo M, et al. The G protein-coupled  
791 receptor kinase (GRK) interactome: role of GRKs in GPCR regulation and signaling. *Biochim Biophys*  
792 *Acta.* 2007;1768: 913–922. doi:10.1016/j.bbamem.2006.09.019
- 793 68. Kong G, Penn R, Benovic JL. A beta-adrenergic receptor kinase dominant negative mutant attenuates  
794 desensitization of the beta 2-adrenergic receptor. *J Biol Chem.* 1994;269: 13084–13087.
- 795 69. Pao CS, Barker BL, Benovic JL. Role of the amino terminus of G protein-coupled receptor kinase 2 in  
796 receptor phosphorylation. *Biochemistry (Mosc).* 2009;48: 7325–7333. doi:10.1021/bi900408g
- 797 70. Boguth CA, Singh P, Huang C, Tesmer JJG. Molecular basis for activation of G protein-coupled  
798 receptor kinases. *EMBO J.* 2010;29: 3249–3259. doi:10.1038/emboj.2010.206
- 799 71. Huang C, Yoshino-Koh K, Tesmer JJG. A surface of the kinase domain critical for the allosteric  
800 activation of G protein-coupled receptor kinases. *J Biol Chem.* 2009;284: 17206–17215.  
801 doi:10.1074/jbc.M809544200
- 802 72. Huang C-C, Orban T, Jastrzebska B, Palczewski K, Tesmer JJG. Activation of G protein-coupled receptor  
803 kinase 1 involves interactions between its N-terminal region and its kinase domain. *Biochemistry*  
804 *(Mosc).* 2011;50: 1940–1949. doi:10.1021/bi101606e

- 805 73. Noble B, Kallal LA, Pausch MH, Benovic JL. Development of a yeast bioassay to characterize G protein-  
806 coupled receptor kinases. Identification of an NH<sub>2</sub>-terminal region essential for receptor  
807 phosphorylation. *J Biol Chem.* 2003;278: 47466–47476. doi:10.1074/jbc.M308257200
- 808 74. Pao CS, Benovic JL. Phosphorylation-independent desensitization of G protein-coupled receptors? *Sci*  
809 *STKE.* 2002;2002: pe42. doi:10.1126/stke.2002.153.pe42
- 810 75. Sterne-Marr R, Tesmer JGG, Day PW, Stracquatano RP, Cilente J-AE, O'Connor KE, et al. G protein-  
811 coupled receptor Kinase 2/G alpha q/11 interaction. A novel surface on a regulator of G protein  
812 signaling homology domain for binding G alpha subunits. *J Biol Chem.* 2003;278: 6050–6058.  
813 doi:10.1074/jbc.M208787200
- 814 76. Boekhoff I, Inglese J, Schleicher S, Koch WJ, Lefkowitz RJ, Breer H. Olfactory desensitization requires  
815 membrane targeting of receptor kinase mediated by beta gamma-subunits of heterotrimeric G  
816 proteins. *J Biol Chem.* 1994;269: 37–40.
- 817 77. Koch WJ, Inglese J, Stone WC, Lefkowitz RJ. The binding site for the beta gamma subunits of  
818 heterotrimeric G proteins on the beta-adrenergic receptor kinase. *J Biol Chem.* 1993;268: 8256–8260.
- 819 78. Touhara K, Koch WJ, Hawes BE, Lefkowitz RJ. Mutational analysis of the pleckstrin homology domain  
820 of the beta-adrenergic receptor kinase. Differential effects on G beta gamma and  
821 phosphatidylinositol 4,5-bisphosphate binding. *J Biol Chem.* 1995;270: 17000–17005.
- 822 79. Carman CV, Barak LS, Chen C, Liu-Chen LY, Onorato JJ, Kennedy SP, et al. Mutational analysis of  
823 Gbetagamma and phospholipid interaction with G protein-coupled receptor kinase 2. *J Biol Chem.*  
824 2000;275: 10443–10452.

- 825 80. Topalidou I, Cattin-Ortolá J, Pappas AL, Cooper K, Merrihew GE, MacCoss MJ, et al. The EARP Complex  
826 and Its Interactor EIPR-1 Are Required for Cargo Sorting to Dense-Core Vesicles. *PLoS Genet.* 2016;12:  
827 e1006074. doi:10.1371/journal.pgen.1006074
- 828 81. Hammarlund M, Palfreyman MT, Watanabe S, Olsen S, Jorgensen EM. Open syntaxin docks synaptic  
829 vesicles. *PLoS Biol.* 2007;5: e198. doi:10.1371/journal.pbio.0050198
- 830 82. Koelle MR. Neurotransmitter signaling through heterotrimeric G proteins: insights from studies in *C.*  
831 *elegans*. *WormBook Online Rev C Elegans Biol.* 2016; 1–78. doi:10.1895/wormbook.1.75.2
- 832 83. Bastiani CA, Gharib S, Simon MI, Sternberg PW. *Caenorhabditis elegans* Galphaq regulates egg-laying  
833 behavior via a PLCbeta-independent and serotonin-dependent signaling pathway and likely functions  
834 both in the nervous system and in muscle. *Genetics.* 2003;165: 1805–1822.
- 835 84. Brundage L, Avery L, Katz A, Kim UJ, Mendel JE, Sternberg PW, et al. Mutations in a *C. elegans*  
836 Gqalpha gene disrupt movement, egg laying, and viability. *Neuron.* 1996;16: 999–1009.
- 837 85. Mendel JE, Korswagen HC, Liu KS, Hajdu-Cronin YM, Simon MI, Plasterk RH, et al. Participation of the  
838 protein Go in multiple aspects of behavior in *C. elegans*. *Science.* 1995;267: 1652–1655.
- 839 86. Ségalat L, Elkes DA, Kaplan JM. Modulation of serotonin-controlled behaviors by Go in *Caenorhabditis*  
840 *elegans*. *Science.* 1995;267: 1648–1651.
- 841 87. Hajdu-Cronin YM, Chen WJ, Patikoglou G, Koelle MR, Sternberg PW. Antagonism between G(o)alpha  
842 and G(q)alpha in *Caenorhabditis elegans*: the RGS protein EAT-16 is necessary for G(o)alpha signaling  
843 and regulates G(q)alpha activity. *Genes Dev.* 1999;13: 1780–1793.
- 844 88. Nurrish S, Ségalat L, Kaplan JM. Serotonin inhibition of synaptic transmission: Galpha(0) decreases the  
845 abundance of UNC-13 at release sites. *Neuron.* 1999;24: 231–242.

- 846 89. Sawin ER, Ranganathan R, Horvitz HR. *C. elegans* locomotory rate is modulated by the environment  
847 through a dopaminergic pathway and by experience through a serotonergic pathway. *Neuron*.  
848 2000;26: 619–631.
- 849 90. Lints R, Emmons SW. Patterning of dopaminergic neurotransmitter identity among *Caenorhabditis*  
850 *elegans* ray sensory neurons by a TGFbeta family signaling pathway and a Hox gene. *Development*.  
851 1999;126: 5819–5831.
- 852 91. Xie L, Gao S, Alcaire SM, Aoyagi K, Wang Y, Griffin JK, et al. NLF-1 delivers a sodium leak channel to  
853 regulate neuronal excitability and modulate rhythmic locomotion. *Neuron*. 2013;77: 1069–1082.  
854 doi:10.1016/j.neuron.2013.01.018
- 855 92. Koelle MR, Horvitz HR. EGL-10 regulates G protein signaling in the *C. elegans* nervous system and  
856 shares a conserved domain with many mammalian proteins. *Cell*. 1996;84: 115–125.
- 857 93. Stefanakis N, Carrera I, Hobert O. Regulatory Logic of Pan-Neuronal Gene Expression in *C. elegans*.  
858 *Neuron*. 2015;87: 733–750. doi:10.1016/j.neuron.2015.07.031
- 859 94. Zhang F, Bhattacharya A, Nelson JC, Abe N, Gordon P, Lloret-Fernandez C, et al. The LIM and POU  
860 homeobox genes *ttx-3* and *unc-86* act as terminal selectors in distinct cholinergic and serotonergic  
861 neuron types. *Development*. 2014;141: 422–435. doi:10.1242/dev.099721
- 862 95. Wenick AS, Hobert O. Genomic cis-regulatory architecture and trans-acting regulators of a single  
863 interneuron-specific gene battery in *C. elegans*. *Dev Cell*. 2004;6: 757–770.  
864 doi:10.1016/j.devcel.2004.05.004

- 865 96. Ezak MJ, Ferkey DM. The *C. elegans* D2-like dopamine receptor DOP-3 decreases behavioral  
866 sensitivity to the olfactory stimulus 1-octanol. *PLoS One*. 2010;5: e9487.  
867 doi:10.1371/journal.pone.0009487
- 868 97. Ferkey DM, Hyde R, Haspel G, Dionne HM, Hess HA, Suzuki H, et al. *C. elegans* G protein regulator  
869 RGS-3 controls sensitivity to sensory stimuli. *Neuron*. 2007;53: 39–52.  
870 doi:10.1016/j.neuron.2006.11.015
- 871 98. Wragg RT, Hapiak V, Miller SB, Harris GP, Gray J, Komuniecki PR, et al. Tyramine and octopamine  
872 independently inhibit serotonin-stimulated aversive behaviors in *Caenorhabditis elegans* through two  
873 novel amine receptors. *J Neurosci*. 2007;27: 13402–13412. doi:10.1523/JNEUROSCI.3495-07.2007
- 874 99. Shiina T, Arai K, Tanabe S, Yoshida N, Haga T, Nagao T, et al. Clathrin box in G protein-coupled  
875 receptor kinase 2. *J Biol Chem*. 2001;276: 33019–33026. doi:10.1074/jbc.M100140200
- 876 100. Namkung Y, Dipace C, Urizar E, Javitch JA, Sibley DR. G protein-coupled receptor kinase-2  
877 constitutively regulates D2 dopamine receptor expression and signaling independently of receptor  
878 phosphorylation. *J Biol Chem*. 2009;284: 34103–34115. doi:10.1074/jbc.M109.055707
- 879 101. Daigle TL, Ferris MJ, Gainetdinov RR, Sotnikova TD, Urs NM, Jones SR, et al. Selective deletion of GRK2  
880 alters psychostimulant-induced behaviors and dopamine neurotransmission.  
881 *Neuropsychopharmacology*. 2014;39: 2450–2462. doi:10.1038/npp.2014.97
- 882 102. Miller KG, Emerson MD, Rand JB. Gαq and diacylglycerol kinase negatively regulate the Gαq pathway in *C. elegans*. *Neuron*. 1999;24: 323–333.  
883

- 884 103. Lackner MR, Nurrish SJ, Kaplan JM. Facilitation of synaptic transmission by EGL-30 Gqalpha and EGL-8  
885 PLCbeta: DAG binding to UNC-13 is required to stimulate acetylcholine release. *Neuron*. 1999;24:  
886 335–346.
- 887 104. Chalfie M, Sulston JE, White JG, Southgate E, Thomson JN, Brenner S. The neural circuit for touch  
888 sensitivity in *Caenorhabditis elegans*. *J Neurosci*. 1985;5: 956–964.
- 889 105. Zheng Y, Brockie PJ, Mellem JE, Madsen DM, Maricq AV. Neuronal control of locomotion in *C. elegans*  
890 is modified by a dominant mutation in the GLR-1 ionotropic glutamate receptor. *Neuron*. 1999;24:  
891 347–361.
- 892 106. Brenner S. The genetics of *Caenorhabditis elegans*. *Genetics*. 1974;77: 71–94.
- 893 107. Hoyt JM, Wilson SK, Kasa M, Rise JS, Topalidou I, Ailion M. The SEK-1 p38 MAP Kinase Pathway  
894 Modulates Gq Signaling in *Caenorhabditis elegans*. *G3*. 2017;[Epub ahead of print].  
895 doi:10.1534/g3.117.043273
- 896 108. Frøkjær-Jensen C, Davis MW, Ailion M, Jorgensen EM. Improved Mos1-mediated transgenesis in *C.*  
897 *elegans*. *Nat Methods*. 2012;9: 117–118. doi:10.1038/nmeth.1865
- 898 109. Mello CC, Kramer JM, Stinchcomb D, Ambros V. Efficient gene transfer in *C.elegans*:  
899 extrachromosomal maintenance and integration of transforming sequences. *EMBO J*. 1991;10: 3959–  
900 3970.
- 901 110. Pereira L, Kratsios P, Serrano-Saiz E, Sheftel H, Mayo AE, Hall DH, et al. A cellular and regulatory map  
902 of the cholinergic nervous system of *C. elegans*. *eLife*. 2015;4: e12432. doi:10.7554/eLife.12432  
903

## 904 **Figure Captions**

### 905 **Fig 1. The GRK-2 kinase regulates locomotion and G<sub>q</sub> signaling.**

906 (A,B) *grk-2* mutations suppress activated G<sub>q</sub>. The activated G<sub>q</sub> mutant *egl-30(tg26)* (Gq\*) has hyperactive  
907 locomotion and a tightly coiled loopy posture. (A) The *grk-2(gk268)* and *grk-2(yak18)* mutations suppress  
908 the loopy posture of activated G<sub>q</sub>. (B) The *grk-2(gk268)* mutation suppresses the hyperactive locomotion of  
909 activated G<sub>q</sub>. (\*\*\*, P<0.001. Error bars = SEM; n = 10).

910 (C) The kinase activity of GRK-2 is required for proper locomotion. The *grk-2(gk268)* and *grk-2(yak18)*  
911 mutants have slow locomotion. The *grk-2(gk268)* slow locomotion is rescued by expression of the wild-  
912 type *grk-2* cDNA under the control of its own promoter (GRK-2(+)), but is not rescued by expression of the  
913 kinase dead GRK-2[K220R]. (\*\*, P<0.01; \*\*\*, P<0.001. Error bars = SEM; n = 10-15).

914 (D) The kinase dead GRK-2 does not reverse the *grk-2* suppression of activated G<sub>q</sub>. A *grk-2(gk268)*  
915 mutation suppresses the hyperactive locomotion of *egl-30(tg26)* (Gq\*). Expression of the kinase dead GRK-  
916 2[K220R] does not rescue the *grk-2* mutant for this phenotype. (\*\*, P<0.01. Error bars = SEM; n = 10).

917

### 918 **Fig 2. GRK-2 regulation of locomotion requires GPCR-phosphorylation and membrane association.**

919 (A) Domain structure of GRK-2. GRK-2 is a 707 amino acid protein with three well-characterized domains:  
920 the RGS homology (RH) domain, the kinase domain, and the pleckstrin homology (PH) domain. The protein  
921 structure was drawn using DOG 1.0.

922 (B-D) Residues required for GPCR phosphorylation are required for GRK-2 function in locomotion. The D3K  
923 (transgene *yakEx77*), L4K (transgene *yakEx78*), V7A/L8A (transgene *yakEx79*), and D10A (transgene  
924 *yakEx80*) mutations are predicted to block GPCR phosphorylation. The R195A mutation (transgene  
925 *yakEx95*) disrupts predicted intramolecular stabilizing interactions that are required for effective  
926 phosphorylation. In each case, expression of the mutant *grk-2* cDNA under the control of its own promoter

927 did not rescue the slow locomotion of the *grk-2(gk268)* mutant (ns,  $P > 0.05$ , each strain compared to *grk-2*.

928 Error bars = SEM;  $n = 10-20$ ).

929 (E) Residues in the RH domain predicted to disrupt  $G_q$  binding are not required for GRK-2 function in

930 locomotion. The R106A (transgene *yakEx57*), Y109I (transgene *yakEx55*), and D110A (transgene *yakEx56*)

931 mutations are predicted to disrupt  $G_q$  binding. In each case, expression of the mutant *grk-2* cDNA under

932 the control of the *grk-2* promoter significantly rescued the slow locomotion of the *grk-2(gk268)* mutant

933 (\*\*,  $P < 0.01$ ; \*\*\*,  $P < 0.001$ . Error bars = SEM;  $n = 10$ ).

934 (F) Residues in the PH domain predicted to disrupt GRK-2 phospholipid binding or binding to  $G\beta\gamma$  are

935 required for GRK-2 function in locomotion. Mutation K567E (transgene *yakEx87*) is predicted to disrupt

936 GRK-2 phospholipid binding, and mutation R587Q (transgene *yakEx88*) is predicted to disrupt binding to

937  $G\beta\gamma$ . In both cases, expression of the mutant *grk-2* cDNA under the control of the *grk-2* promoter did not

938 rescue the slow locomotion of the *grk-2(gk268)* mutant. (\*\*,  $P < 0.01$ . ns,  $P > 0.05$ . Error bars = SEM;  $n = 10$ ).

939 (G) Verification of the expression of the mutant *grk-2* cDNAs used for the experiments shown in Figure 1D

940 and Figure 2B-F. Western blot analysis of whole worm extracts from *grk-2(gk268)* mutants expressing the

941 indicated *grk-2* mutant cDNAs as extrachromosomal arrays.

942

### 943 **Fig 3. GRK-2 acts in head acetylcholine neurons.**

944 (A) *grk-2* acts in head acetylcholine neurons to control locomotion. The *grk-2* cDNA was expressed in *grk-*

945 *2(gk268)* mutants under a pan-neuronal promoter (*Prab-3*, transgene *yakEx44*), acetylcholine neuron

946 promoter (*Punc-17*, transgene *yakEx45*), ventral cord acetylcholine motor neuron promoter (*Pacr-2*,

947 transgene *yakEx47*), head acetylcholine neuron promoter (*Punc-17H*, transgene *yakEx51*), glutamate

948 receptor promoter (*Pglr-1*, transgene *yakEx52*), and ciliated sensory neuron promoter (*Pxbx-1*, transgene

949 *yakEx71*). Expression driven by the pan-neuronal, acetylcholine neuron, and head acetylcholine neuron

950 promoters rescued the slow locomotion of *grk-2* mutants. (\*\*\*,  $P < 0.001$ . Error bars = SEM;  $n = 10-25$ ).



951 (B,C) GRK-2 acts in head acetylcholine neurons to positively regulate G<sub>q</sub> signaling. A *grk-2(gk268)* mutant  
952 suppresses the loopy posture and hyperactive locomotion of the activated G<sub>q</sub> mutant *egl-30(tg26)* (Gq\*<sup>\*</sup>).  
953 Expression of the *grk-2* cDNA under a head acetylcholine neuron promoter (*Punc-17H*, transgene *yakEx51*)  
954 reverses the *grk-2* suppression of the loopy posture (B) and hyperactive locomotion (C) of activated G<sub>q</sub>.  
955 (\*\*\*, P<0.001. Error bars = SEM; n = 10).

956 (D) *grk-2* is expressed in head acetylcholine neurons. Representative images of a Z-stack projection of the  
957 area around the nerve ring in the head of an animal coexpressing tagRFP fused to the GRK-2 ORF driven by  
958 the *grk-2* promoter (*grk-2::tagRFP*, integration *yakIs19*) and GFP under a head acetylcholine neuron  
959 promoter (*Punc-17H::eGFP*, transgene *yakEx94*). Anterior to the left. Because *Punc-17H::GFP* is highly  
960 expressed and diffuse throughout the cell but *grk-2::tagRFP* is dimmer and localized only in the cytoplasm,  
961 their coexpression is hard to see in the merged image. For this reason, we have circled the cells where  
962 there is coexpression. Scale bar: 10 μm.

963

964 **Fig 4. Mutations in *dop-3* and *cat-2* suppress *grk-2*.**

965 (A) Mutations in *dop-3* and *cat-2* suppress the slow locomotion of *grk-2* mutants. The *grk-2(gk268)* mutant  
966 has a slow locomotion phenotype. The *dop-3(vs106)* mutation fully suppresses and the *cat-2(e1112)*  
967 mutation partially suppresses the slow locomotion of the *grk-2(gk268)* mutant (\*\*\*, P<0.001. Error bars =  
968 SEM; n = 32-72).

969 (B,C) A *dop-3* mutation reverses the *grk-2* mutant suppression of activated G<sub>q</sub>. The *grk-2(gk268)* mutation  
970 suppresses the loopy posture and hyperactive locomotion of the activated G<sub>q</sub> mutant *egl-30(tg26)* (Gq\*<sup>\*</sup>).  
971 The *dop-3(vs106)* mutation reverses the *grk-2* suppression of the loopy posture (B) and hyperactive  
972 locomotion (C) of Gq\*<sup>\*</sup>. (\*\*\*, P<0.001. Error bars = SEM; n = 15-20).

973 (D,E) *dop-3* and *cat-2* mutations reverse the *grk-2* mutant suppression of the loopy posture of activated  
974 G<sub>q</sub>. The *grk-2(gk268)* mutation suppresses the loopy posture of the activated G<sub>q</sub> mutant *egl-30(tg26)*

975 (Gq\*).The *dop-3(vs106)* and *cat-2(e1112)* mutations reverse the *grk-2* suppression of the loopy posture of  
976 Gq\*. (\*\*\*, P<0.001. ns, P>0.05. Error bars = SEM; n = 5).

977 (F) *grk-2* mutants are hypersensitive to dopamine in a *dop-3*-dependent manner. Shown is the percentage  
978 of wild type, *dop-3(vs106)*, *grk-2(gk268)*, or *grk-2(gk268); dop-3(vs106)* animals that moved ten body  
979 bends after a 20 min exposure to the indicated concentrations of dopamine. Every data point represents  
980 the mean +/- SEM of three trials (15-20 animals per experiment and strain).

981

982 **Fig 5. A *grk-2* mutation partially suppresses activated Rho but does not suppress activated NCA-1.**

983 (A,B) A *grk-2* mutation partially suppresses activated Rho. Animals expressing activated RHO-1 [RHO-  
984 1[G14V]] under an acetylcholine promoter (Rho\*, transgene *nzIs29*) have slow locomotion and loopy  
985 posture. The *grk-2(gk268)* mutation partially suppresses both the loopy posture (A) and slow locomotion  
986 (B) of the Rho\* animals. (\*\*\*, P<0.001. Error bars = SEM; n = 10).

987 (C,D) A *grk-2* mutation does not suppress activated NCA-1. The activated NCA-1 mutant (Nca\*, *nca-*  
988 *1(ox352)*) has slow locomotion and loopy posture. The *grk-2(gk268)* mutation does not suppress the loopy  
989 posture (C) or the slow locomotion (D) of Nca\*. To measure the locomotion of the slow moving Nca\*  
990 animals, we used a radial locomotion assay in which we placed animals in the center of a 10 cm plate and  
991 measured how far the animals had moved in one hour. (ns, P>0.05. Error bars = SEM; n = 10).

992

993 **Fig 6. GRK-2 is a positive modulator of NCA-1 and NCA-2 channel activity.**

994 (A) A *grk-2* mutation enhances the weak forward fainting phenotype of an *nlf-1* mutant. Representative  
995 images of wild-type, *nlf-1(tm3631)*, and *grk-2(gk268); nlf-1(tm3631)* mutant animals. The asterisk shows  
996 the anterior part of the worm that becomes straight when an animal faints.

997 (B) A *grk-2* mutation enhances the weak forward fainting phenotype of an *nlf-1* mutant. The *nlf-1(tm3631)*  
998 mutant is a weak fainter. The *grk-2(gk268)* mutation enhances the *nlf-1* mutant so that the double is a

999 strong fainter. (\*\*\*,  $P < 0.001$ . Error bars = SEM;  $n = 10-20$ ). The number shown is the number of body  
1000 bends before the animal faints. If the animal made ten body bends without fainting, the assay was stopped  
1001 and we recorded ten as the number (see Methods).

1002 (C) The *grk-2(gk268)* mutation enhances the *unc-73(ox317)* mutant so that the double mutant is a strong  
1003 fainter. The *grk-2(gk268)* mutation has no effect on an *egl-8(sa47)* mutant. (\*\*\*,  $P < 0.001$ . Error bars =  
1004 SEM;  $n = 15$ ).

1005 (D) The *egl-10(md176)* mutation enhances the *nlf-1(tm3631)* mutant so that the double mutant is a strong  
1006 fainter. (\*\*\*,  $P < 0.001$ . Error bars = SEM;  $n = 25$ ).

1007 (E) Expression of activated  $G_o$  in head acetylcholine neurons inhibits locomotion. Animals expressing an  
1008 activated  $G_o$  mutant (GOA-1[Q205L]) under a head acetylcholine neuron promoter (*Punc-17H::GOA-1\**,  
1009 transgene *yakEx103*) move more slowly than wild type animals. (\*\*\*,  $P < 0.001$ . Error bars = SEM;  $n = 17$ ).

1010 (F) Expression of activated  $G_o$  in head acetylcholine neurons enhances the weak forward fainting  
1011 phenotype of an *nlf-1* mutant. The *nlf-1(tm3631)* mutant is a weak fainter in forward movement. The *nlf-*  
1012 *1(tm3631)* mutant expressing an activated  $G_o$  mutant (GOA-1[Q205L]) under a head acetylcholine neuron  
1013 promoter (*Punc-17H::GOA-1\**, transgene *yakEx103*) is a stronger fainter than the *nlf-1(tm3631)* mutant.  
1014 (\*\*\*,  $P < 0.001$ . Error bars = SEM;  $n = 54$ ).

1015

### 1016 **Fig 7. Dopamine negatively modulates NCA-1 and NCA-2 channel activity.**

1017 (A) The *cat-2(e1112)* mutation suppresses the weak forward fainting phenotype of the *nlf-1(tm3631)*  
1018 mutant. (\*\*\*,  $P < 0.001$ . Error bars = SEM;  $n = 40$ ).

1019 (B) The *dop-3(vs106)* mutation suppresses the weak forward fainting phenotype of the *nlf-1(tm3631)*  
1020 mutant. (\*\*\*,  $P < 0.001$ . Error bars = SEM;  $n = 40$ ).

1021 (C) The *dop-3(vs106)* mutation partially suppresses the strong forward fainting phenotype of the *grk-*  
1022 *2(gk268); nlf-1(tm3631)* double mutant. (\*\*\*,  $P < 0.001$ . Error bars = SEM;  $n = 40$ ).

1023 (D) Exogenous dopamine causes the *grk-2(gk268)* mutant to faint in a *dop-3* dependent manner. Shown is  
1024 the percentage of animals that faint within a period of ten body bends when moving backwards after  
1025 exposure to 2 mM dopamine for 20 min. (\*\*\*,  $P < 0.001$ . Error bars = SEM;  $n = 2-5$  trials of 14-25 animals  
1026 each).

1027

1028 **Fig 8. GRK-2 is expressed and acts in command interneurons to regulate locomotion.**

1029 (A) *grk-2* is expressed in command interneurons. Representative images of a Z-stack projection of the area  
1030 around the nerve ring (head) of an animal coexpressing tagRFP fused to the GRK-2 cDNA driven by the *grk-*  
1031 *2* promoter (*grk-2::RFP*, transgene *yakIs19*) and a *cho-1* fosmid YFP reporter (*cho-1<sup>fosmid</sup>::SL2::YFP::H2B*,  
1032 transgene *otIs534*). For the *cho-1* fosmid reporter, an SL2-spliced, nuclear-localized *YFP::H2B* sequence  
1033 was engineered right after the stop codon of the gene [93,110]. As indicated in the figure, *grk-2::RFP* is  
1034 expressed in the AVA, AVB, AVD, and AVE command interneurons; SMD and RMD head motor neurons;  
1035 and in the AIN, AIY, SIA, SIB, and SAA interneurons. Scale bar: 10  $\mu$ m.

1036 (B-D) *grk-2* cDNA expression in (B) SMD/RMD (*Pcho-1*, 3.3 to 2.6 kb upstream of the ATG, transgene  
1037 *yakEx135*), (C) SIA/SIB (*Pceh-24*, transgene *yakEx149*), or (D) AIY (*Pttx-3*, transgene *yakEx138*) neurons  
1038 does not rescue the slow locomotion of *grk-2(gk268)* mutants. (Error bars = SEM;  $n = 15$ ).

1039 (E) *grk-2* cDNA expression in command interneurons (*Psra-11 + Pnmr-1*, transgene *yakEx141*) is sufficient  
1040 to rescue the slow locomotion of *grk-2(gk268)* mutants. (\*\*\*,  $P < 0.001$ . Error bars = SEM;  $n = 25$ ).

1041 (F) *grk-2* cDNA expression in command interneurons (*Psra-11 + Pnmr-1*, transgene *yakEx141*) is sufficient  
1042 to rescue the strong fainting phenotype of *grk-2(gk268); nlf-1(tm3631)* mutants. (\*\*\*,  $P < 0.001$ . Error bars  
1043 = SEM;  $n = 40$ ).

1044 (G) *dop-3* cDNA expression in command interneurons (*Psra-11 + Pnmr-1*, transgene *yakEx148*) is sufficient  
1045 to reverse the *dop-3(vs106)* mutant suppression of the slow locomotion of *grk-2(gk268)* mutant animals.  
1046 (\*\*,  $P < 0.01$ . Error bars = SEM;  $n = 23$ ).

1047

1048 **Fig 9. Model for GRK-2 and dopamine action in modulating activity of the NCA channels.**

1049 Schematic representation of the dopamine,  $G_q$  and  $G_o$  signaling pathways [61,82]. Solid arrows indicate  
1050 direct actions or direct physical interactions. Dashed arrows indicate interactions that may be indirect. Our  
1051 results suggest that dopamine decreases activity of the NCA-1 and NCA-2 channels (shown here  
1052 collectively as “NCA”) by binding to DOP-3 and activating  $G_o$  signaling. GRK-2 acts as a kinase for the D2-  
1053 like dopamine receptor DOP-3 to inhibit DOP-3, and thereby inhibit  $G_o$ , activate  $G_q$ , and positively regulate  
1054 NCA-1 and NCA-2 channel activity.

1055 **Supporting information**

1056 **S1 Fig. *grk-2* mutant phenotypes.**

1057 (A) The *grk-2(gk268)* mutant has an egg-laying defect. The graph shows the number of eggs laid by 5  
1058 animals in a 2 h period. (\*\*,  $P < 0.01$ . Error bars = SEM;  $n = 2$  plates of 5 animals each).

1059 (B) The *grk-2(gk268)* mutant animals have short bodies. (\*\*\*,  $P < 0.001$ . Error bars = SEM;  $n = 10$ ).

1060 (C) A *dop-3* mutation does not suppress the restricted exploration behavior of *grk-2* mutants. Shown are  
1061 images of tracks of five wild-type, *grk-2(gk268)*, and *grk-2(gk268); dop-3(vs106)* mutant animals that were  
1062 allowed to explore a bacterial lawn for 2 hours at room temperature.

1063

1064 **S2 Fig. *grk-2* mutants have swimming defects.**

1065 Shown are plots of bending angle (midpoint) versus time for representative individual animals. The two  
1066 plots of *grk-2(gk268)* mutant animals show individuals with strong and weak swimming defects. The *dop-*  
1067 *3(vs106)* mutation suppresses the swimming defects of the *grk-2(gk268)* mutant.

1068

1069 **S3 Fig. Arrestin mutants do not have locomotion defects and do not suppress Gq\*.**

1070 (A) The *arr-1(ok401)* mutant has no locomotion defect. (ns,  $P > 0.05$ . Error bars = SEM;  $n = 10$ ).

1071 (B) The *arr-1(ok401)* mutation does not suppress the loopy posture of the *egl-30(tg26)* mutant.

1072 (C) The *arr-1(ok401)* mutation, in contrast to a *grk-2(gk268)* mutation, does not cause a fainting phenotype  
1073 in an *nca-1(gk9)* mutant background. Shown is the percentage of animals that faint when moving  
1074 backwards. The wild type, *nca-1*, *grk-2*, and *grk-2; nca-1* data are the same data shown in Figure S6F. The  
1075 graph shows the combined data from two independent experiments, each with  $n = 20-40$ . (\*\*,  $P < 0.01$ ;  
1076 \*\*\*,  $P < 0.001$ ; ns,  $P > 0.05$ ).

1077

1078 **S4 Fig. A *grk-2* mutation suppresses the hyperactive locomotion of *dgk-1*, but not *goa-1* or *eat-16***  
1079 **mutants.**

1080 (A) The *grk-2(gk268)* mutation does not suppress the hyperactive locomotion of the *eat-16(tm775)* and  
1081 *goa-1(sa734)* mutants. (ns, P>0.05. Error bars = SEM; n = 10-20).

1082 (B) The *grk-2(gk268)* mutation suppresses the hyperactive locomotion phenotype of the *dgk-1(sy428)*  
1083 mutant. (\*\*\*, P<0.001. ns, P>0.05. Error bars = SEM; n = 10-20).

1084 (C-D) The *grk-2(gk268)* mutation does not suppress the loopy posture of the *eat-16(tm775)* and *goa-*  
1085 *1(sa734)* mutants. (ns, P>0.05. Error bars = SEM; n = 5).

1086 (E) The kinase dead GRK-2 does not reverse the *grk-2* suppression of the *dgk-1* hyperactive locomotion  
1087 phenotype. Expression of the kinase dead GRK-2[K220R] mutant under its own promoter (transgene  
1088 *yakEx48*) does not reverse the *grk-2* suppression of *dgk-1* hyperactivity. (ns, P>0.05. Error bars = SEM; n =  
1089 10-20).

1090 (F) Expression of the *grk-2* cDNA under a head acetylcholine neuron promoter (transgene *yakEx51*)  
1091 reverses the *grk-2* suppression of the hyperactive locomotion of the *dgk-1(sy428)* mutant. (\*\*\*, P<0.001.  
1092 Error bars = SEM; n = 10-20).

1093

1094 **S5 Fig. A *cat-2* mutation reverses the *grk-2* mutant suppression of activated G<sub>q</sub>. The *grk-2(gk268)***  
1095 **mutation suppresses the loopy posture and hyperactive locomotion of the activated G<sub>q</sub> mutant *egl-***  
1096 ***30(tg26)* (Gq\*).** The *cat-2(e1112)* mutation reverses the *grk-2* suppression of the loopy posture (A) and  
1097 hyperactive locomotion (B) of Gq\*. (\*\*\*, P<0.001. Error bars = SEM; n = 15-20).

1098

1099 **S6 Fig. *dop-3* acts in head acetylcholine neurons to regulate *grk-2* dependent locomotion.**

1100 (A) The *dop-3* suppression of *grk-2* is reversed by *dop-3* expression in head acetylcholine neurons. The  
1101 *dop-3* cDNA was expressed in the *grk-2(gk268); dop-3(vs106)* double mutant under a pan-neuronal

l102 promoter (*Prab-3*, transgene *yakEx112*), acetylcholine neuron promoter (*Punc-17*, transgene *yakEx111*),  
l103 head acetylcholine neuron promoter (*Punc-17H*, transgene *yakEx110*) and ventral cord acetylcholine  
l104 motor neuron promoter (*Pacr-2*, transgene *yakEx109*). Expression of *dop-3* driven by the pan-neuronal,  
l105 acetylcholine neuron, and head acetylcholine neuron promoters reversed the *dop-3(vs106)* mutant  
l106 suppression of the slow locomotion of *grk-2(gk268)* mutant animals. (\*, P<0.05; \*\*, P<0.01; \*\*\*, P<0.001;  
l107 ns, P>0.05. Error bars = SEM; n = 10-33).

l108 (B) A *dop-1* mutation does not affect the *dop-3* suppression of the *grk-2* slow locomotion phenotype. *grk-*  
l109 *2; dop-3* mutants move more rapidly than the *grk-2* mutant. The *dop-1(vs100)* mutation does not affect  
l110 *grk-2(gk268); dop-3(vs106)* locomotion. (ns, P>0.05. Error bars = SEM; n = 23-34).

l111 (C-E) Expression of *dop-3* in ventral cord motor neurons is not sufficient to reverse the hyperactive  
l112 locomotion and loopy posture of *egl-30(tg26); grk-2; dop-3* mutant animals. (C) Expression of *dop-3* driven  
l113 by the ventral cord neuron promoter (*Pacr-2*, transgene *yakEx109*) does not reduce the hyperactivity of  
l114 *egl-30(tg26); grk-2(gk268); dop-3(vs106)* mutant animals. (\*\*\*, P<0.001; ns, P>0.05. Error bars = SEM; n =  
l115 10). (D-E) Expression of *dop-3* driven by the ventral cord neuron promoter (*Pacr-2*, transgene *yakEx109*)  
l116 does not reverse the loopy waveform of *egl-30(tg26); grk-2(gk268); dop-3(vs106)* mutant animals. (\*\*,  
l117 P<0.01; \*\*\*, P<0.001; ns, P>0.05. Error bars = SEM; n = 10).

l118 (F) A *dop-3* mutation suppresses the fainting phenotype of *grk-2; nca-1* mutants. Shown is the percentage  
l119 of animals that faint when moving backwards. The wild type, *nca-1*, *grk-2*, and *grk-2; nca-1* data are the  
l120 same data shown in Figure S3C. The graph shows the combined data from two independent experiments,  
l121 each with n = 20-40. (\*\*, P<0.01; \*\*\*, P<0.001; ns, P>0.05).

l122

l123 **S7 Fig. *grk-2* does not affect the level of expression or subcellular localization of DOP-3::GFP.**



l124 (A) DOP-3::GFP expression driven by the *grk-2* promoter (transgene *yakEx130*) reverses the *dop-3* mutant  
l125 suppression of the slow locomotion phenotype of *grk-2* mutants. (\*\*,  $P < 0.01$ ; \*\*\*,  $P < 0.001$ . Error bars =  
l126 SEM;  $n = 10$ ).

l127 (B) DOP-3::GFP levels remain unaffected in *grk-2* mutants. Immunoblot of extracts derived from *dop-3* or  
l128 *grk-2; dop-3* animals expressing *Pgrk-2::DOP-3::GFP* and *Pmyo-2::mCherry* from an extrachromosomal  
l129 array (transgene *yakEx130*). The experiment was repeated twice with similar results.

l130 (C,D) DOP-3::GFP subcellular localization and level of expression remain unaffected in *grk-2* mutants. (C)  
l131 Representative images of a Z-stack projection of the area around the nerve ring in the head of *dop-3* or  
l132 *grk-2; dop-3* mutant animals expressing *Pgrk-2::DOP-3::GFP* (transgene *yakEx130*). (D) Quantification of  
l133 the ratio of DOP-3::GFP to mCherry in the region around the nerve ring of *dop-3* or *grk-2; dop-3* animals  
l134 expressing *Pgrk-2::DOP-3::GFP* and *Pmyo-2::mCherry* (transgene *yakEx130*). (ns,  $P > 0.05$ . Error bars = SEM;  
l135  $n = 10$ ).

l136

l137 **S8 Fig. Mutations in *dop-3* and *cat-2* do not suppress the strong fainter phenotype of *unc-80* mutants.**

l138 (A) The *dop-3(vs106)* mutation does not suppress the strong forward fainting phenotype of the *unc-*  
l139 *80(ox330)* mutant. (ns,  $P > 0.05$ . Error bars = SEM;  $n = 20$ ).

l140 (B) The *cat-2(e1112)* mutation does not suppress the strong forward fainting phenotype of the *unc-*  
l141 *80(ox330)* mutant. (ns,  $P > 0.05$ . Error bars = SEM;  $n = 36-38$ ).

l142

l143 **S9 Fig. *grk-2* expression driven by only the *sra-11* or *nmr-1* promoter does not rescue the slow**  
l144 **locomotion of *grk-2* mutants.**

l145 (A), (B) *grk-2* cDNA expression driven by the (A) *sra-11* (*Psra-11*, transgene *yakEx147*) or (B) *nmr-1* (*Pnmr-*  
l146 *1*, transgene *yakEx85*) promoter does not rescue the slow locomotion of the *grk-2(gk268)* mutant. (ns,  
l147  $P > 0.05$ . Error bars = SEM;  $n = 10-20$ ).

1148

1149

1150 **S1 Table. List of strains.**

1151

1152 **S2 Table. List of plasmids.**

1153

**Fig 1**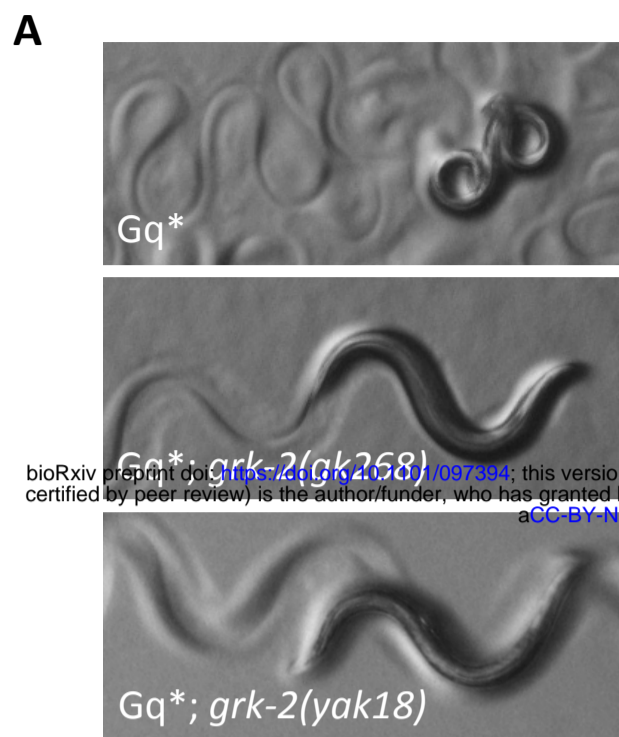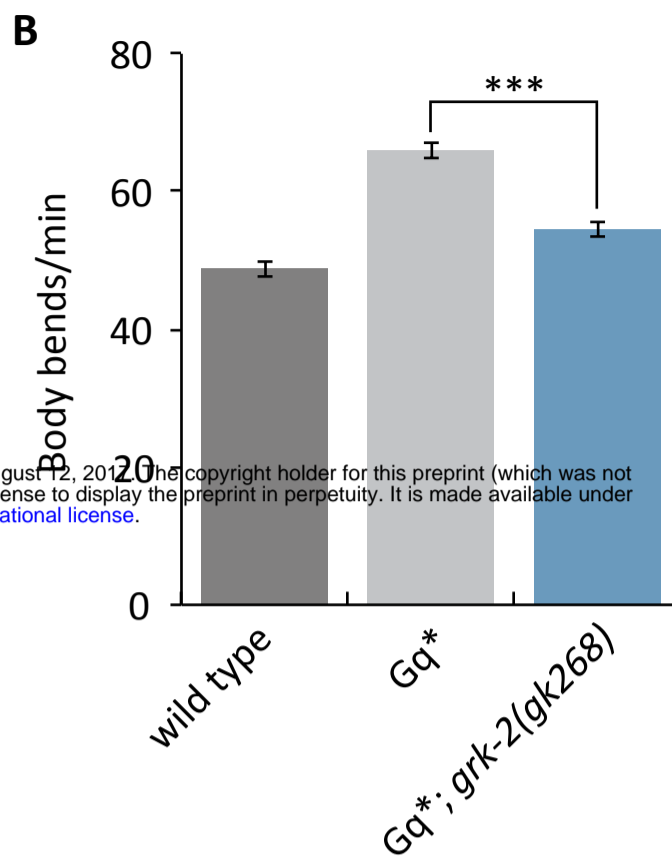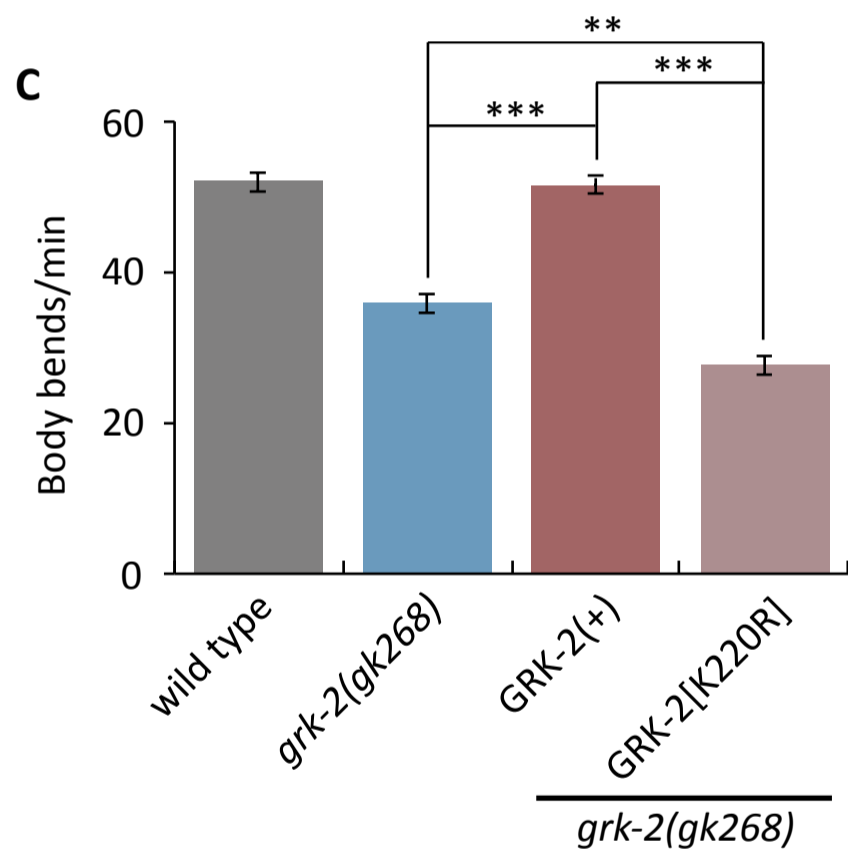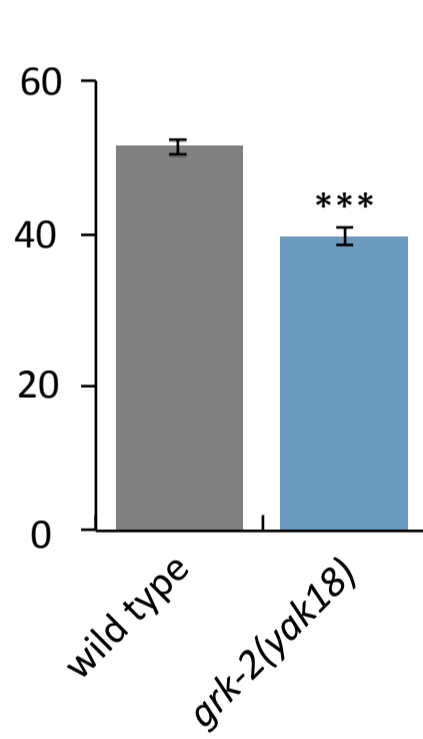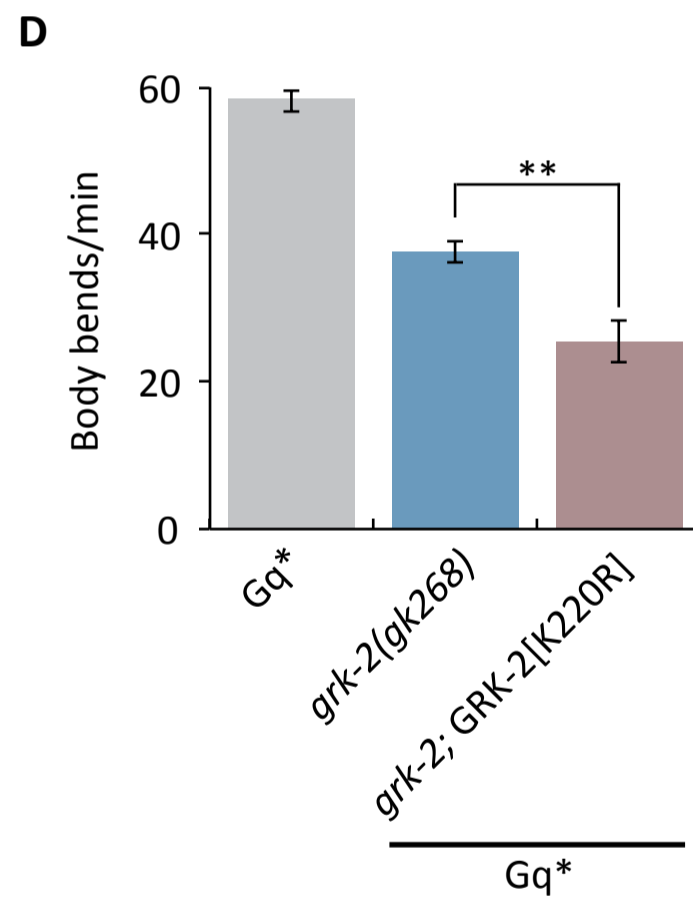

bioRxiv preprint doi: <https://doi.org/10.1101/097394>; this version posted August 12, 2016. The copyright holder for this preprint (which was not certified by peer review) is the author/funder, who has granted bioRxiv a license to display the preprint in perpetuity. It is made available under aCC-BY-NC 4.0 International license.

**Fig 2**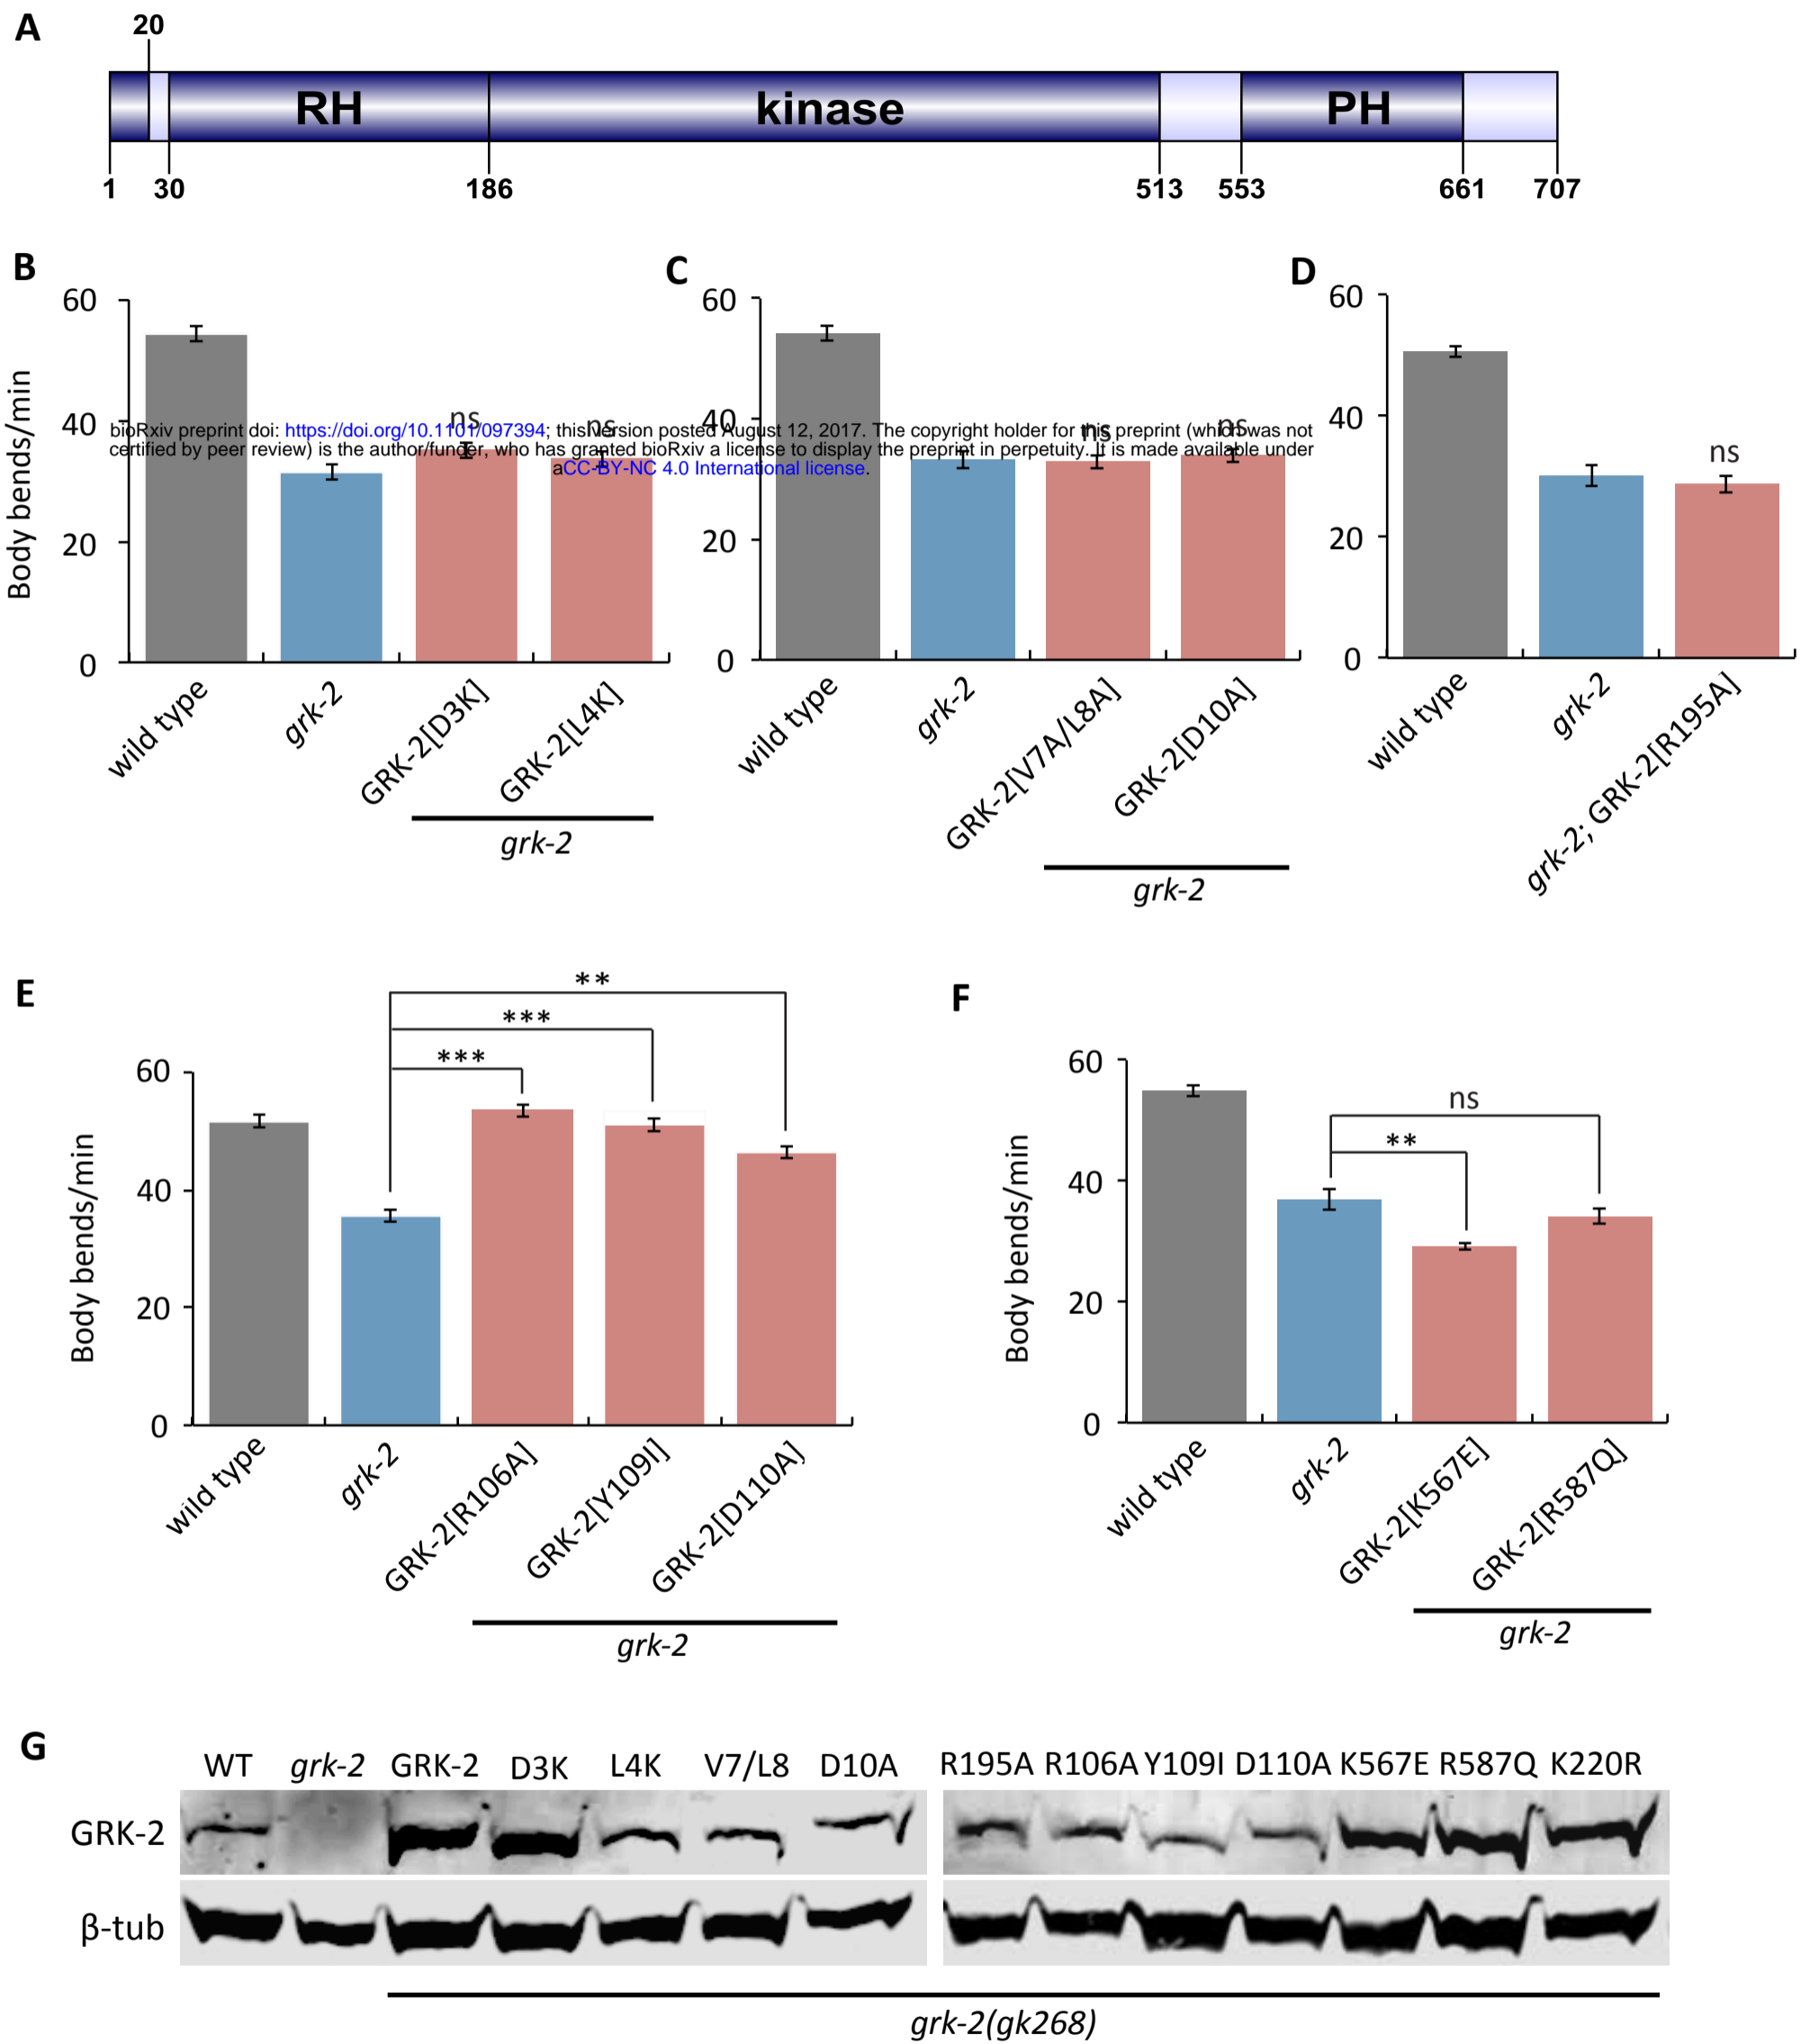

**Fig 3**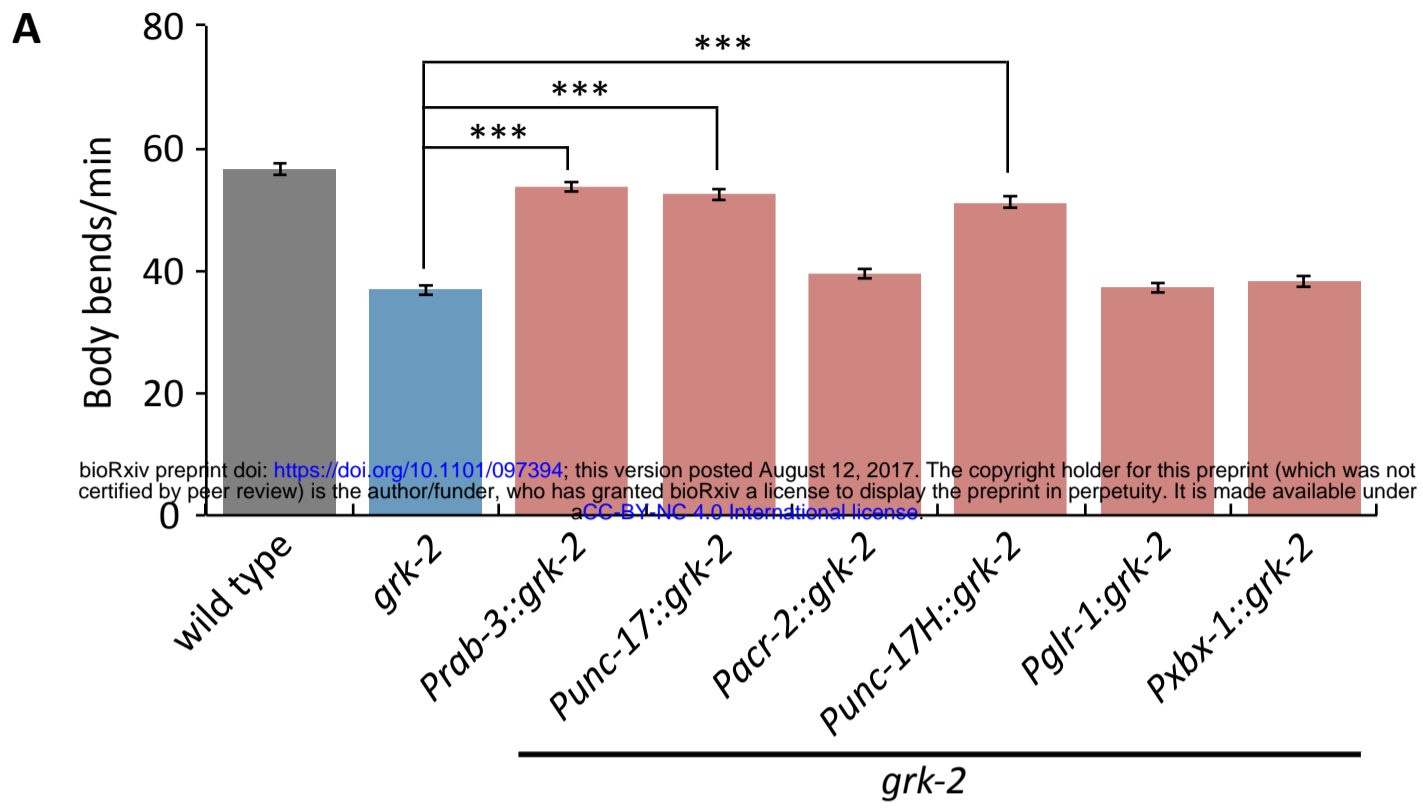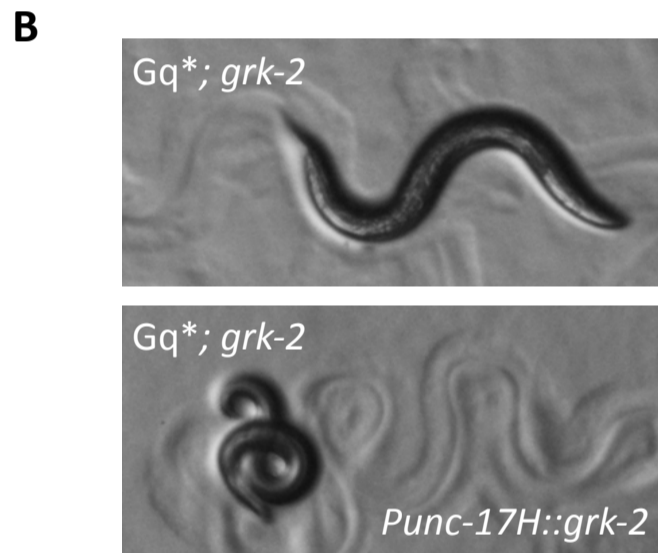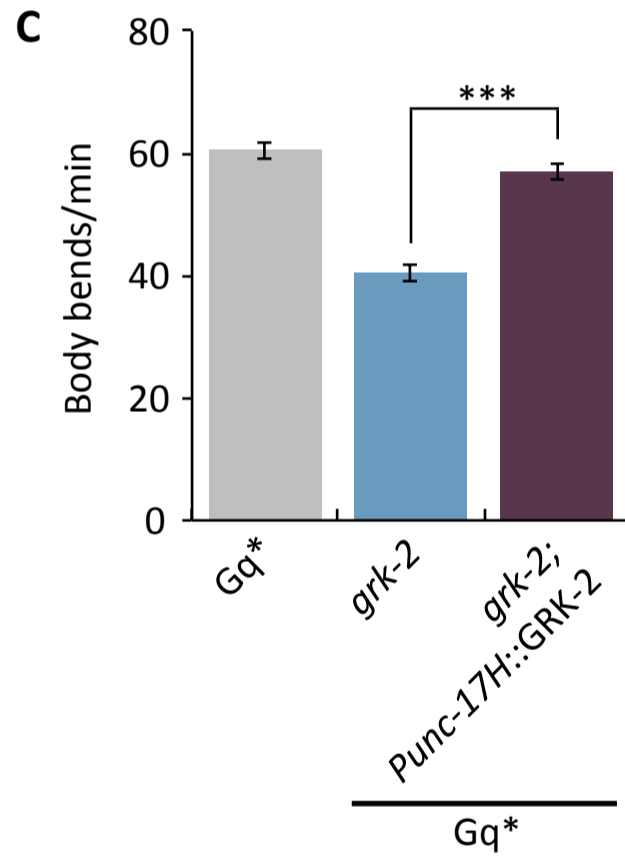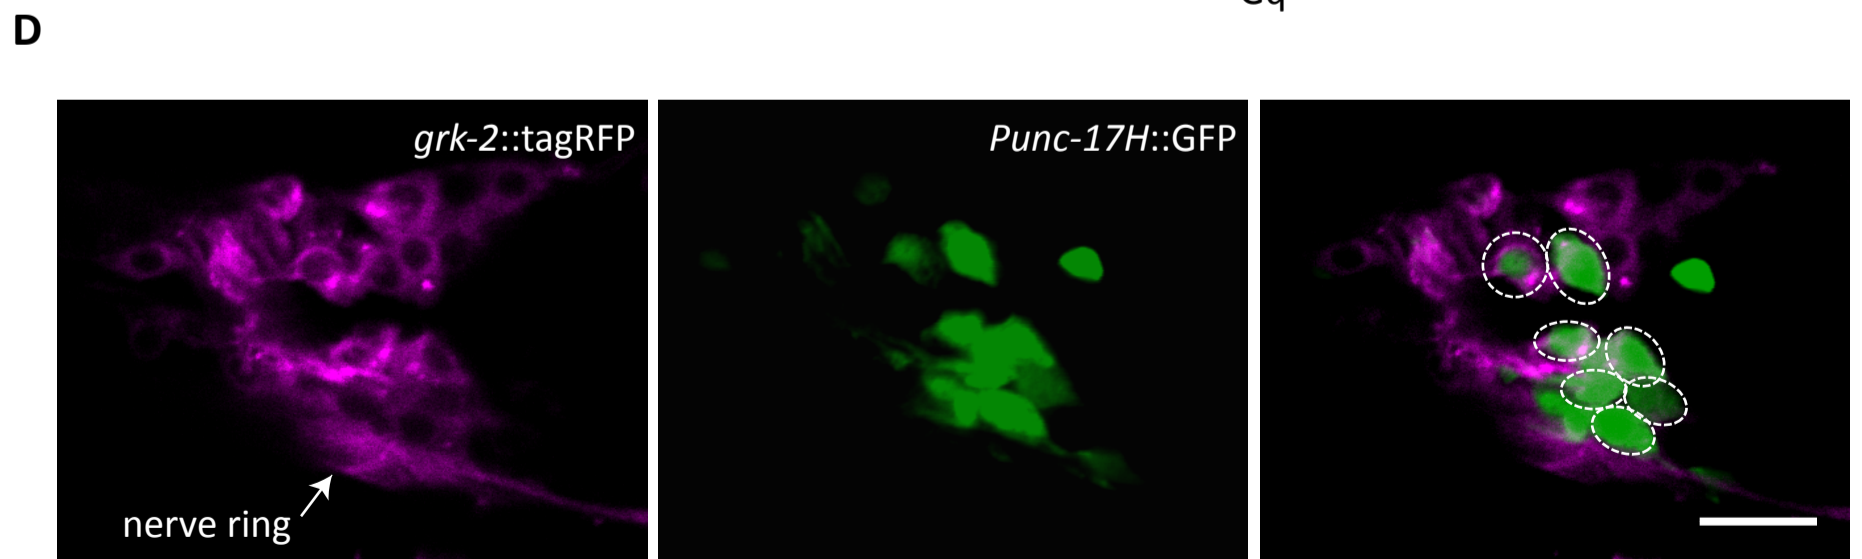

**Fig 4****A**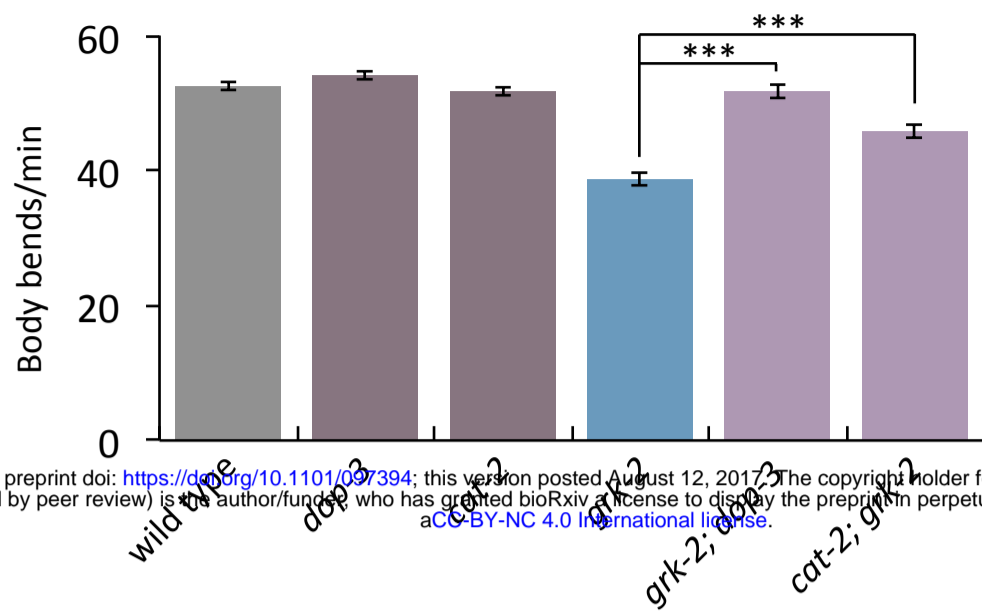

bioRxiv preprint doi: <https://doi.org/10.1101/097394>; this version posted August 12, 2017. The copyright holder for this preprint (which was not certified by peer review) is the author/funder, who has granted bioRxiv a license to display the preprint in perpetuity. It is made available under aCC-BY-NC 4.0 International license.

**B**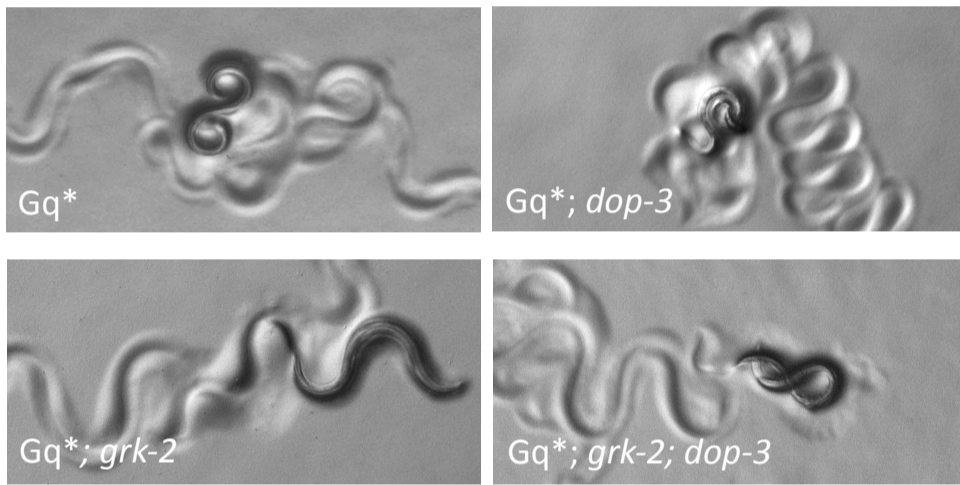**C**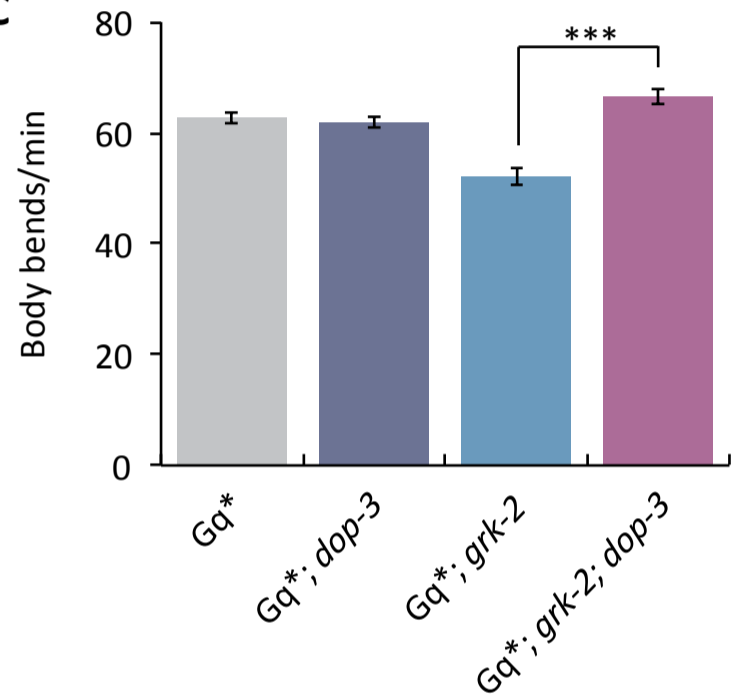**D**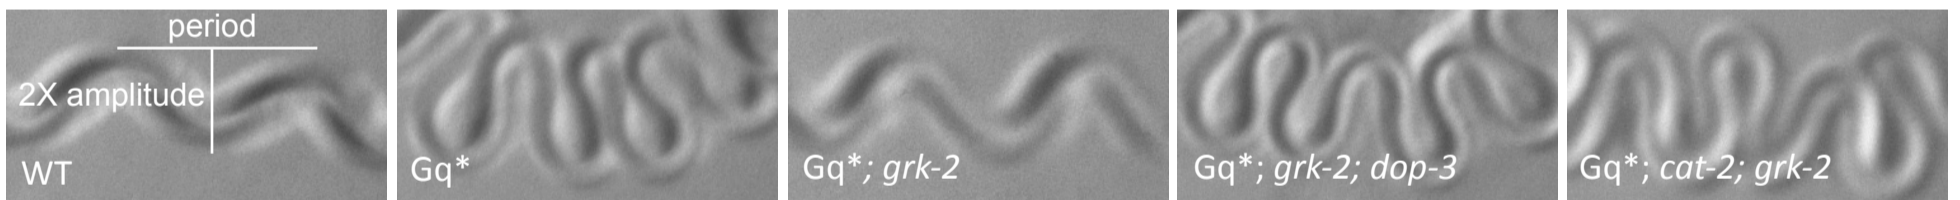**E**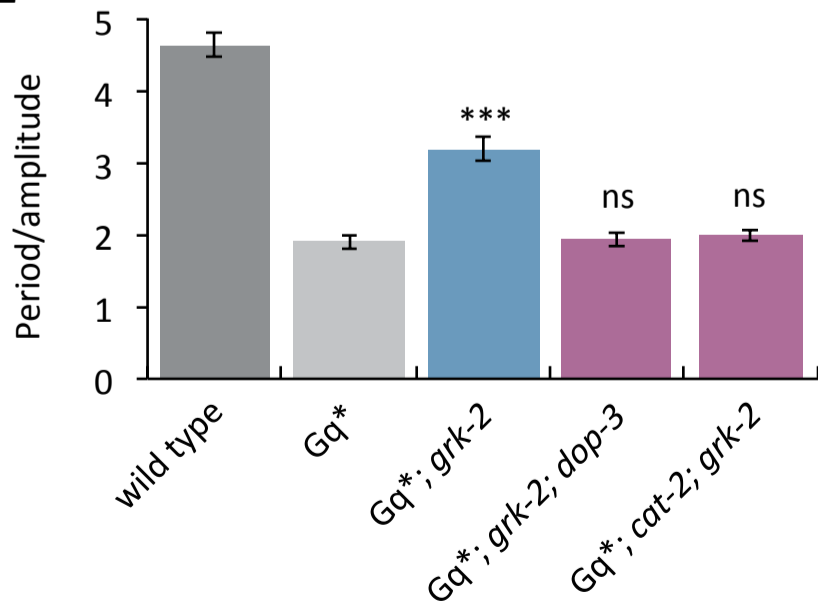**F**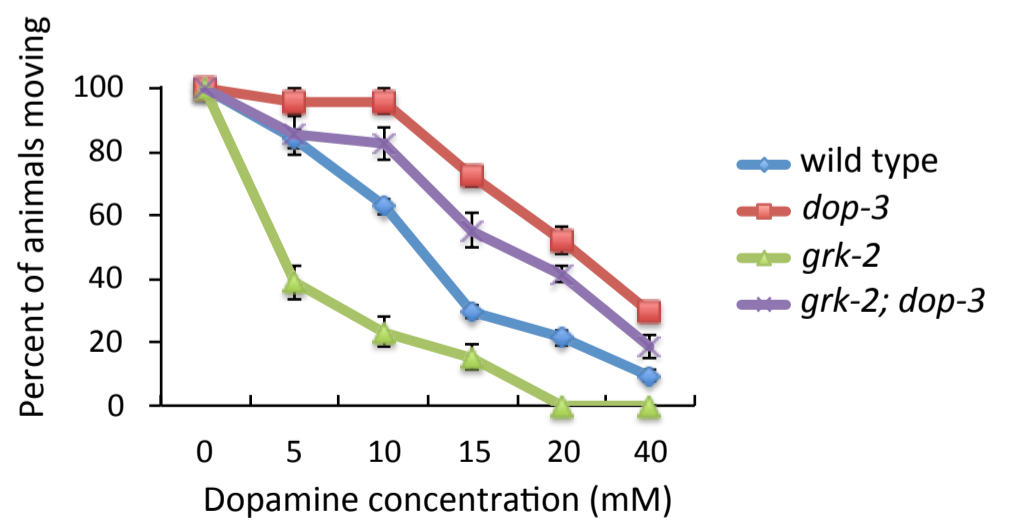

**Fig 5**

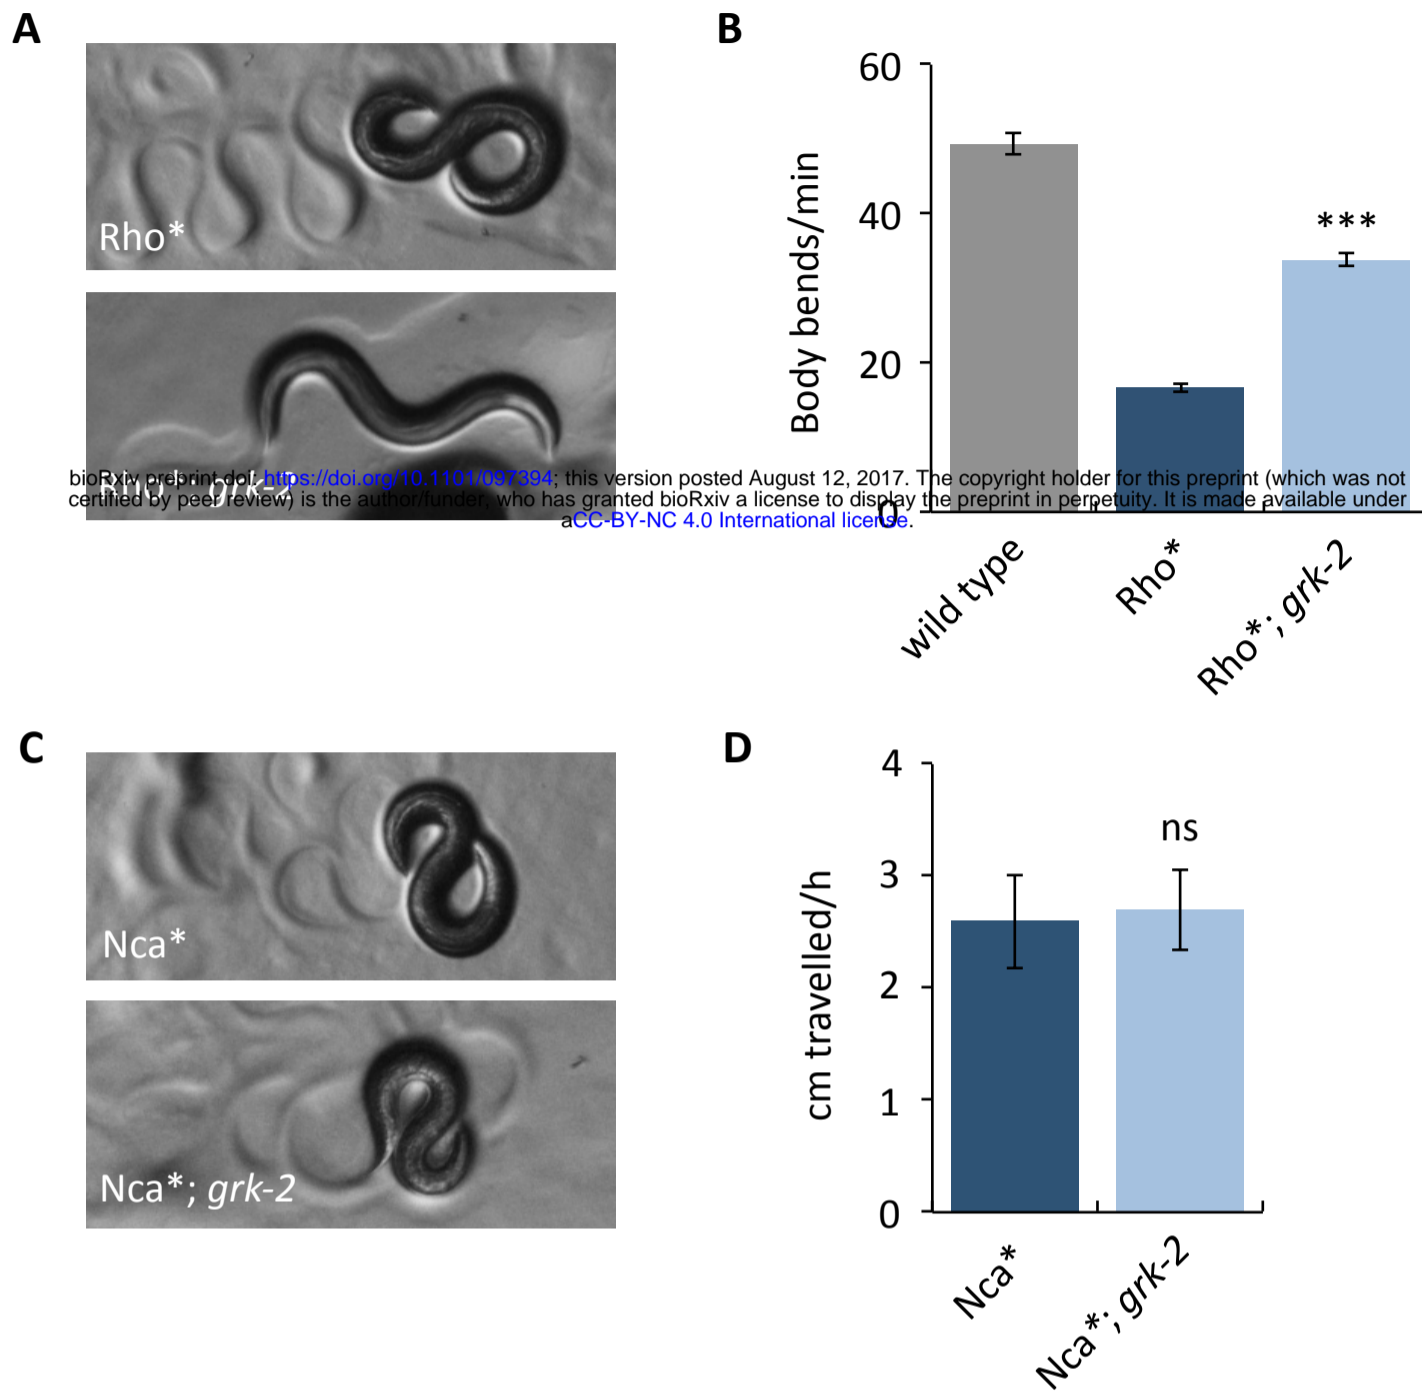



**Fig 6****A**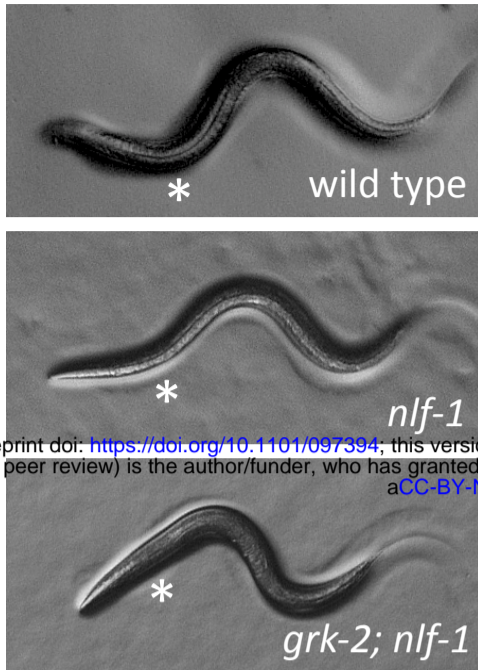

bioRxiv preprint doi: <https://doi.org/10.1101/097394>; this version posted August 12, 2016. The copyright holder for this preprint (which was not certified by peer review) is the author/funder, who has granted bioRxiv a license to display the preprint in perpetuity. It is made available under aCC-BY-NC 4.0 International license.

**B**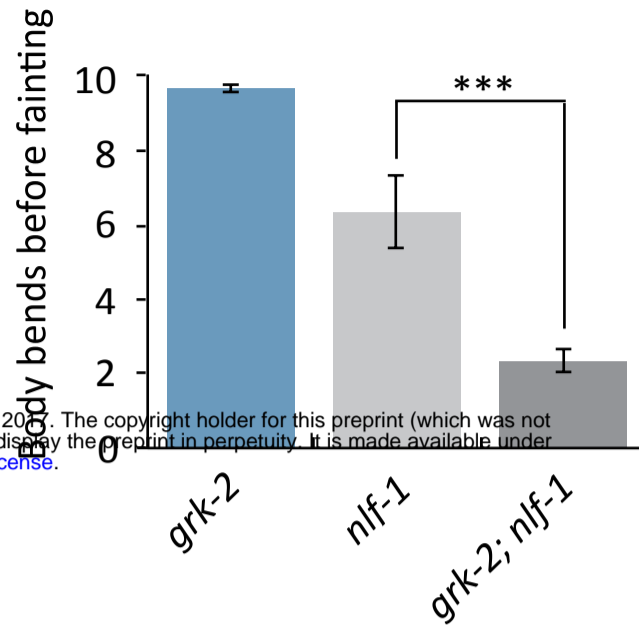**C**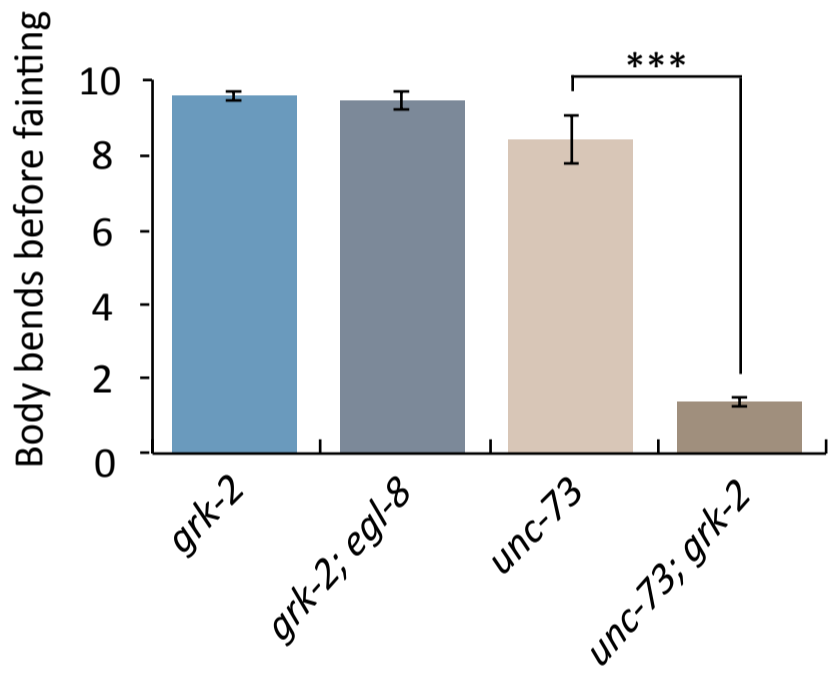**D**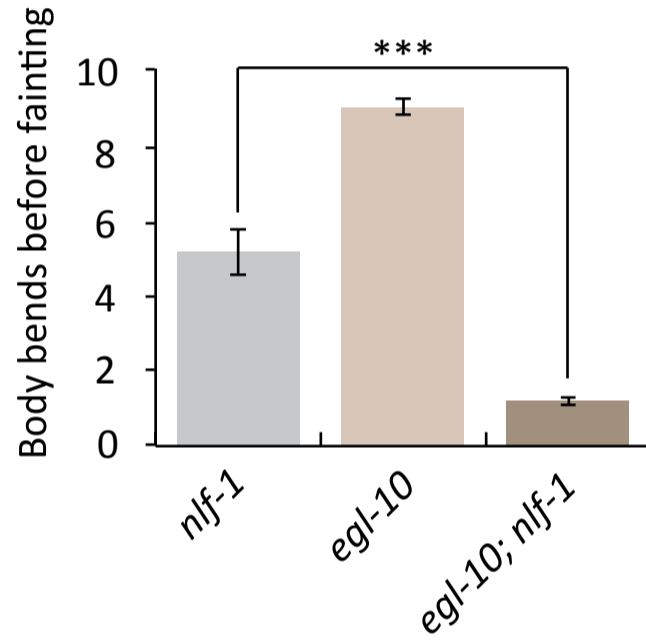**E**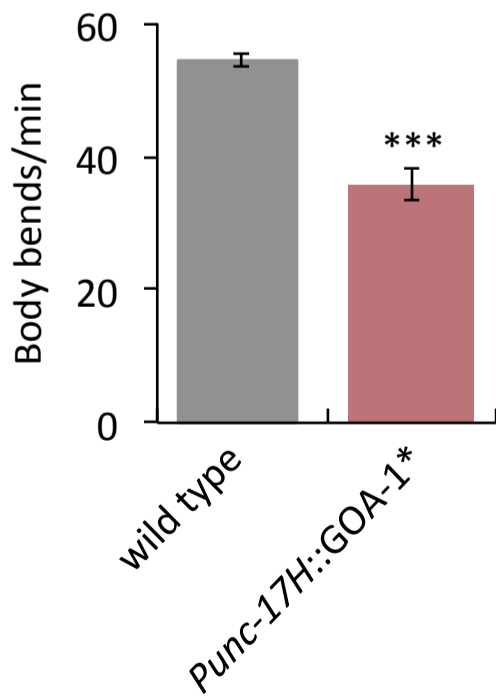**F**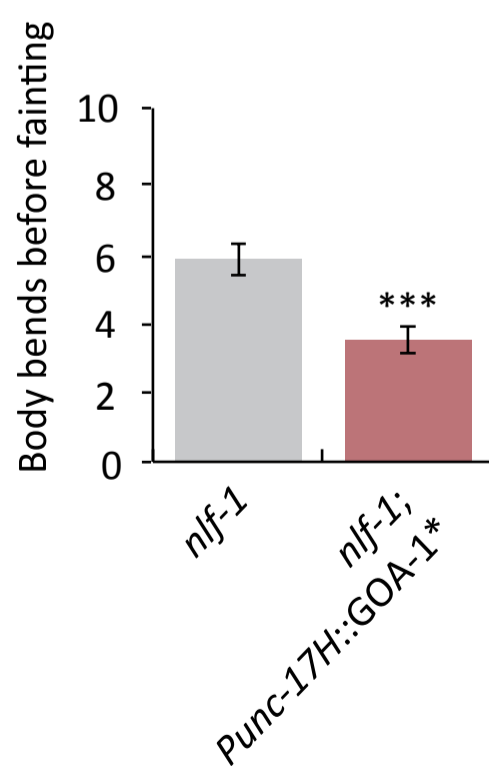



**Fig 7**

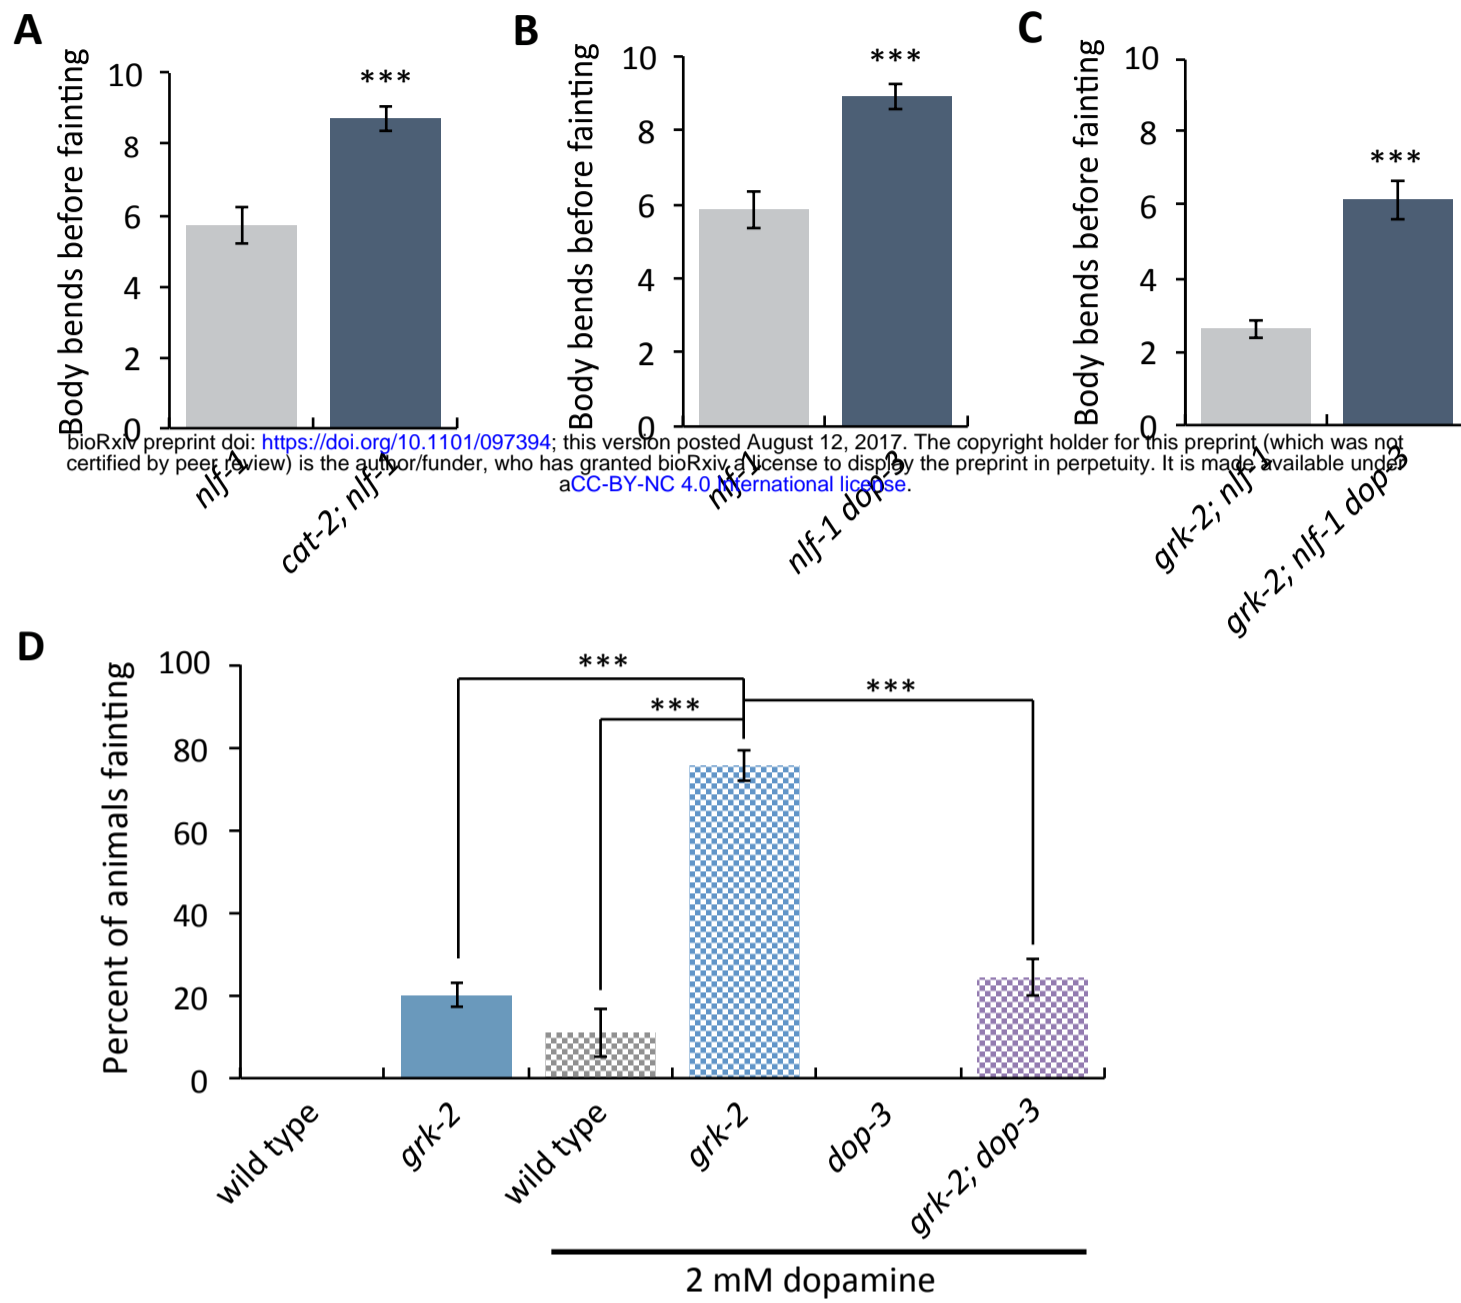

**Fig 8**

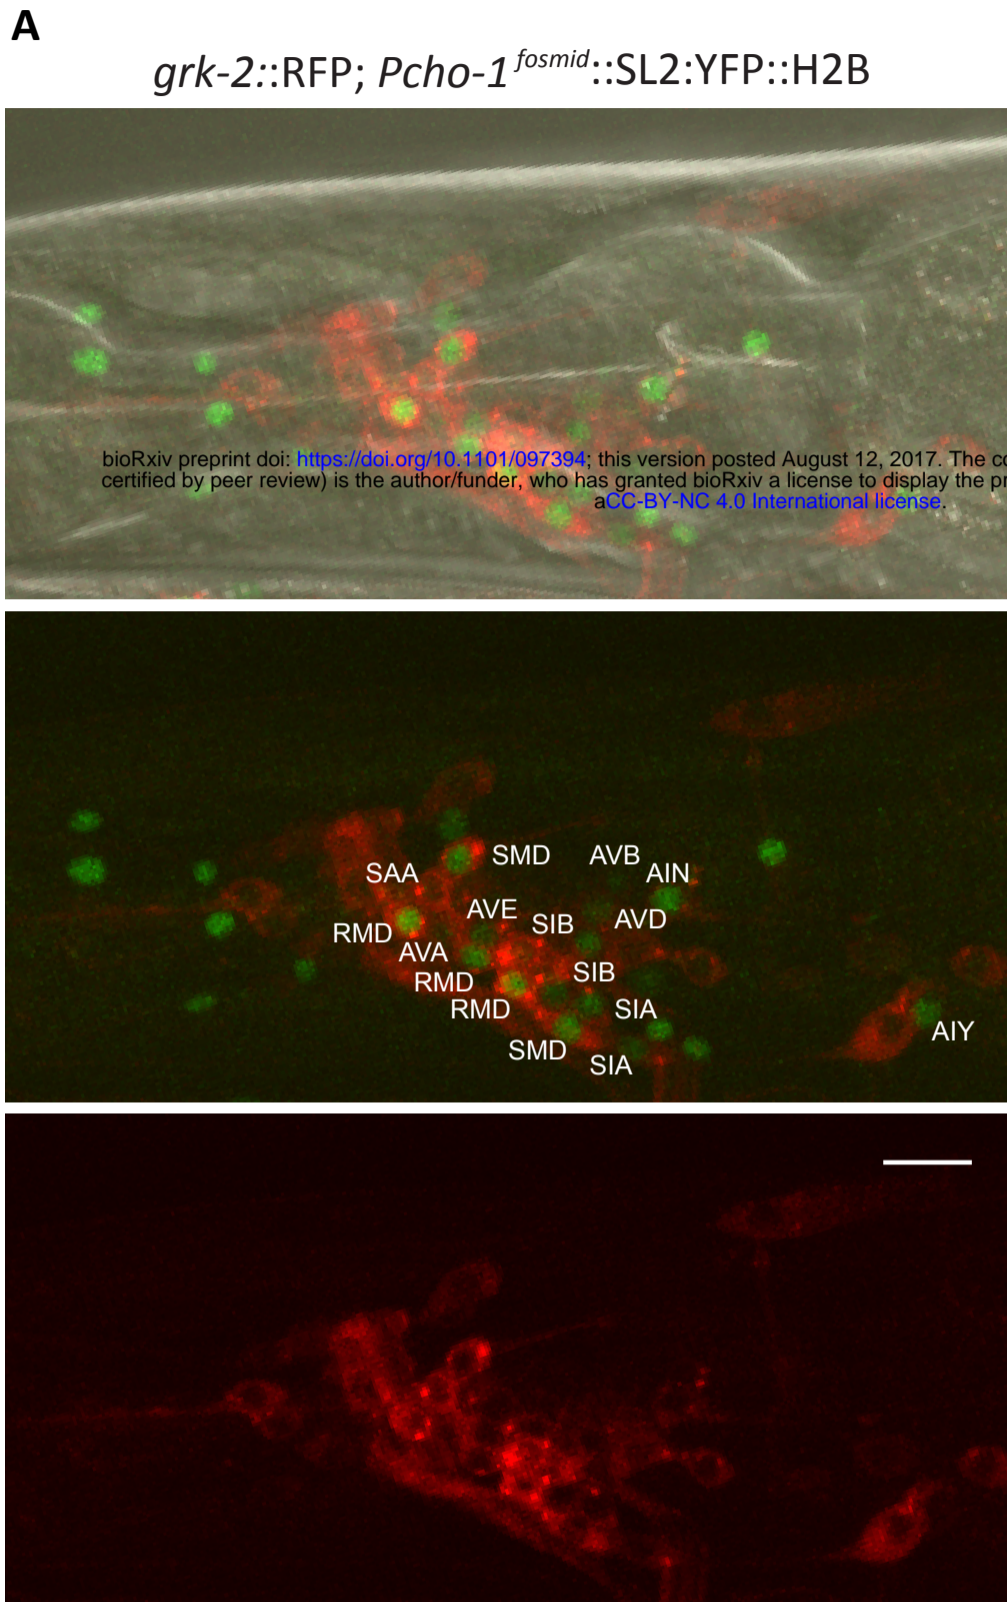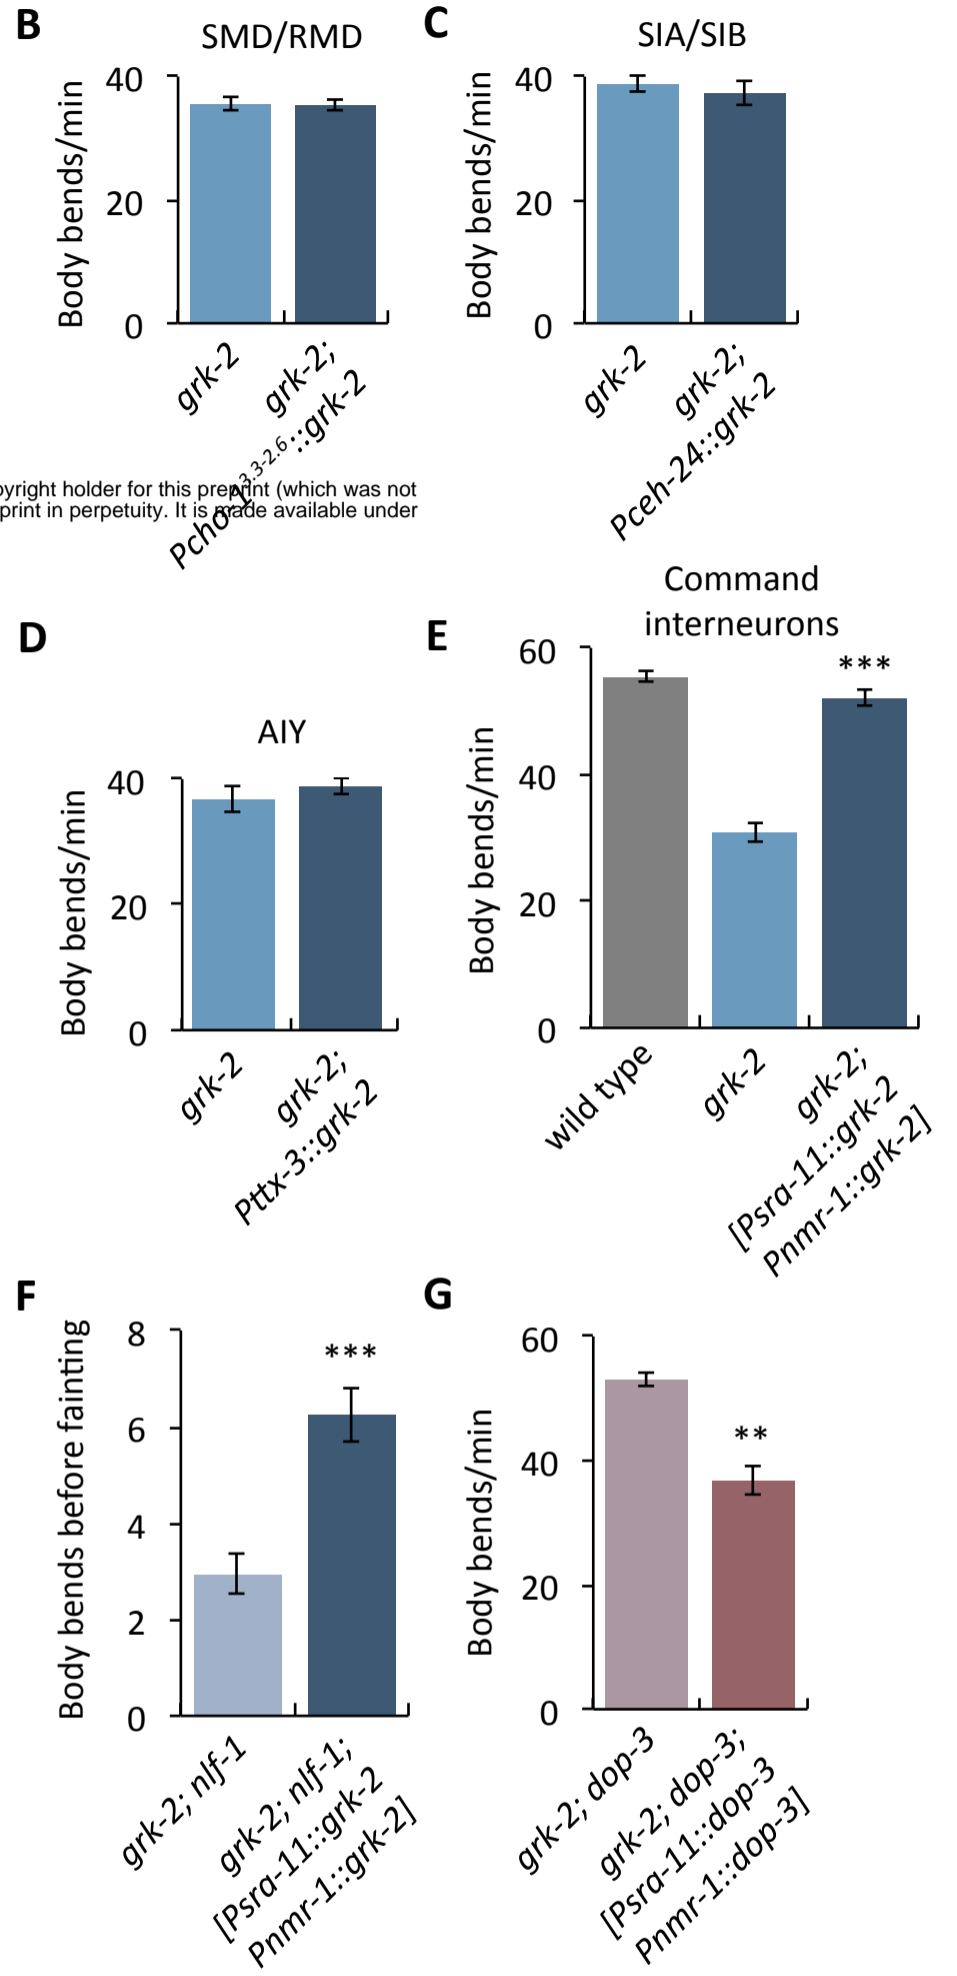

**Fig 9**

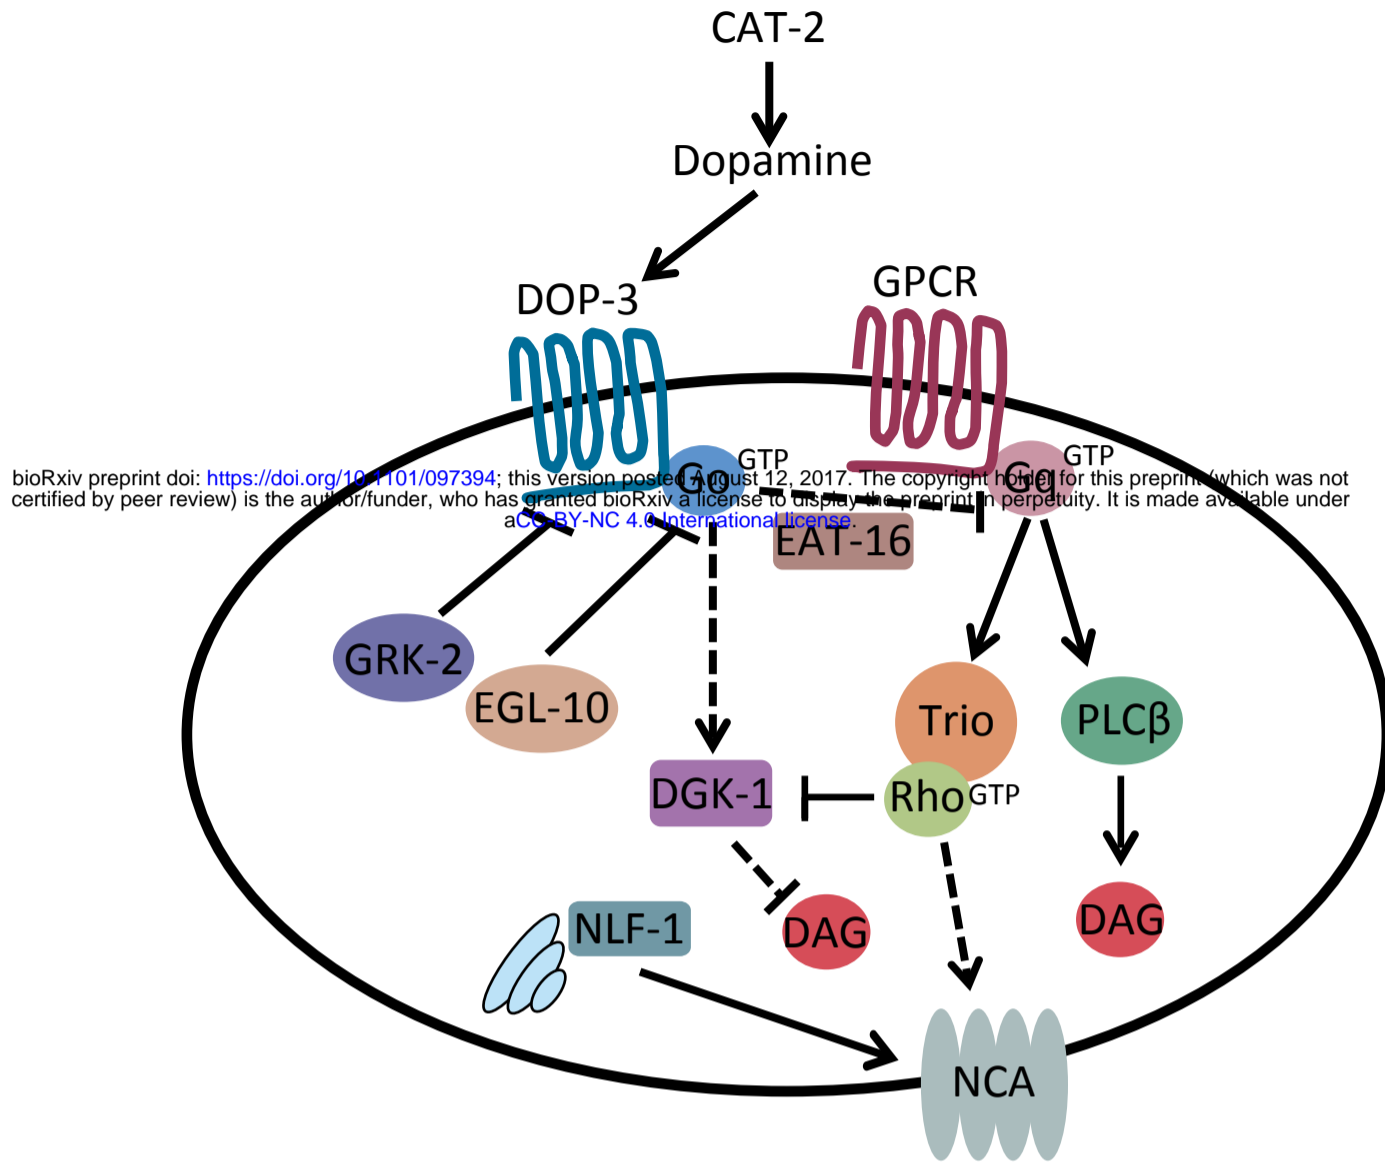

# S1 Fig.

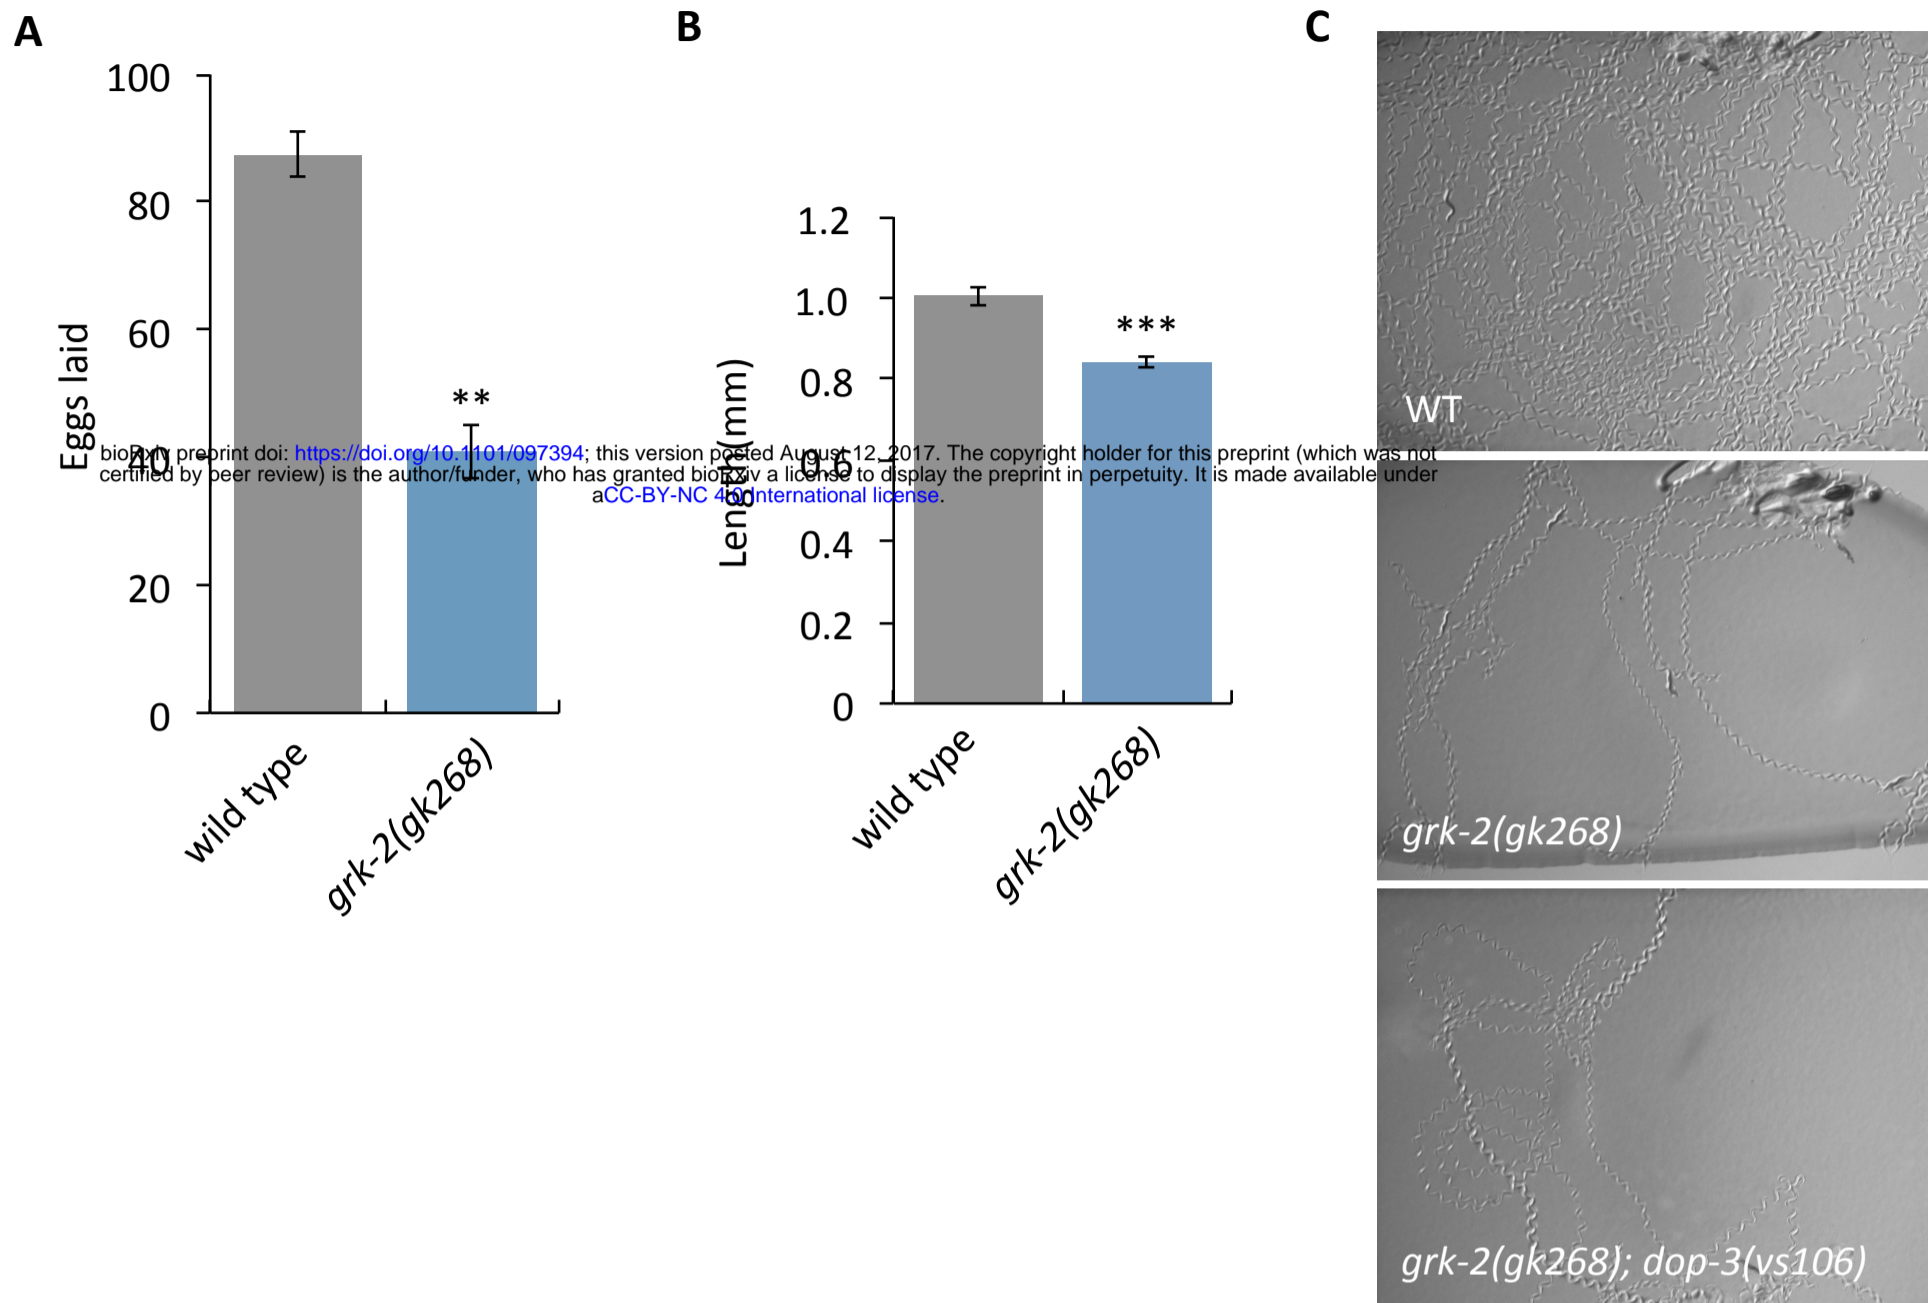

S2 Fig.

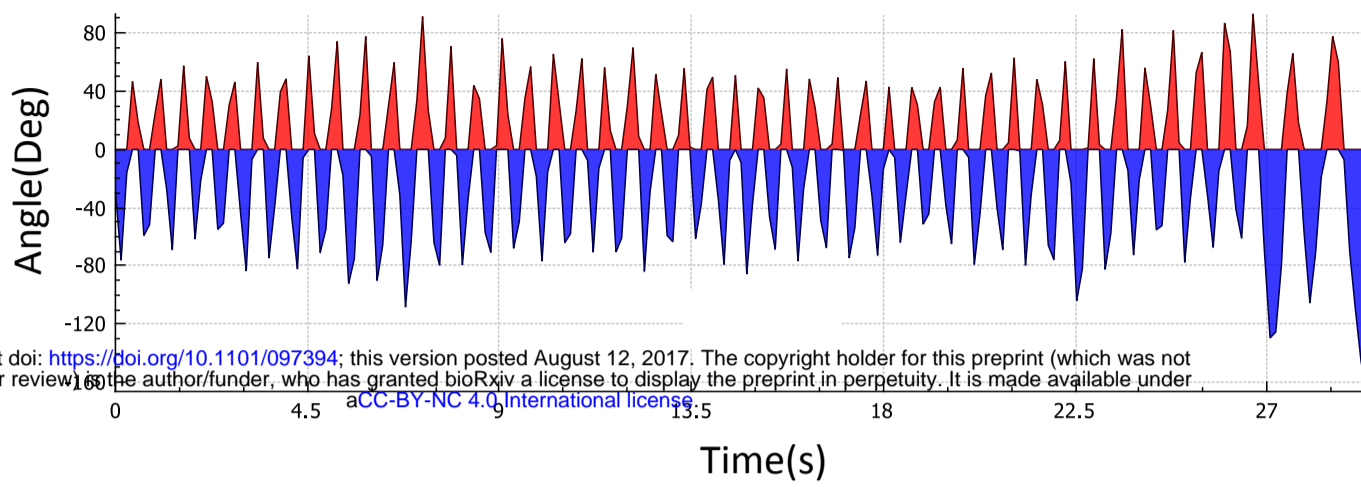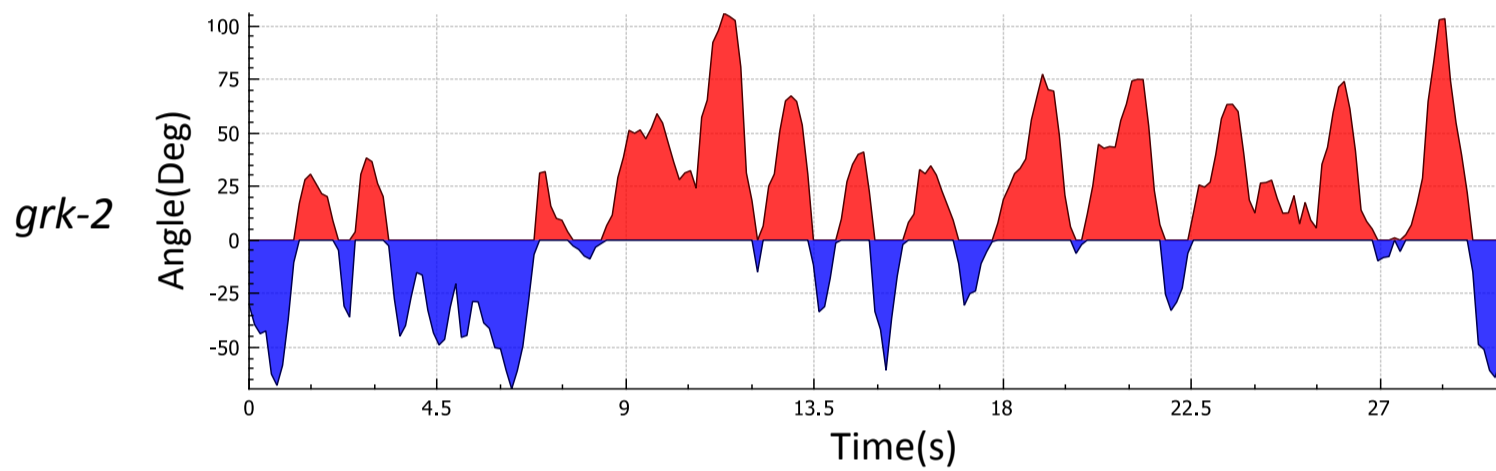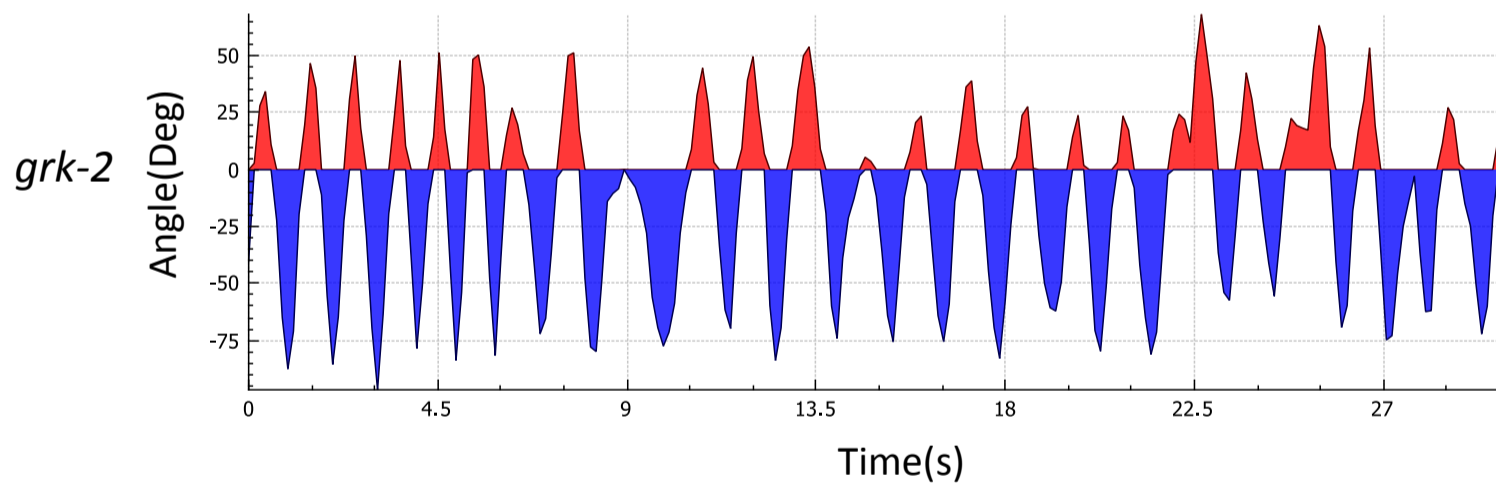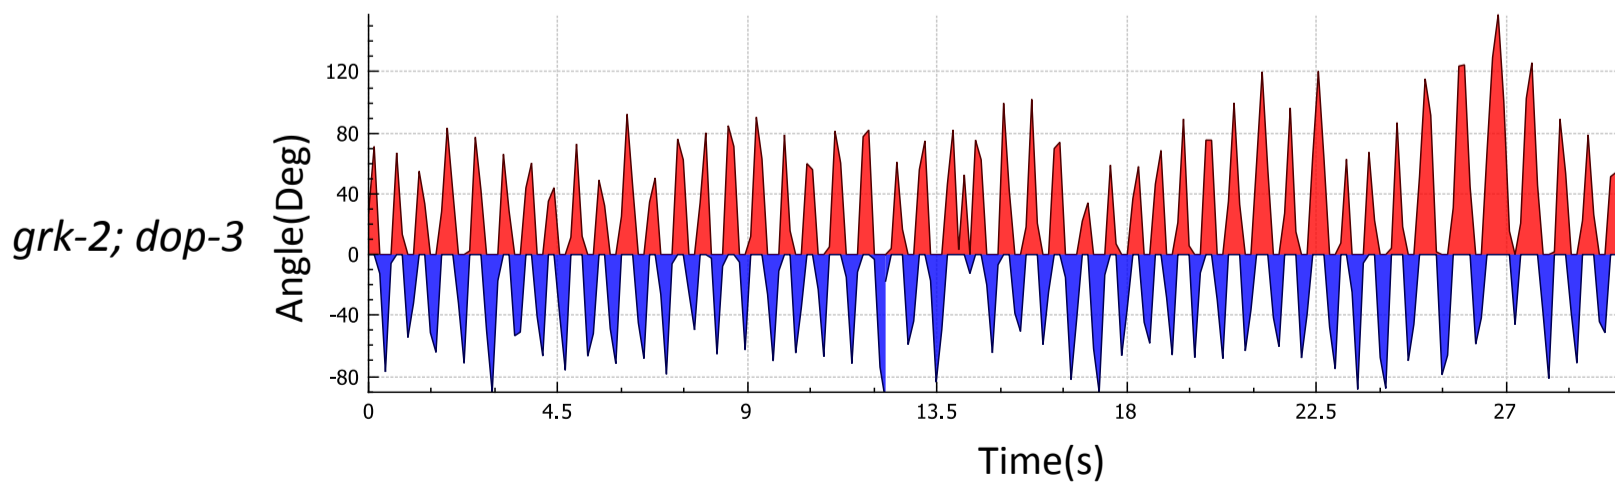



### S3 Fig.

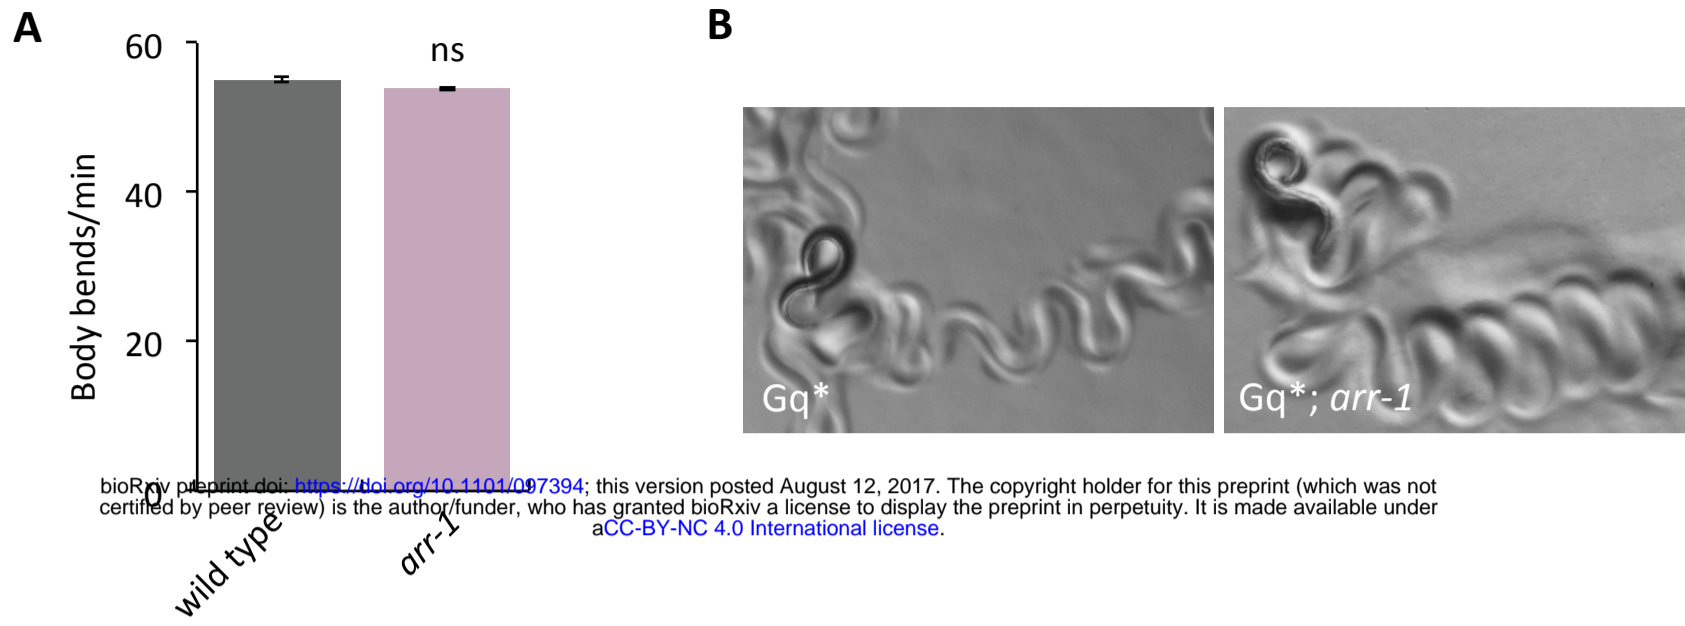

bioRxiv preprint doi: <https://doi.org/10.1101/097394>; this version posted August 12, 2017. The copyright holder for this preprint (which was not certified by peer review) is the author/funder, who has granted bioRxiv a license to display the preprint in perpetuity. It is made available under aCC-BY-NC 4.0 International license.

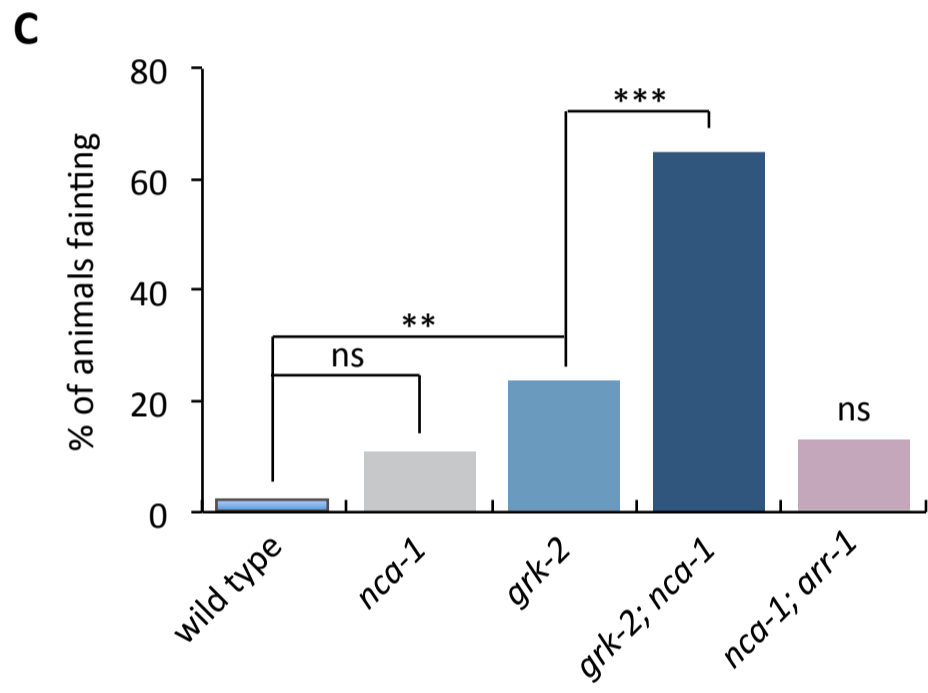

# S4 Fig.

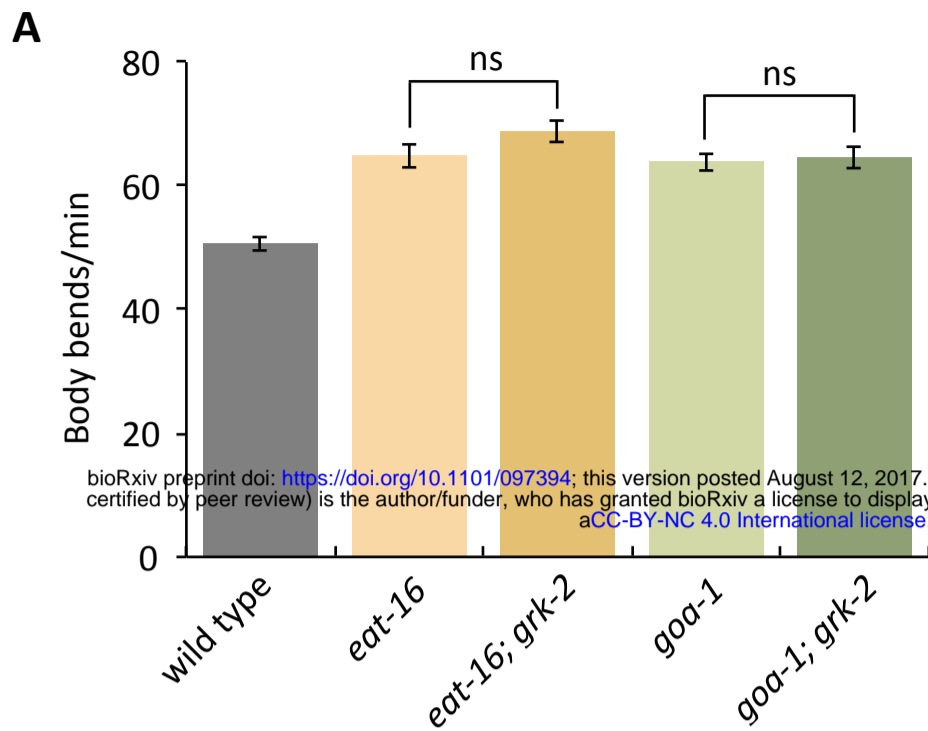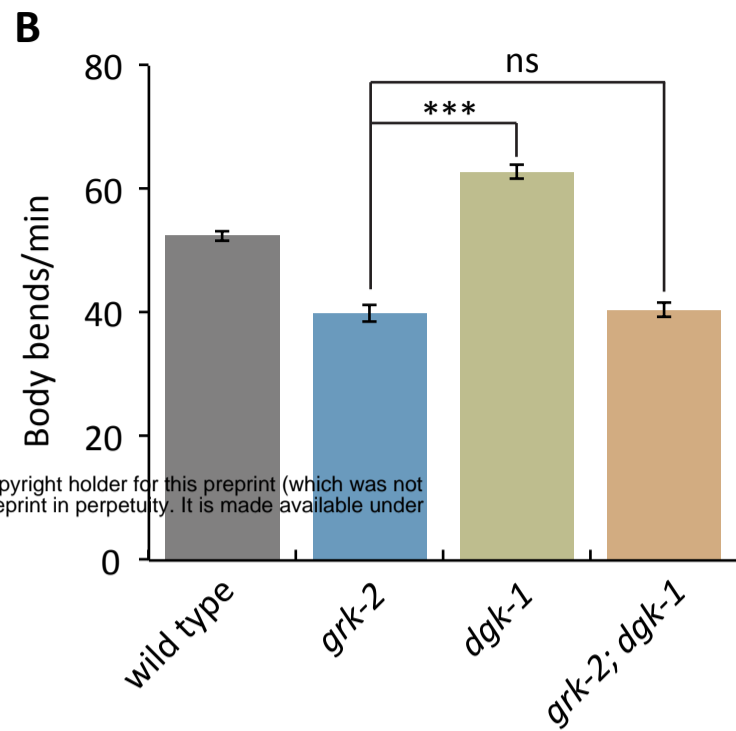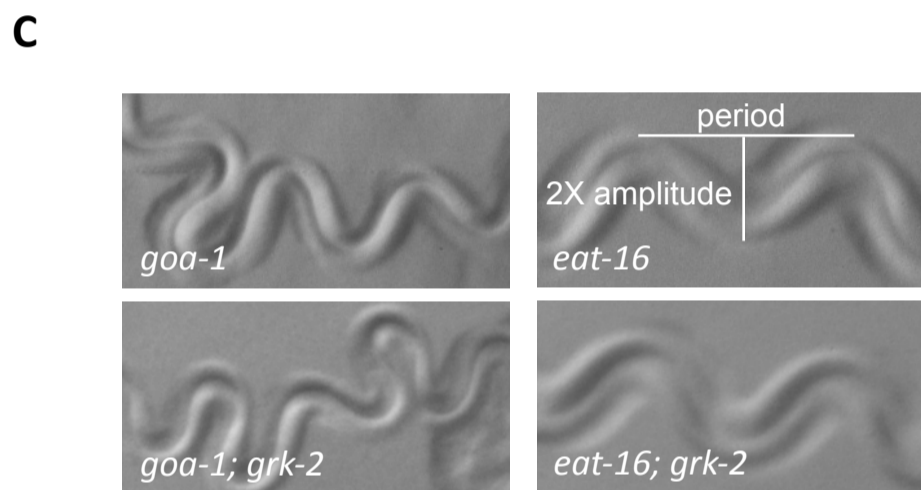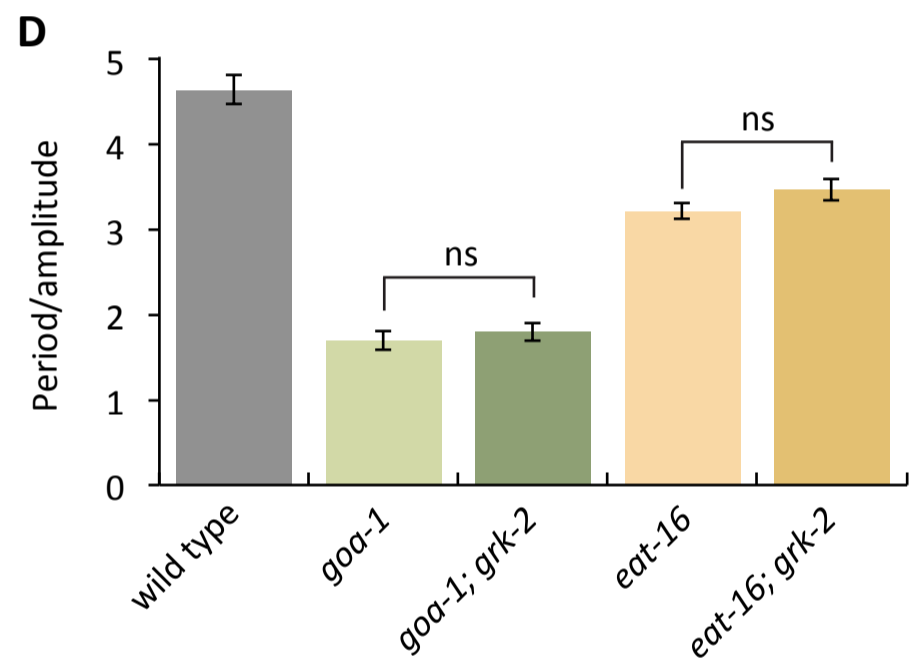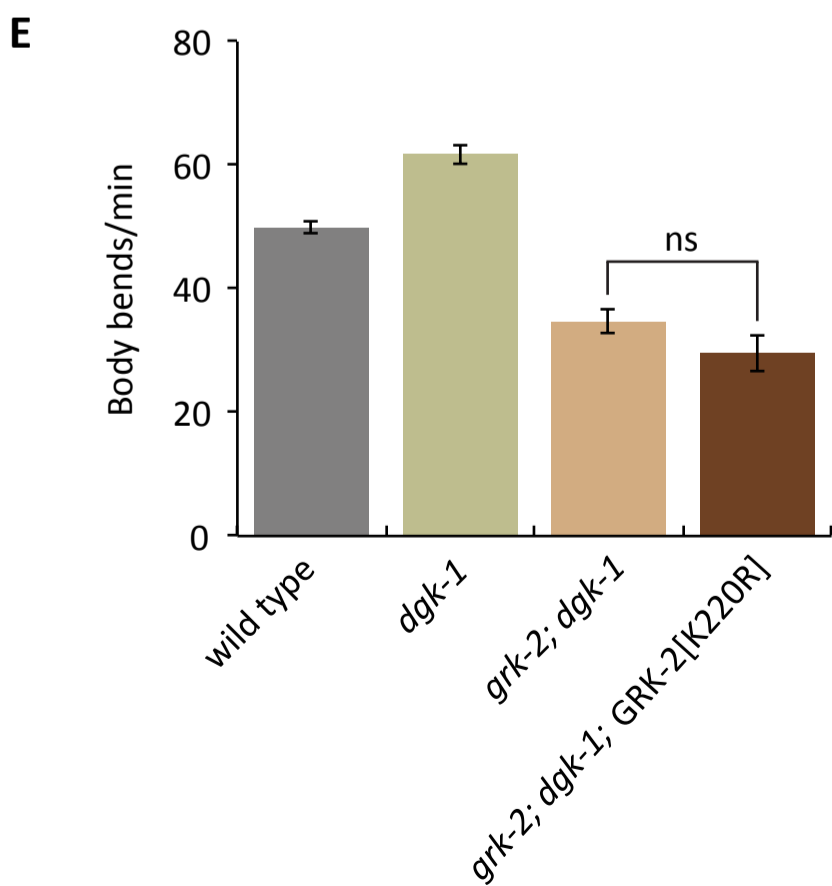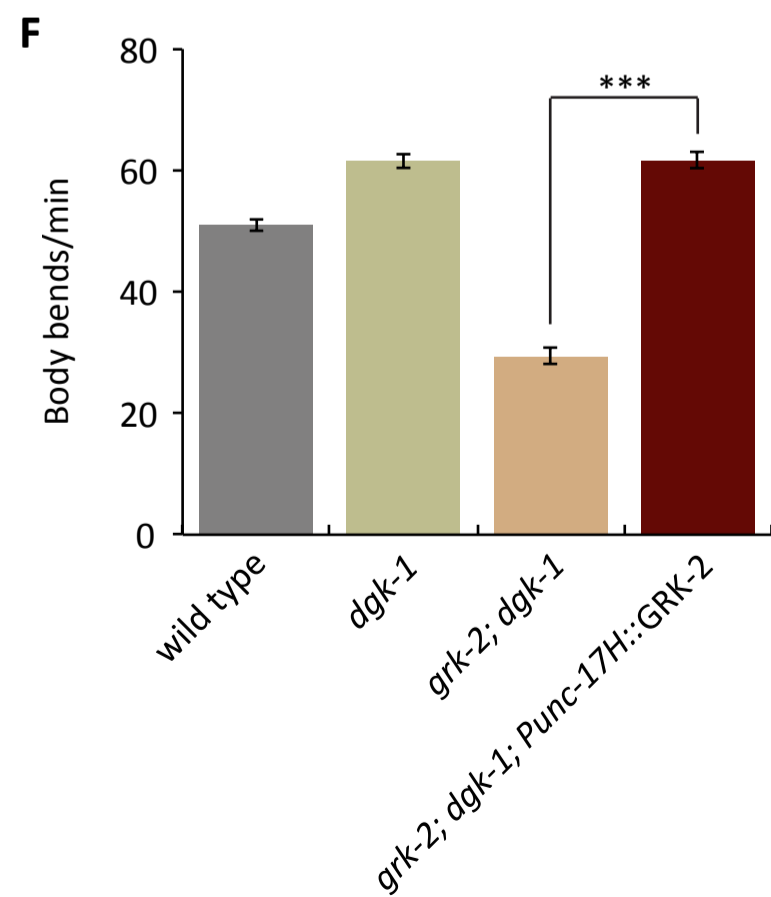

# S5 Fig

**A**

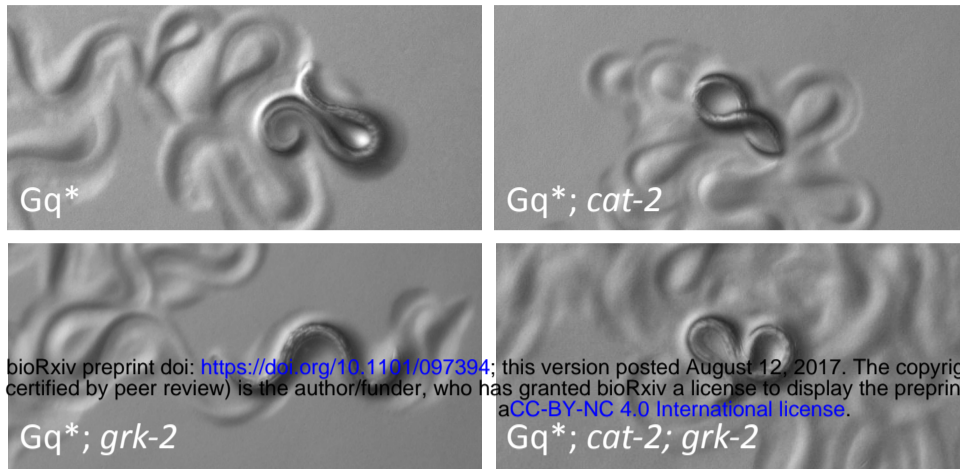

**B**

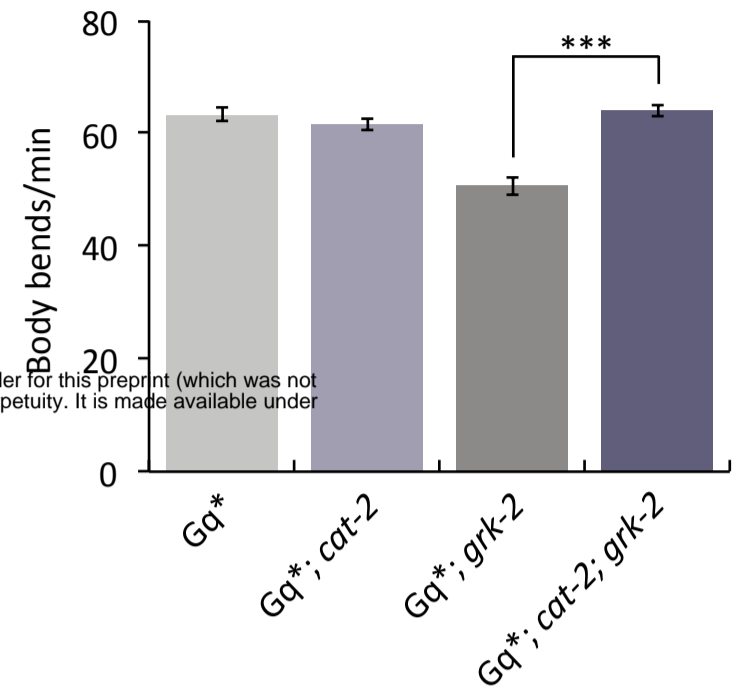



**S6 Fig.**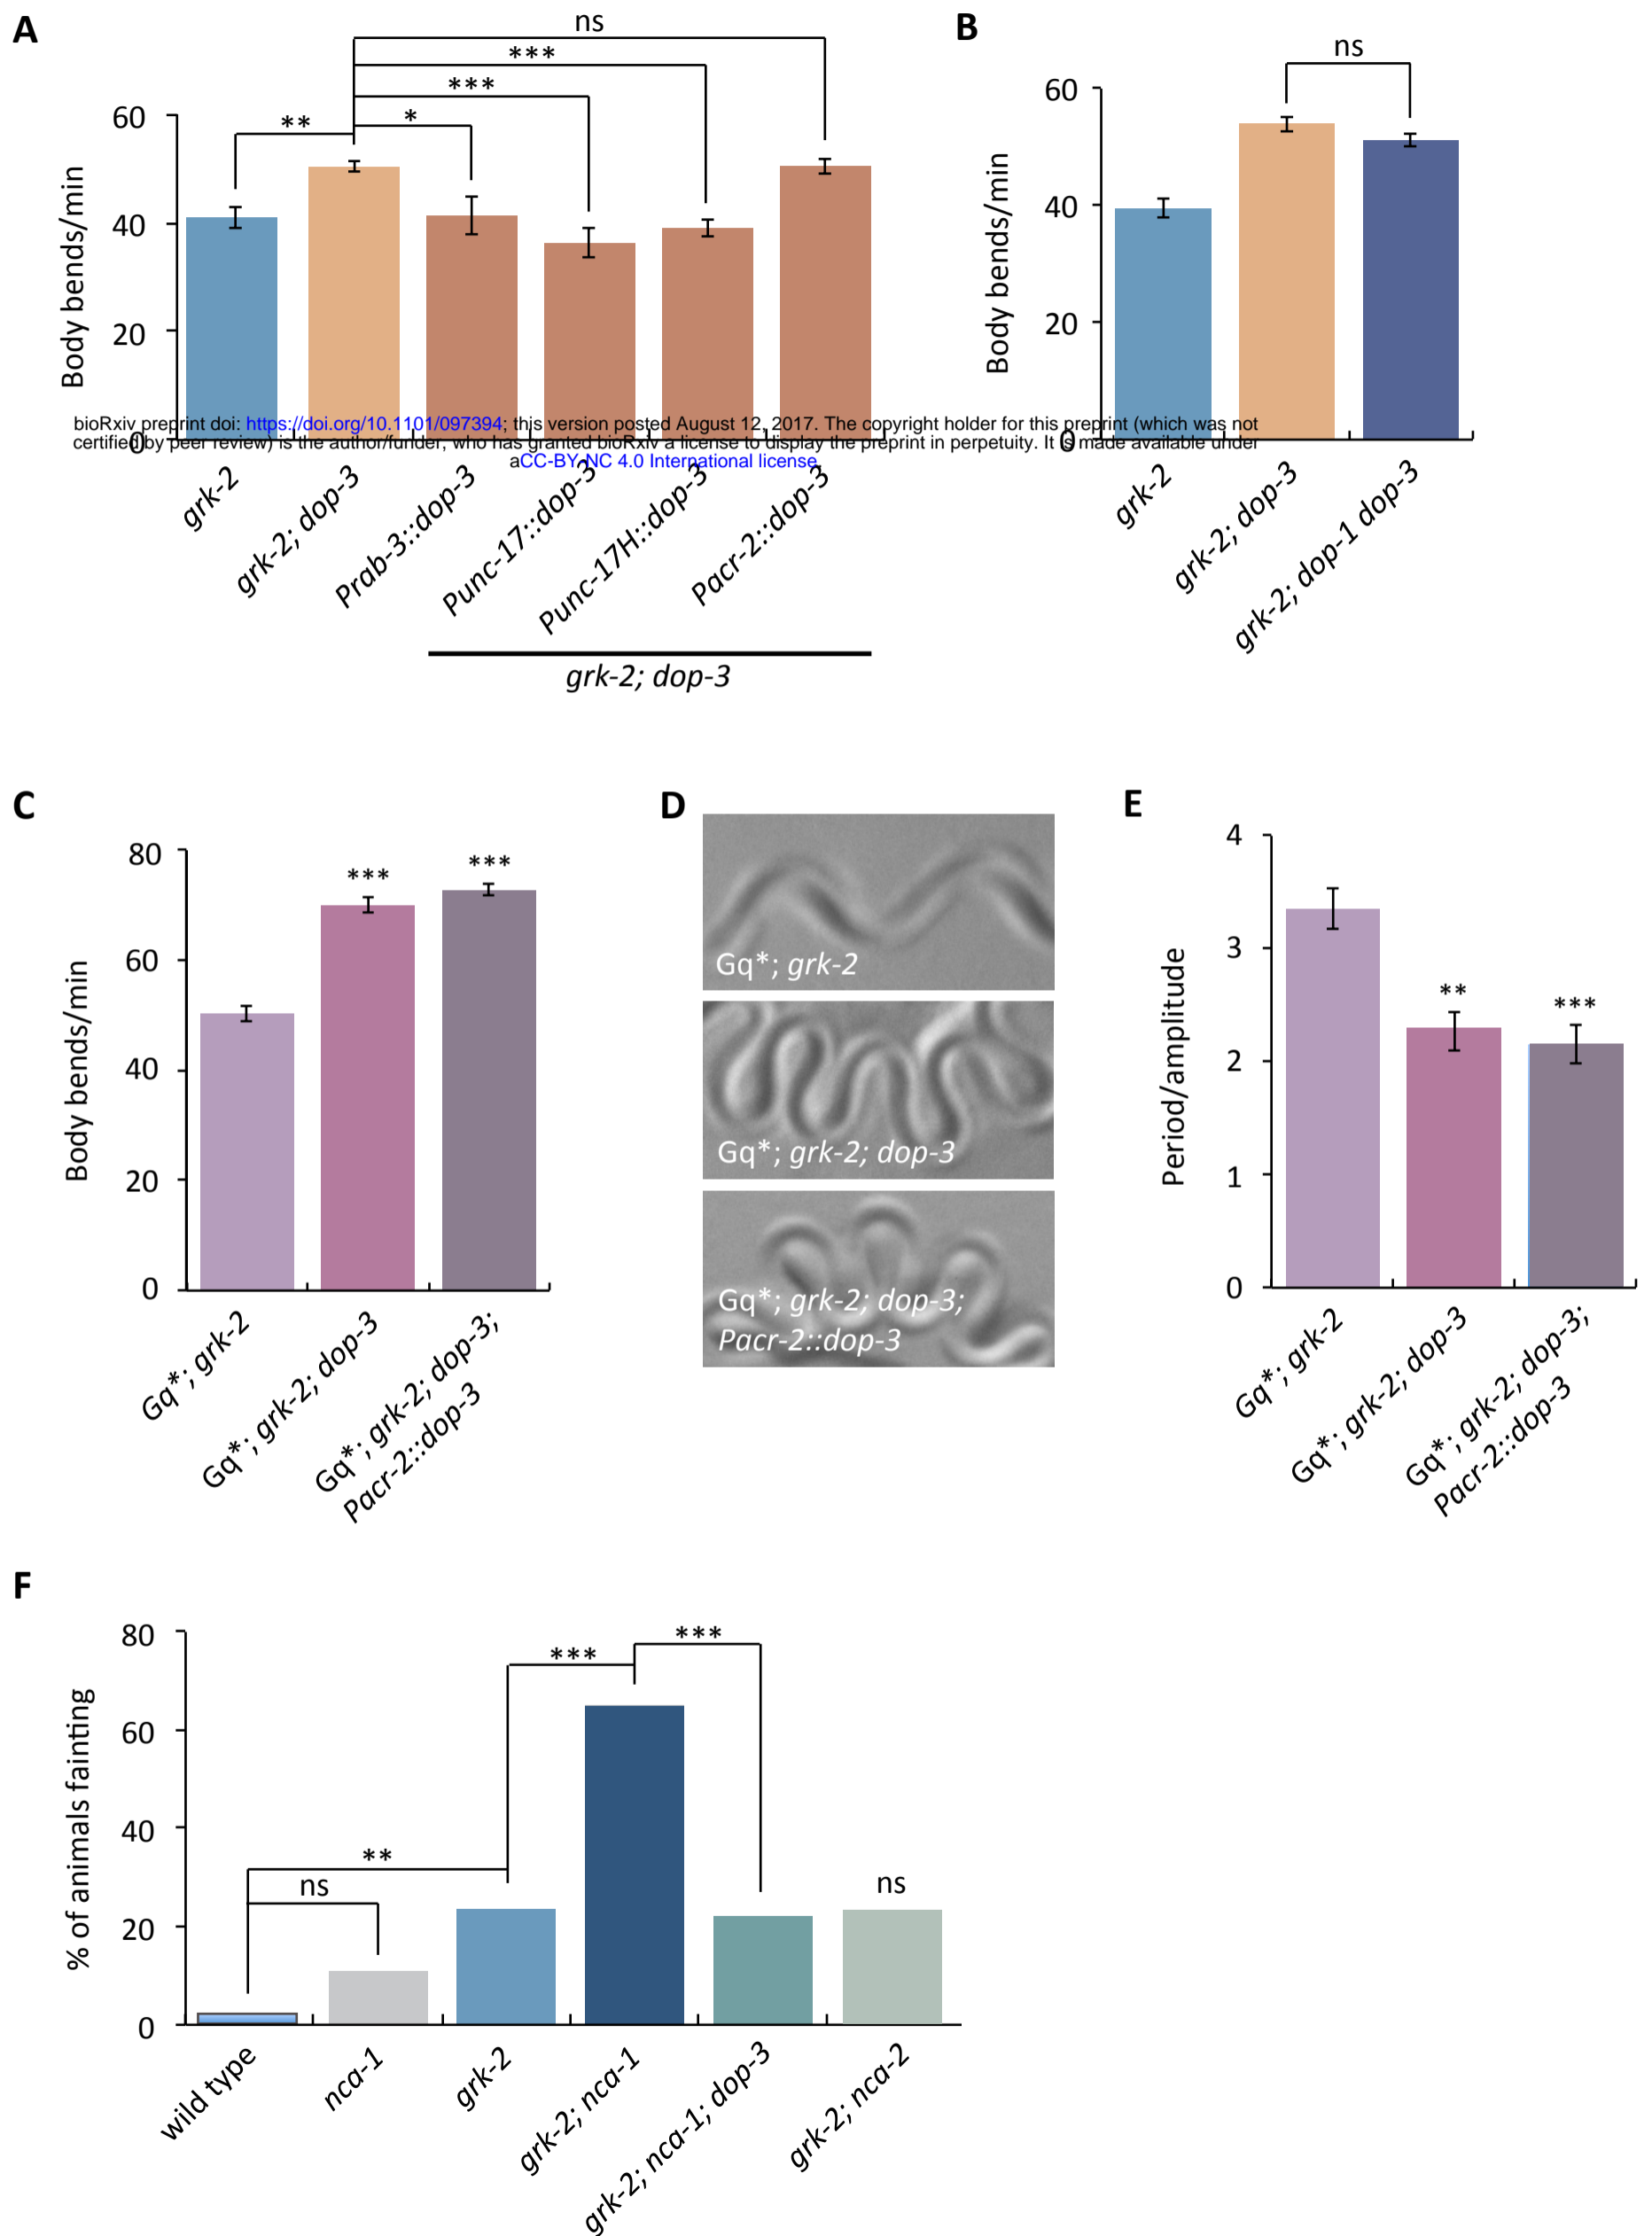

# S7 Fig

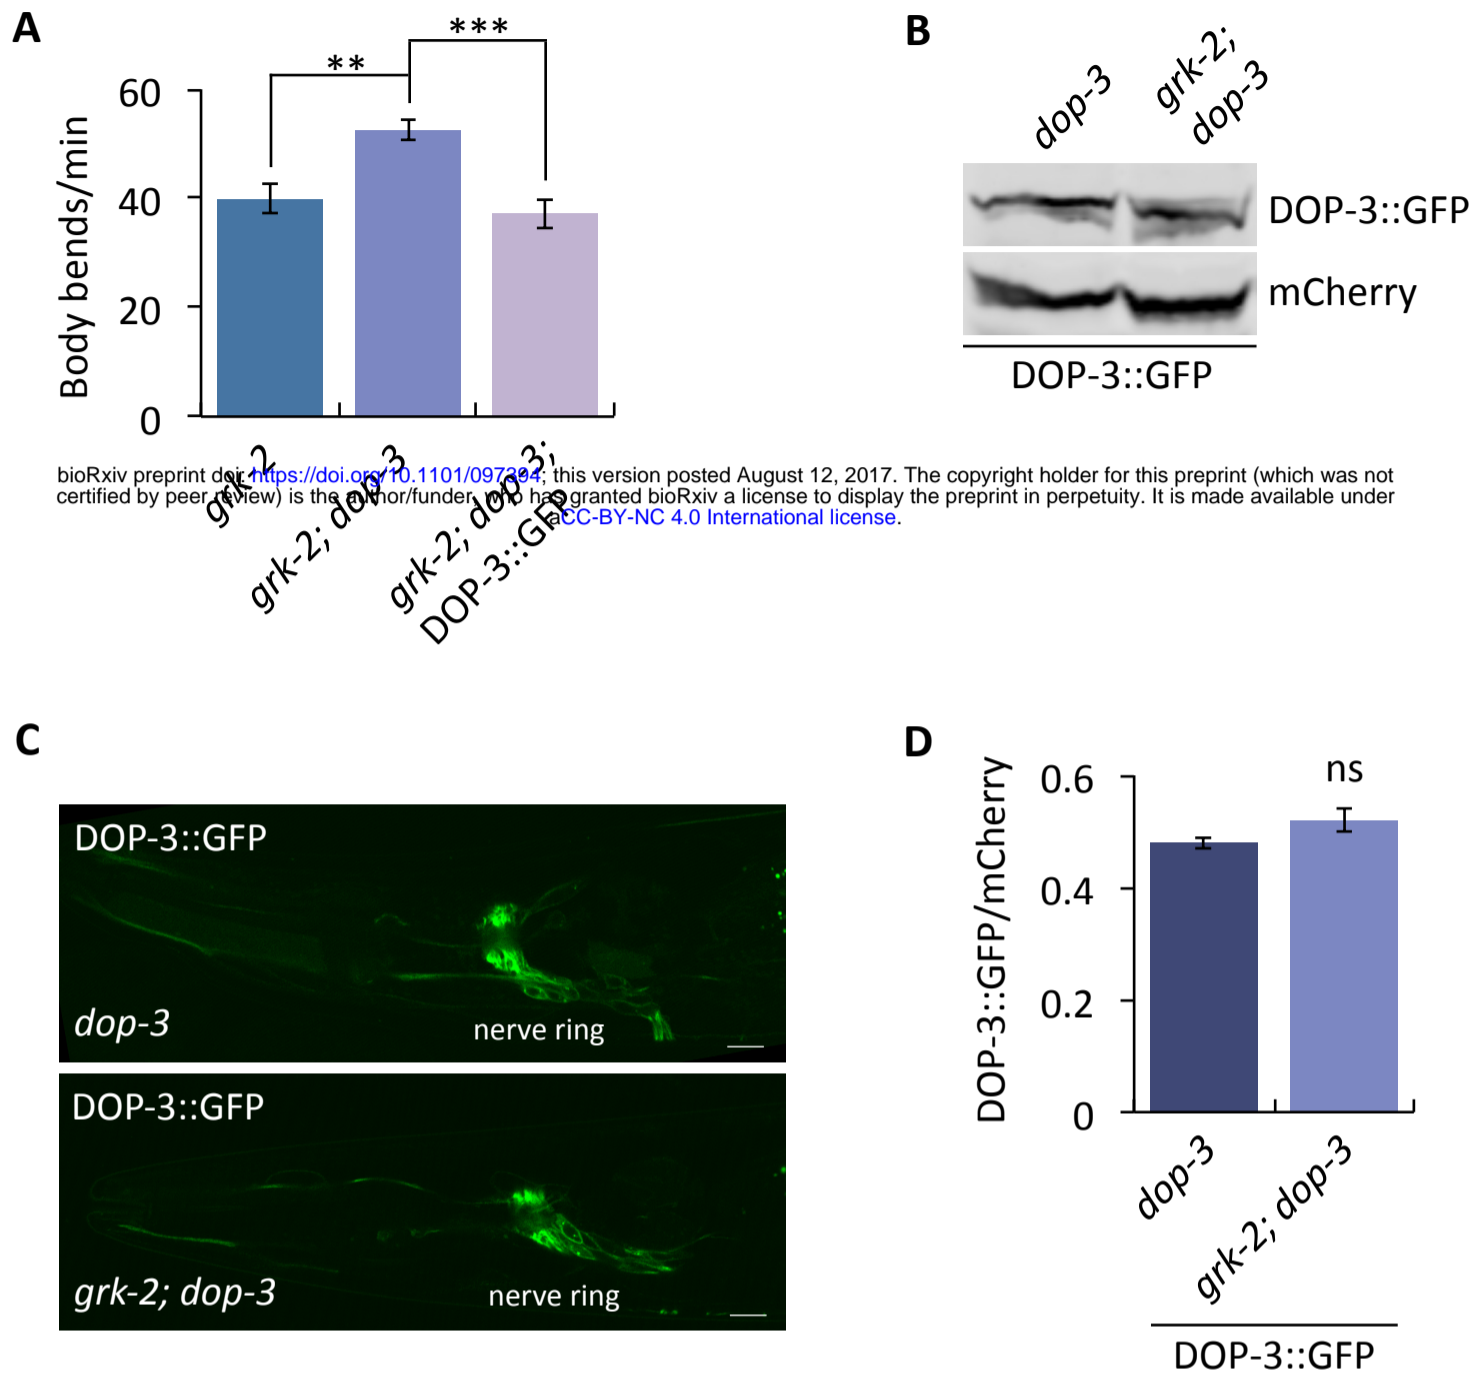

# S8 Fig.

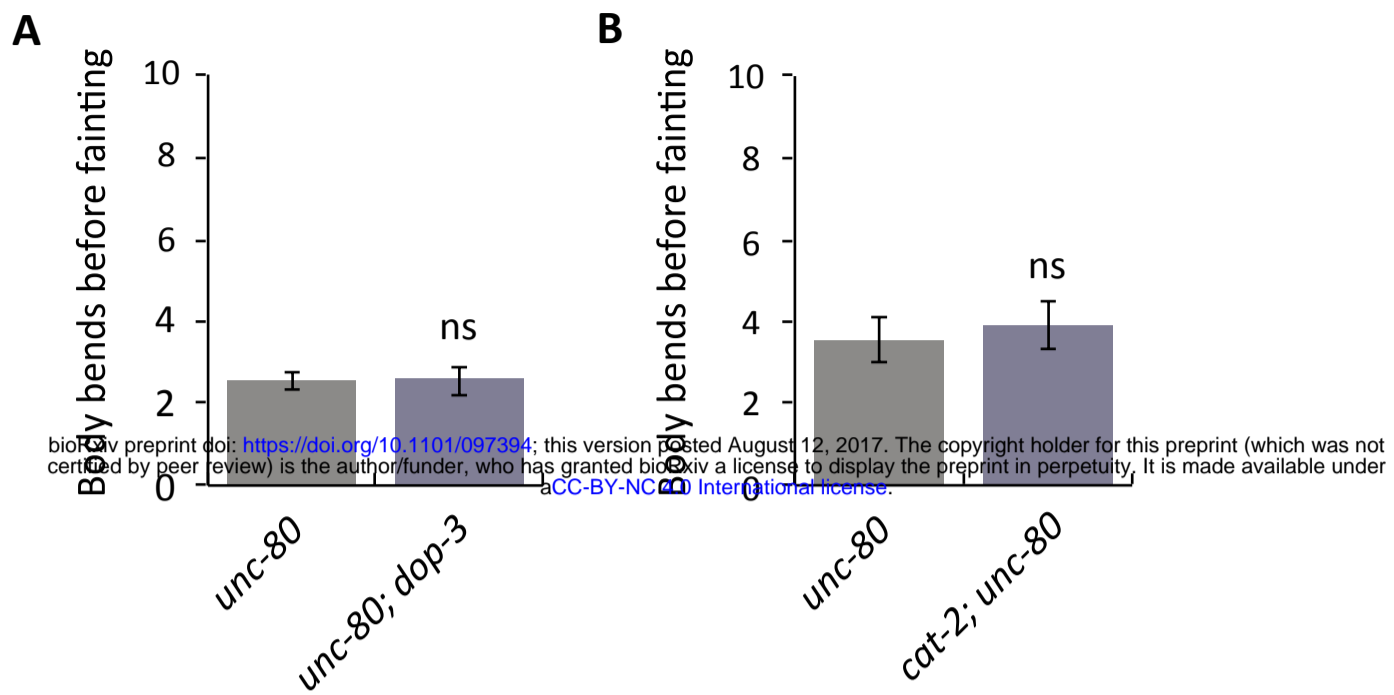

# S9 Fig

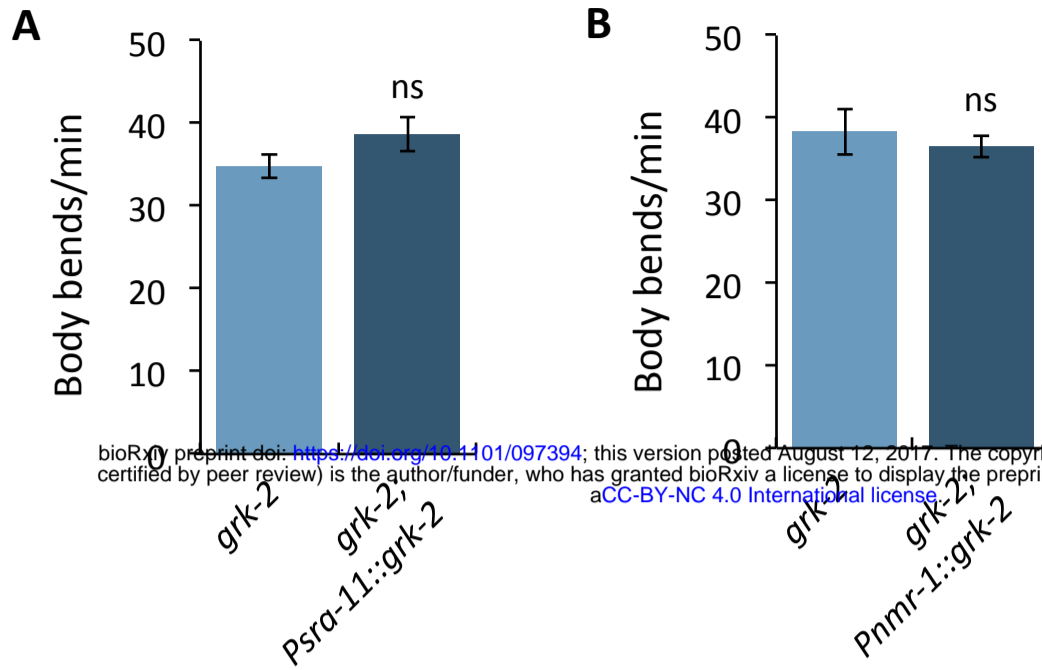

bioRxiv preprint doi: <https://doi.org/10.1101/097394>; this version posted August 12, 2017. The copyright holder for this preprint (which was not certified by peer review) is the author/funder, who has granted bioRxiv a license to display the preprint in perpetuity. It is made available under aCC-BY-NC 4.0 International license.

## S1 Table. List of strains

N2: Bristol wild strain

CB1112: *cat-2(e1112)* II

CB4856: Hawaiian wild strain

EG317: *unc-73(ox317)* I

EG330: *unc-80(ox330)* V

EG352: *nca-1(ox352)* IV

EG4782: *nzls29[Punc-17::rho-1(G14V), unc-122::gfp]* II

EG5504: *nlf-1(tm3631)* X

FG7: *grk-2(gk268)* III

JT47: *egl-8(sa47)* V

EG3745: *eat-16(tm775)* I ; *him-5(e1490)* V

JT734: *goa-1(sa734)* I

LX645: *dop-1(vs100)* X

LX703: *dop-3(vs106)* X

LX705: *dop-1(vs100)* X *dop-3(vs106)* X

MT8504: *egl-10(md176)* V

PS2627: *dgk-1(sy428)* X

RB660: *arr-1(ok401)* X

XZ1151: *egl-30(tg26)* I

The following strains were produced in this study:

XZ18: *grk-2(yak18)* III

XZ1089: *egl-30(tg26)* I ; *grk-2(yak18)* III

XZ1527: *egl-30(tg26)* I ; *grk-2(gk268)* III

- XZ1531: *grk-2(gk268) III ; egl-8(sa47) V*
- XZ1532: *unc-73(ox317) I ; grk-2(gk268) III*
- XZ1544: *grk-2(gk268) III ; yakEx44[Prab-3::*grk-2* cDNA::*tbb-2* 3'UTR::OPERON::GFP::H2B, *Pmyo-3::mCherry*]*
- XZ1549: *grk-2(gk268) III ; yakEx45[Punc-17::*grk-2* cDNA::*tbb-2* 3'UTR::OPERON::GFP::H2B, *Pmyo-2::mCherry*]*
- XZ1551: *grk-2(gk268) III ; yakEx47[Pacr-2::*grk-2* cDNA::*tbb-2* 3'UTR::OPERON::GFP::H2B, *Pmyo-2::mCherry*]*
- XZ1552: *grk-2(gk268) III ; yakEx48[GRK-2[K220R], *Pmyo-2::mCherry*]*
- XZ1559: *nzls29[Punc-17::*rho-1*(G14V), *unc-122::gfp*] II ; grk-2(gk268) III*
- XZ1560: *grk-2(gk268) III ; nca-1(ox352) IV*
- XZ1561: *grk-2(gk268) III ; yakEx51[Punc-17H::*grk-2* cDNA::*tbb-2* 3'UTR::OPERON::GFP::H2B, *Pmyo-3::mCherry*]*
- XZ1562: *grk-2(gk268) III ; yakEx52[Pglr-1::*grk-2* cDNA::*tbb-2* 3'UTR::OPERON::GFP::H2B, *Pmyo-2::mCherry*]*
- XZ1563: *grk-2(gk268) III ; yakEx53[Posm-6::*grk-2* cDNA::*tbb-2* 3'UTR::OPERON::GFP::H2B, *Pmyo-3::mCherry*]*
- XZ1571: *grk-2(gk268) III ; yakEx54[Pgrk-2::*grk-2* cDNA::tagRFP, *Pmyo-3::GFP*]*
- XZ1579: *grk-2(gk268) III ; yakEx55[GRK-2[Y109I], *Pmyo-2::mCherry*]*
- XZ1581: *grk-2(gk268) III ; dgk-1(sy428) X*
- XZ1582: *grk-2(gk268) III ; yakEx57[GRK-2[R106A], *Pmyo-2::mCherry*]*
- XZ1583: *grk-2(gk268) III ; yakEx56[GRK-2[D110A], *Pmyo-2::mCherry*]*
- XZ1641: *grk-2(gk268) III ; yakEx71[Pxbx-1::*grk-2* cDNA::*tbb-2* 3'UTR::OPERON::GFP::H2B, *Pmyo-2::mCherry*]*
- XZ1675: *grk-2(gk268) III ; yakEx77[GRK-2[D3K], *Pmyo-2::mCherry*]*
- XZ1676: *grk-2(gk268) III ; yakEx78[GRK-2[L4K], *Pmyo-2::mCherry*]*
- XZ1684: *eat-16(tm775) I ; grk-2(gk268) III*
- XZ1691: *grk-2(gk268) III ; nlf-1(tm3631) X*
- XZ1692: *grk-2(gk268) III ; yakEx79[GRK-2[V7A/L8A], *Pmyo-2::mCherry*]*
- XZ1693: *grk-2(gk268) III ; yakEx80[GRK-2[D10A], *Pmyo-2::mCherry*]*
- XZ1694: *grk-2(gk268) III ; dgk-1(sy428) X ; yakEx51[Punc-17H::*grk-2* cDNA::*tbb-2* 3'UTR::OPERON::GFP::H2B,*

*Pmyo-3::mCherry*]

XZ1695: *grk-2(gk268) III ; dgk-1(sy428) X ; yakEx48[GRK-2[K220R], Pmyo-2::mCherry]*

XZ1713: *goa-1(sa734) I ; grk-2(gk268) III*

XZ1724: *grk-2(gk268) III ; yakEx85[Pnmr-1::grk-2cDNA::tbb-2 3'UTR::OPERON::GFP::H2B, Pmyo-2::mCherry]*

XZ1727: *grk-2(gk268) III ; yakEx87[GRK-2[K567E], Pmyo-2::mCherry]*

XZ1728: *grk-2(gk268) III ; yakEx88[GRK-2[R587Q], Pmyo-2::mCherry]*

XZ1729 *grk-2(gk268) III ; nca-1(gk9) IV*

XZ1730 *grk-2(gk268) III ; nca-2(gk5) III*

XZ1766: *grk-2(gk268) III ; yakEx95[GRK-2[R195A], Pmyo-2::mCherry]*

XZ1767: *grk-2(gk268) III ; yakIs19[Pgrk-2::grk-2 cDNA::tagRFP] ; yakEx94[Punc-17H::eGFP::let-858 3'UTR]*

XZ1845: *yakEx103[Punc-17H::GOA-1[Q205L]::tbb-2 3'UTR::OPERON::GFP::H2B, Pmyo-2::mCherry]*

XZ1859: *egl-10(md176) V ; nlf-1(tm3631) X*

XZ1876: *nlf-1(tm3631) X ; yakEx103[Punc-17H::GOA-1[Q205L]::tbb-2 3'UTR::OPERON::GFP::H2B, Pmyo-2::mCherry]*

XZ1903: *grk-2(gk268) III ; dop-3(vs106) X*

XZ1904: *egl-30(tg26) I ; grk-2(gk268) III ; dop-3(vs106) X*

XZ1905: *cat-2(e1112) II ; grk-2(gk268) III*

XZ1906: *egl-30(tg26) I ; cat-2(e1112) II ; grk-2(gk268) III*

XZ1909: *grk-2(gk268) III ; dop-3(vs106) X ; yakEx109[Pacr-2::dop-3 cDNA::tbb-2 3'UTR::OPERON::GFP::H2B, Pmyo-2::mCherry]*

XZ1910: *grk-2(gk268) III ; dop-3(vs106) X ; yakEx110[Punc-17H::dop-3 cDNA::tbb-2 3'UTR::OPERON::GFP::H2B, Pmyo-2::mCherry]*

XZ1911: *grk-2(gk268) III ; dop-3(vs106) X ; yakEx111[Punc-17::dop-3 cDNA::tbb-2 3'UTR::OPERON::GFP::H2B, Pmyo-2::mCherry]*

XZ1912: *grk-2(gk268) III ; dop-3(vs106) X ; yakEx112[Prab-3::dop-3 cDNA::tbb-2 3'UTR::OPERON::GFP::H2B,*

*Pmyo-2::mCherry*]

XZ1925: *cat-2(e1112) II ; unc-80(ox330) V*

XZ1935: *cat-2(e1112) II ; nlf-1(tm3631) X*

XZ1936: *unc-80(ox330) V ; dop-3(vs106) X*

XZ1940: *nlf-1(tm3631) X dop-3(vs106) X*

XZ1941: *grk-2(gk268) III ; nlf-1(tm3631) X dop-3(vs106) X*

XZ2007: *grk-2(gk268) III ; dop-1(vs100) X dop-3(vs106) X*

XZ2028: *egl-30(tg26) I ; grk-2(gk268) III ; yakEx48[GRK-2(K220R), Pmyo-2::mCherry]*

XZ2029: *egl-30(tg26) I ; grk-2(gk268) III ; yakEx51[Punc-17H::grk-2 cDNA::tbb-2 3'UTR::OPERON::GFP::H2B,*

*Pmyo-3::mCherry]*

XZ2063: *dop-3(vs106) X ; yakEx130[Pgrk-2::dop-3 cDNA::GFP, Pmyo-2::mCherry]*

XZ2066: *nca-1(gk9) IV ; arr-1(ok401) X*

XZ2071: *grk-2(gk268) III ; yakEx135[Pcho-1(3.3 to 2.6)::grk-2 cDNA::tbb-2 3'UTR::OPERON::GFP::H2B, Pmyo-2::mCherry]*

XZ2075 *grk-2(gk268) III ; yakEx138[Pttx-3::grk-2 cDNA::tbb-2 3'UTR::OPERON::GFP::H2B, Pmyo-2::mCherry]*

XZ2078 *grk-2(gk268) III ; yakEx141[Psra-11::grk-2 cDNA::tbb-2 3'UTR::OPERON::GFP::H2B,*

*Pnmr-1::grk-2 cDNA:: tbb-2 3'UTR::OPERON::GFP::H2B, Pmyo-2::mCherry]*

XZ2086 *grk-2(gk268) III ; yakEx147[Psra-11::grk-2 cDNA::tbb-2 3'UTR::OPERON::GFP::H2B, Pmyo-2::mCherry]*

XZ2087 *grk-2(gk268) III ; dop-3(vs106) X ; yakEx148[Psra-11::dop-3 cDNA::tbb-2 3'UTR::OPERON::GFP::H2B,*

*Pnmr-1::dop-3 cDNA::tbb-2 3'UTR::OPERON::GFP::H2B, Pmyo-2::mCherry]*

XZ2088 *grk-2(gk268) III ; nlf-1(tm3631) X ; yakEx141[Psra-11::grk-2 cDNA::tbb-2 3'UTR::OPERON::GFP::H2B,*

*Pnmr-1::grk-2 cDNA:: tbb-2 3'UTR::OPERON::GFP::H2B, Pmyo-2::mCherry]*

XZ2089: *grk-2(gk268) III ; yakEx149[Pceh-24::grk-2 cDNA::tbb-2 3'UTR::OPERON::GFP::H2B, Pmyo-2::mCherry]*

XZ2090: *grk-2(gk268) III ; dop-3(vs106) X ; yakEx130[Pgrk-2::dop-3 cDNA::GFP, Pmyo-2::mCherry]*



XZ2091: *egl-30(tg26) I ; grk-2(gk268) III ; dop-3(vs106) X ; yakEx109[Pacr-2::dop-3 cDNA::tbb-2*

*3'UTR::OPERON::GFP::H2B, Pmyo-2::mCherry]*

XZ2095: *otIs534[Pcho-1<sup>fosmid</sup>::SL2::YFP::H2B] ; yakIs19[Pgrk-2::grk-2 cDNA::tagRFP]*

## S2 Table. List of plasmids

### Gateway destination vectors

pCFJ150 Gateway destination vector for insertion at chr II Mos site *ttTi5605*

### Gateway entry clones

GL29 *Psra-11* [4-1] (4922 bp of the *sra-11* promoter upstream of the ATG)

pADA180 *Punc-17H* [4-1] (derived from the *unc-17* promoter of pGH1, carrying a 127 bp deletion that removes the nerve cord  $\beta$  enhancer, expressed in head acetylcholine neurons)

p\_C06E1.4\_93 *Pglr-1* [4-1] (from Open Biosystems) (727 bp of the *glr-1* promoter upstream of and including the ATG)

pCFJ31 *Pacr-2* [4-1] (3362 bp of the *acr-2* promoter upstream of the ATG)

pCFJ326 *tbb-2* 3'UTR::OPERON::GFP::H2B [2-3]

pCR185 GFP::*unc-54* 3'UTR [2-3]

pEGB05 *Prab-3* [4-1] (1210 bp of the *rab-3* promoter upstream of the ATG)

pET68 *grk-2* cDNA [1-2]

pET85 *Posm-6* [4-1] (2400 bp of the *osm-6* promoter upstream of the ATG)

pET89 *Pgrk-2* [4-1] (2895 bp of the *grk-2* promoter upstream of the ATG)

pET108 *Pxbx-1* [4-1] (373 bp of the *xbx-1* promoter upstream of the ATG)

pET134 *goa-1*[Q205L] cDNA [1-2]

pET139 *dop-3* cDNA with stop codon [1-2]

pET181 *dop-3* cDNA without stop codon [1-2]

|        |                                                                                                                                                                        |
|--------|------------------------------------------------------------------------------------------------------------------------------------------------------------------------|
| pET185 | <i>Pcho-1</i> (3.3-2.6) [4-1] (fragment of the <i>cho-1</i> promoter from 3300 bp to 2600 bp upstream of the ATG)                                                      |
| pET186 | <i>Pceh-24</i> [4-1] (3013 bp of the <i>ceh-24</i> promoter upstream of the ATG)                                                                                       |
| pET196 | <i>Pttx-3</i> [4-1] (414 bp fragment of the <i>ttx-3</i> genomic region starting from the second exon and including the AIY motif that directs expression only in AIY) |
| pGH1   | <i>Punc-17</i> [4-1] (3229 bp of the <i>unc-17</i> promoter upstream of and including the ATG)                                                                         |
| pGH107 | tagRFP:: <i>let-858</i> 3'UTR [2-3]                                                                                                                                    |
| pMA102 | <i>Pnmr-1</i> [4-1] (4709 bp of the <i>nmr-1</i> promoter upstream of the ATG)                                                                                         |

#### Gateway expression constructs

|        |                                                                                     |
|--------|-------------------------------------------------------------------------------------|
| pET79  | <i>Prab-3</i> :: <i>grk-2</i> cDNA:: <i>tbb-2</i> 3'UTR::OPERON::GFP::H2B_pCFJ150   |
| pET81  | <i>Punc-17</i> :: <i>grk-2</i> cDNA:: <i>tbb-2</i> 3'UTR::OPERON::GFP::H2B_pCFJ150  |
| pET82  | <i>Punc-17H</i> :: <i>grk-2</i> cDNA:: <i>tbb-2</i> 3'UTR::OPERON::GFP::H2B_pCFJ150 |
| pET83  | <i>Pacr-2</i> :: <i>grk-2</i> cDNA:: <i>tbb-2</i> 3'UTR::OPERON::GFP::H2B_pCFJ150   |
| pET86  | <i>Posm-6</i> :: <i>grk-2</i> cDNA:: <i>tbb-2</i> 3'UTR::OPERON::GFP::H2B_pCFJ150   |
| pET88  | <i>Pglr-1</i> :: <i>grk-2</i> cDNA:: <i>tbb-2</i> 3'UTR::OPERON::GFP::H2B_pCFJ150   |
| pET90  | <i>Pgrk-2</i> :: <i>grk-2</i> cDNA::GFP_pCFJ150                                     |
| pET91  | <i>Pgrk-2</i> :: <i>grk-2</i> cDNA::tagRFP_pCFJ150                                  |
| pET93  | <i>Punc-17H</i> ::eGFP:: <i>let-858</i> 3'UTR_pCFJ150                               |
| pET109 | <i>Pxbx-1</i> :: <i>grk-2</i> cDNA:: <i>tbb-2</i> 3'UTR::OPERON::GFP::H2B_pCFJ150   |

|        |                                                                           |
|--------|---------------------------------------------------------------------------|
| pET119 | <i>Pnmr-1::grk-2 cDNA::tbb-2 3'UTR::OPERON::GFP::H2B_pCFJ150</i>          |
| pET135 | <i>Punc-17H::GOA-1[Q205L)::tbb-2 3'UTR::OPERON::GFP::H2B_pCFJ150</i>      |
| pET140 | <i>Prab-3::dop-3 cDNA::tbb-2 3'UTR::OPERON::GFP::H2B_pCFJ150</i>          |
| pET141 | <i>Pacr-2::dop-3 cDNA::tbb-2 3'UTR::OPERON::GFP::H2B_pCFJ150</i>          |
| pET142 | <i>Punc-17::dop-3 cDNA::tbb-2 3'UTR::OPERON::GFP::H2B_pCFJ150</i>         |
| pET143 | <i>Punc-17H::dop-3 cDNA::tbb-2 3'UTR::OPERON::GFP::H2B_pCFJ150</i>        |
| pET184 | <i>Pgrk-2::dop-3 cDNA::GFP_pCFJ150</i>                                    |
| pET190 | <i>Pceh-24::grk-2 cDNA::tbb-2 3'UTR::OPERON::GFP::H2B_pCFJ150</i>         |
| pET191 | <i>Pcho-1(3.3-2.6)::grk-2 cDNA::tbb-2 3'UTR::OPERON::GFP::H2B_pCFJ150</i> |
| pET197 | <i>Pttx-3::grk-2 cDNA::tbb-2 3'UTR::OPERON-GFP::H2B_pCFJ150</i>           |
| pET209 | <i>Pnmr-1::dop-3 cDNA::tbb-2 3'UTR::OPERON::GFP::H2B_pCFJ150</i>          |
| pET214 | <i>Psra-11::grk-2 cDNA::tbb-2 3'UTR::OPERON::GFP::H2B_pCFJ150</i>         |
| pET215 | <i>Psra-11::dop-3 cDNA::tbb-2 3'UTR::OPERON::GFP::H2B_pCFJ150</i>         |

Plasmids used for the GRK-2 structure-function analysis: from Wood et al., 2012.

|       |                               |
|-------|-------------------------------|
| pFG45 | <i>Pgrk-2::GRK-2</i>          |
| pFG46 | <i>Pgrk-2::GRK-2[D3K]</i>     |
| pFG47 | <i>Pgrk-2::GRK-2[L4K]</i>     |
| pFG48 | <i>Pgrk-2::GRK-2[V7A/L8A]</i> |
| pFG49 | <i>Pgrk-2::GRK-2[D10A]</i>    |
| pFG84 | <i>Pgrk-2::GRK-2[R195A]</i>   |
| pFG85 | <i>Pgrk-2::GRK-2[R106A]</i>   |

|       |                              |
|-------|------------------------------|
| pFG86 | <i>Pgrk-2::GRK-2</i> [Y109I] |
| pFG87 | <i>Pgrk-2::GRK-2</i> [D110A] |
| pFG88 | <i>Pgrk-2::GRK-2</i> [K220R] |
| pFG89 | <i>Pgrk-2::GRK-2</i> [K567E] |
| pFG90 | <i>Pgrk-2::GRK-2</i> [R587Q] |
